# Supplementary material for: Applanmerotic acids A and B, two meroterpenoid dimers with an unprecedented polycyclic skeleton from Ganoderma applanatum that inhibit formyl peptide receptor 2
Source: Royal Society of Chemistry journal article supplement (doi:10.1039/d1qo00294e), 2021-01-01

**Applanmerotic acids A and B, two meroterpenoid dimers with an unprecedented polycyclic skeleton from *Ganoderma applanatum* that inhibit formyl peptide receptor 2**

**Xingrong Peng,<sup>a,‡</sup> Haiguo Su,<sup>a,b,‡</sup> Huirong Wang,<sup>c</sup> Guilin Hu,<sup>a,b</sup> Kun Hu,<sup>a</sup> Lin Zhou,<sup>a</sup> Minghua Qiu<sup>\*,a</sup>**

*<sup>a</sup>State Key Laboratory of Phytochemistry and Plant Resources in West China, Kunming Institute of Botany, Chinese Academy of Science, Kunming 650201, People's Republic of China*

*<sup>b</sup>University of the Chinese Academy of Science, Beijing 100049, People's Republic of China*

*<sup>c</sup>Department of Biology, Southern University of Science and Technology, Shenzhen, China*

## Contents

- ✚ 1D and 2D NMR spectra of compound 1
- ✚ HRESIMS, CD, UV Spectra, and computational NMR and ECD data of compound 1
- ✚ 1D and 2D NMR spectra of compound 2
- ✚ HRESIMS, CD, UV Spectra and computational NMR and ECD data of compound 2

## 1D and 2D NMR spectra of compound 1

Figure S1.  $^1\text{H}$  NMR (600 MHz,  $\text{CO}(\text{CD}_3)_2$ ) spectrum of applanmerotic acid A (1).

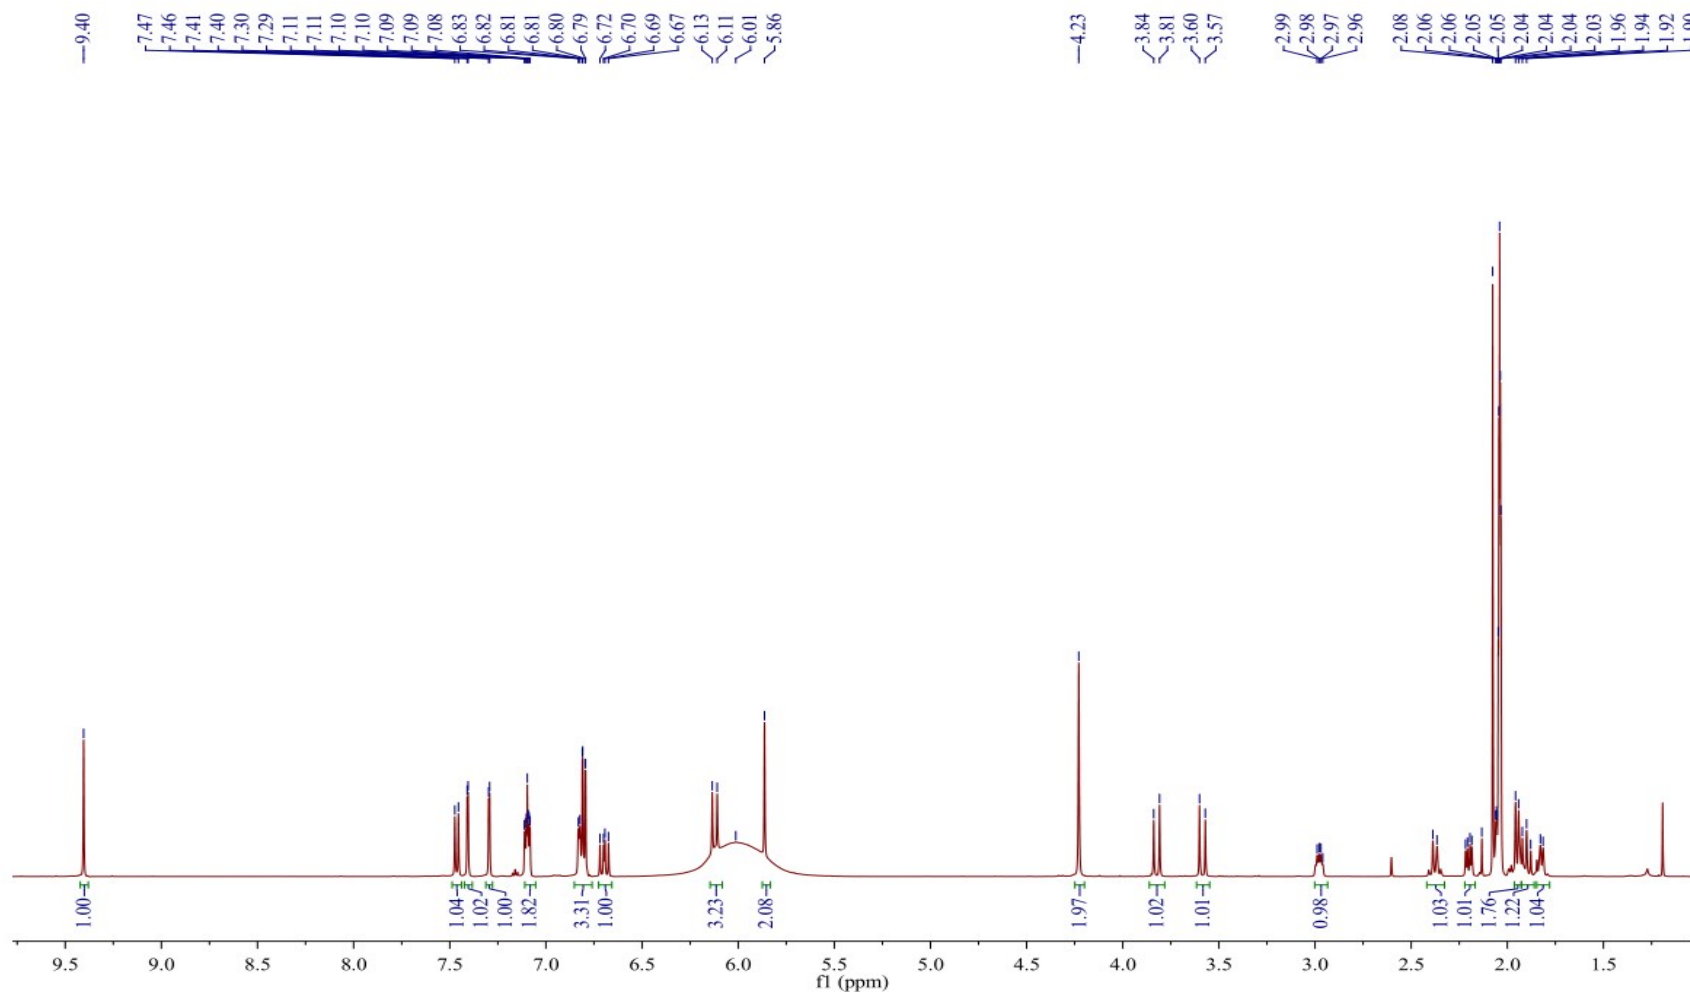

Figure S2.  $^{13}\text{C}$  NMR (150 MHz,  $\text{CO}(\text{CD}_3)_2$ ) spectrum of applanmerotic acid A (1).

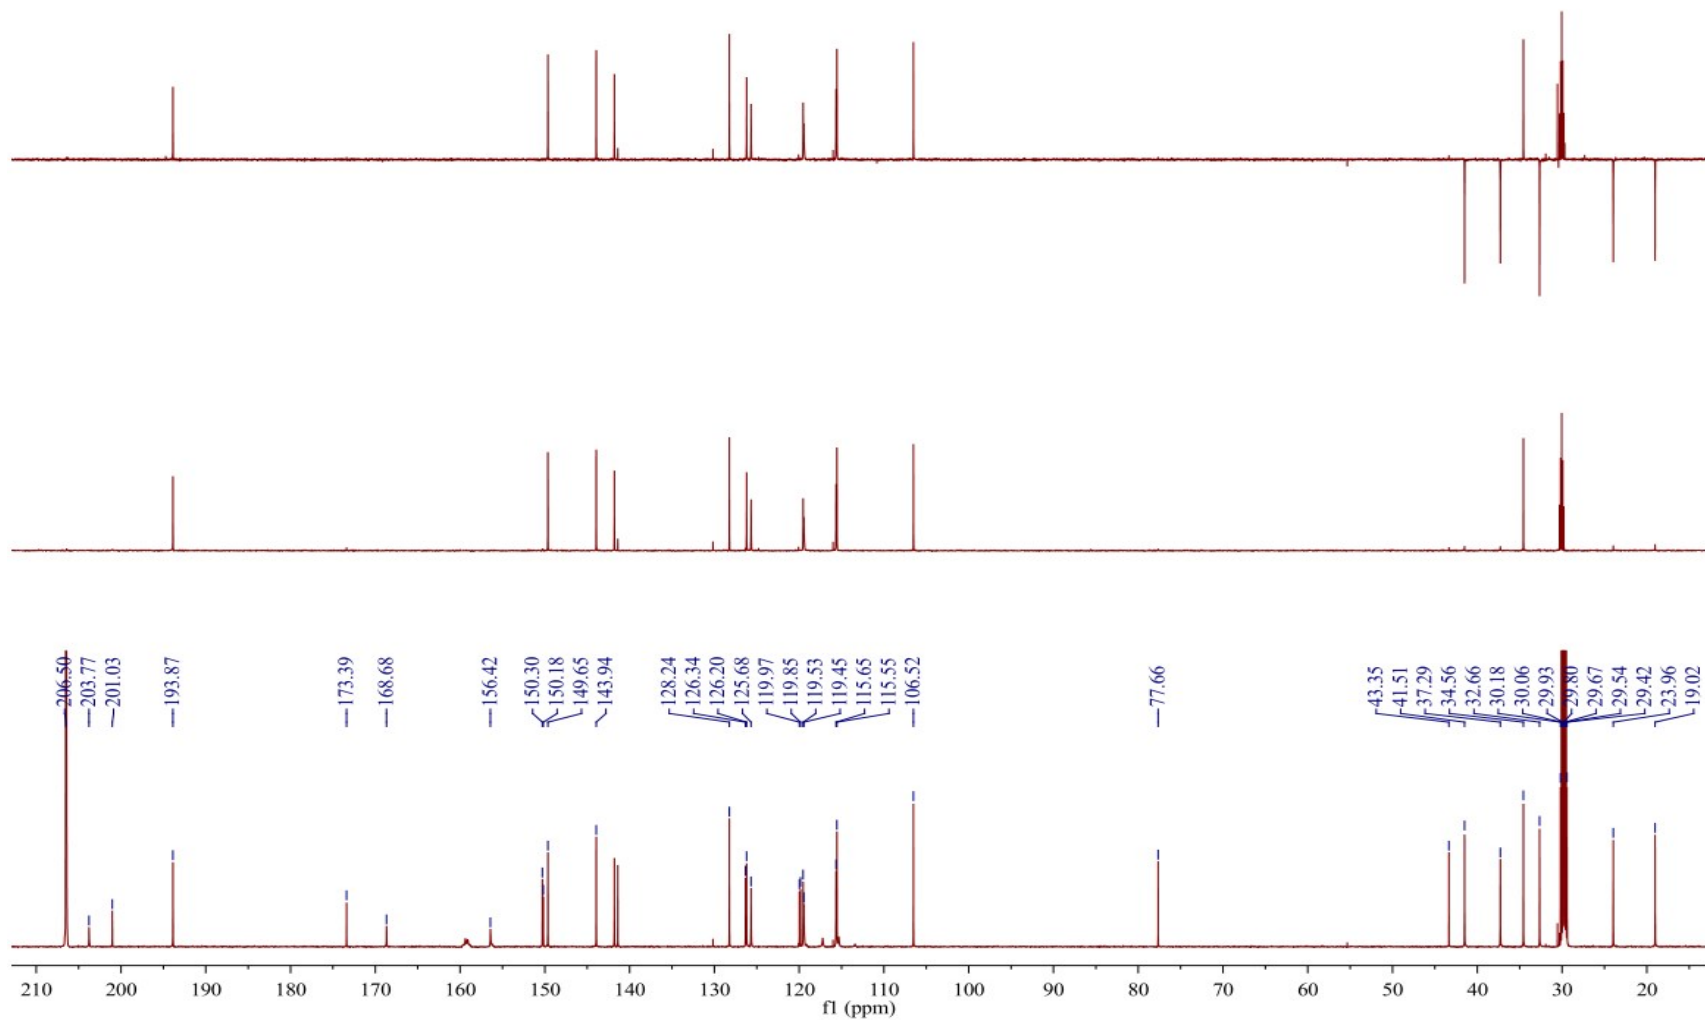

Figure S3.  $^1\text{H}$ - $^1\text{H}$  COSY (600 MHz,  $\text{CO}(\text{CD}_3)_2$ ) spectrum of applanmerotic acid A (1).

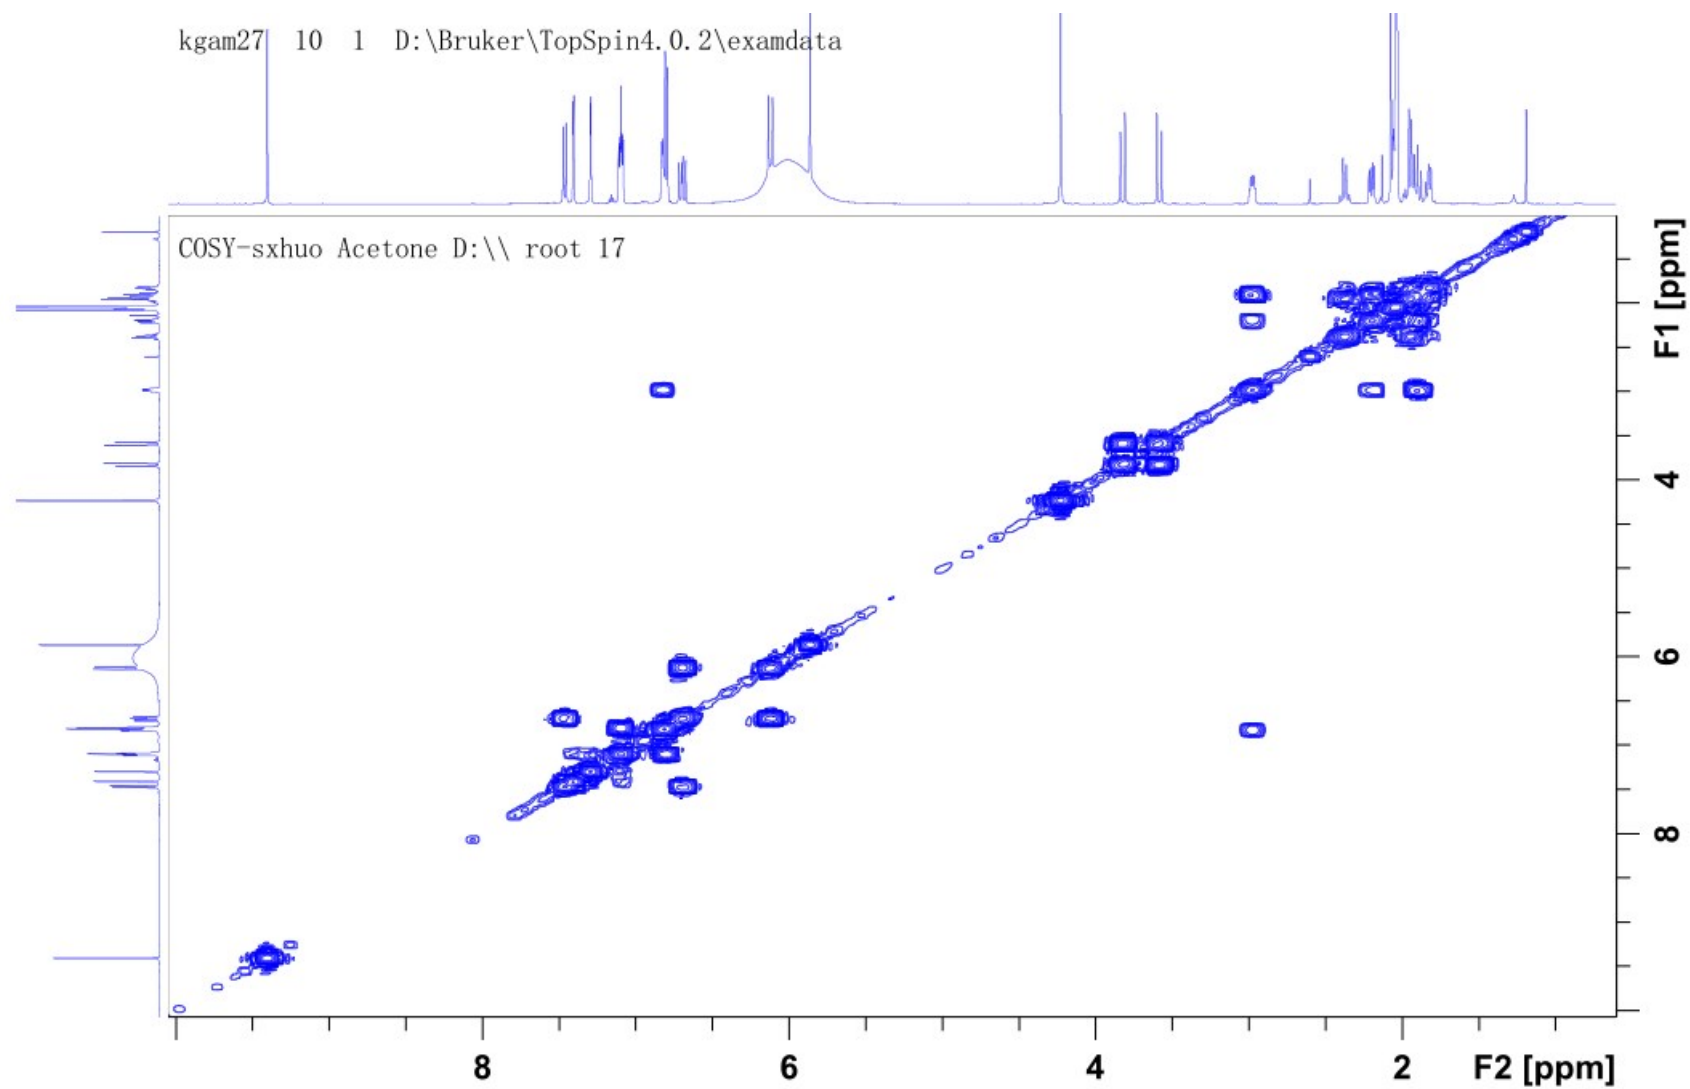

Figure S4. HSQC (600/150 MHz, CO(CD<sub>3</sub>)<sub>2</sub>) spectrum of applanmerotic acid A (1).

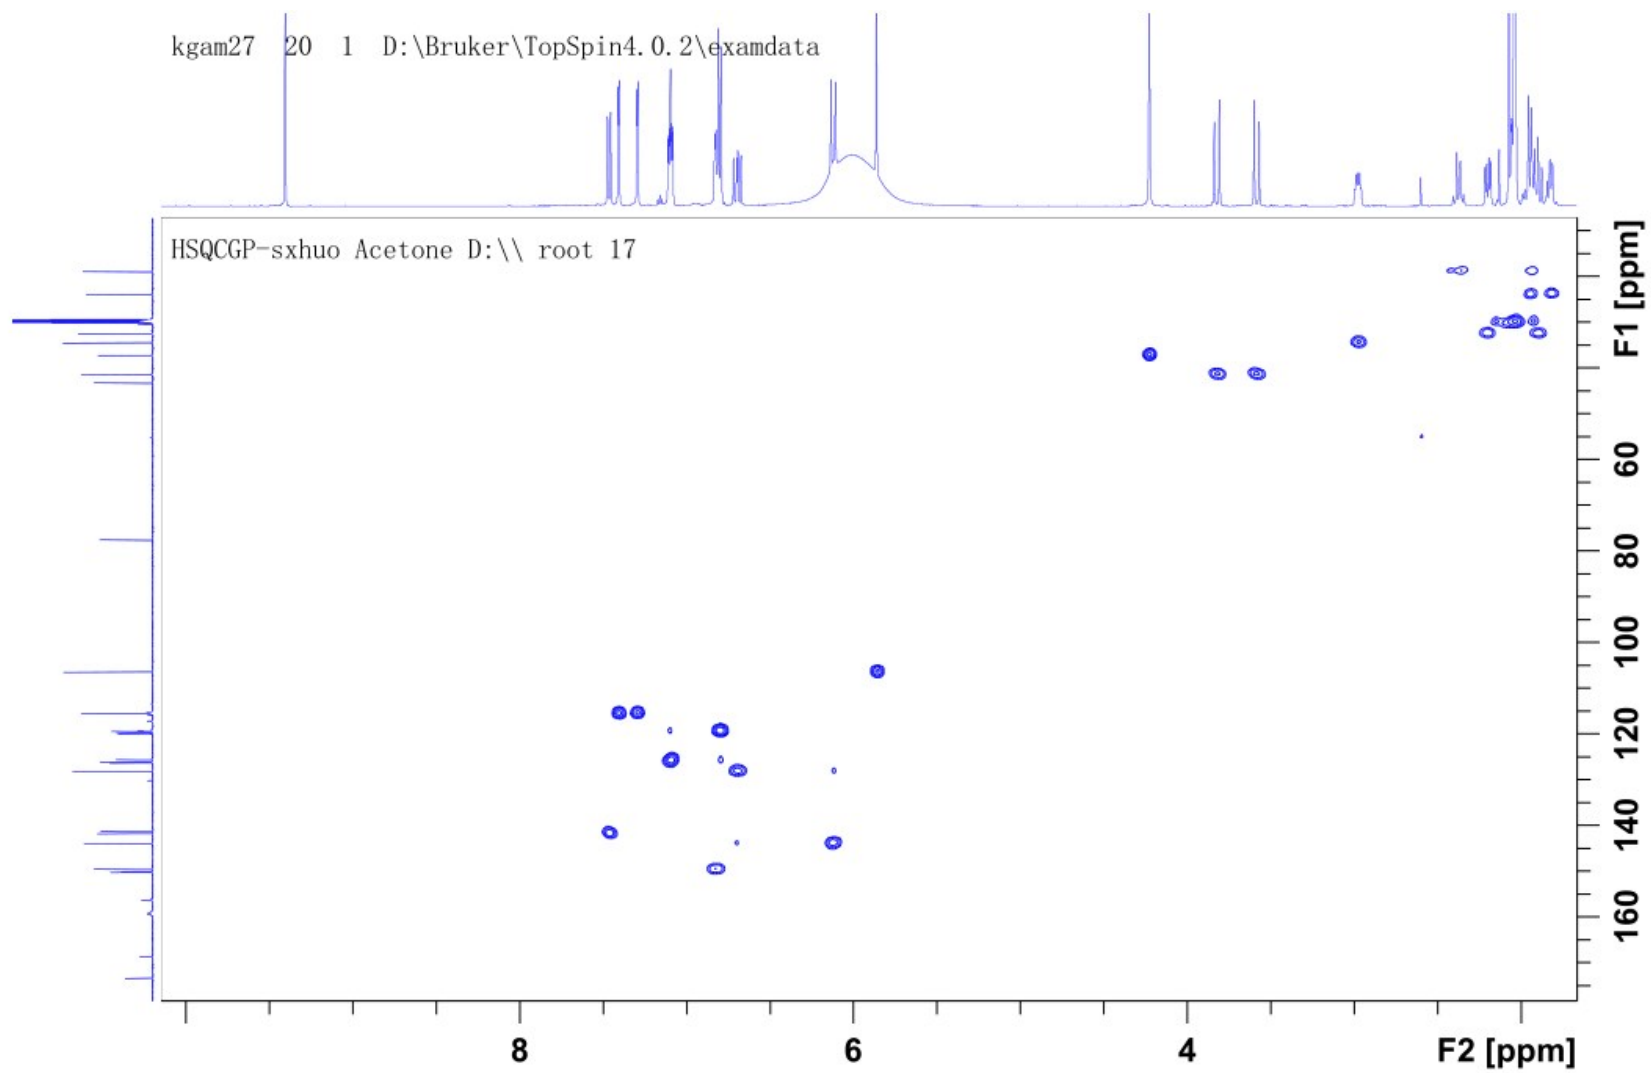

Figure S5. HMBC (600/150 MHz, CO(CD<sub>3</sub>)<sub>2</sub>) spectrum of applanmerotic acid A (1).

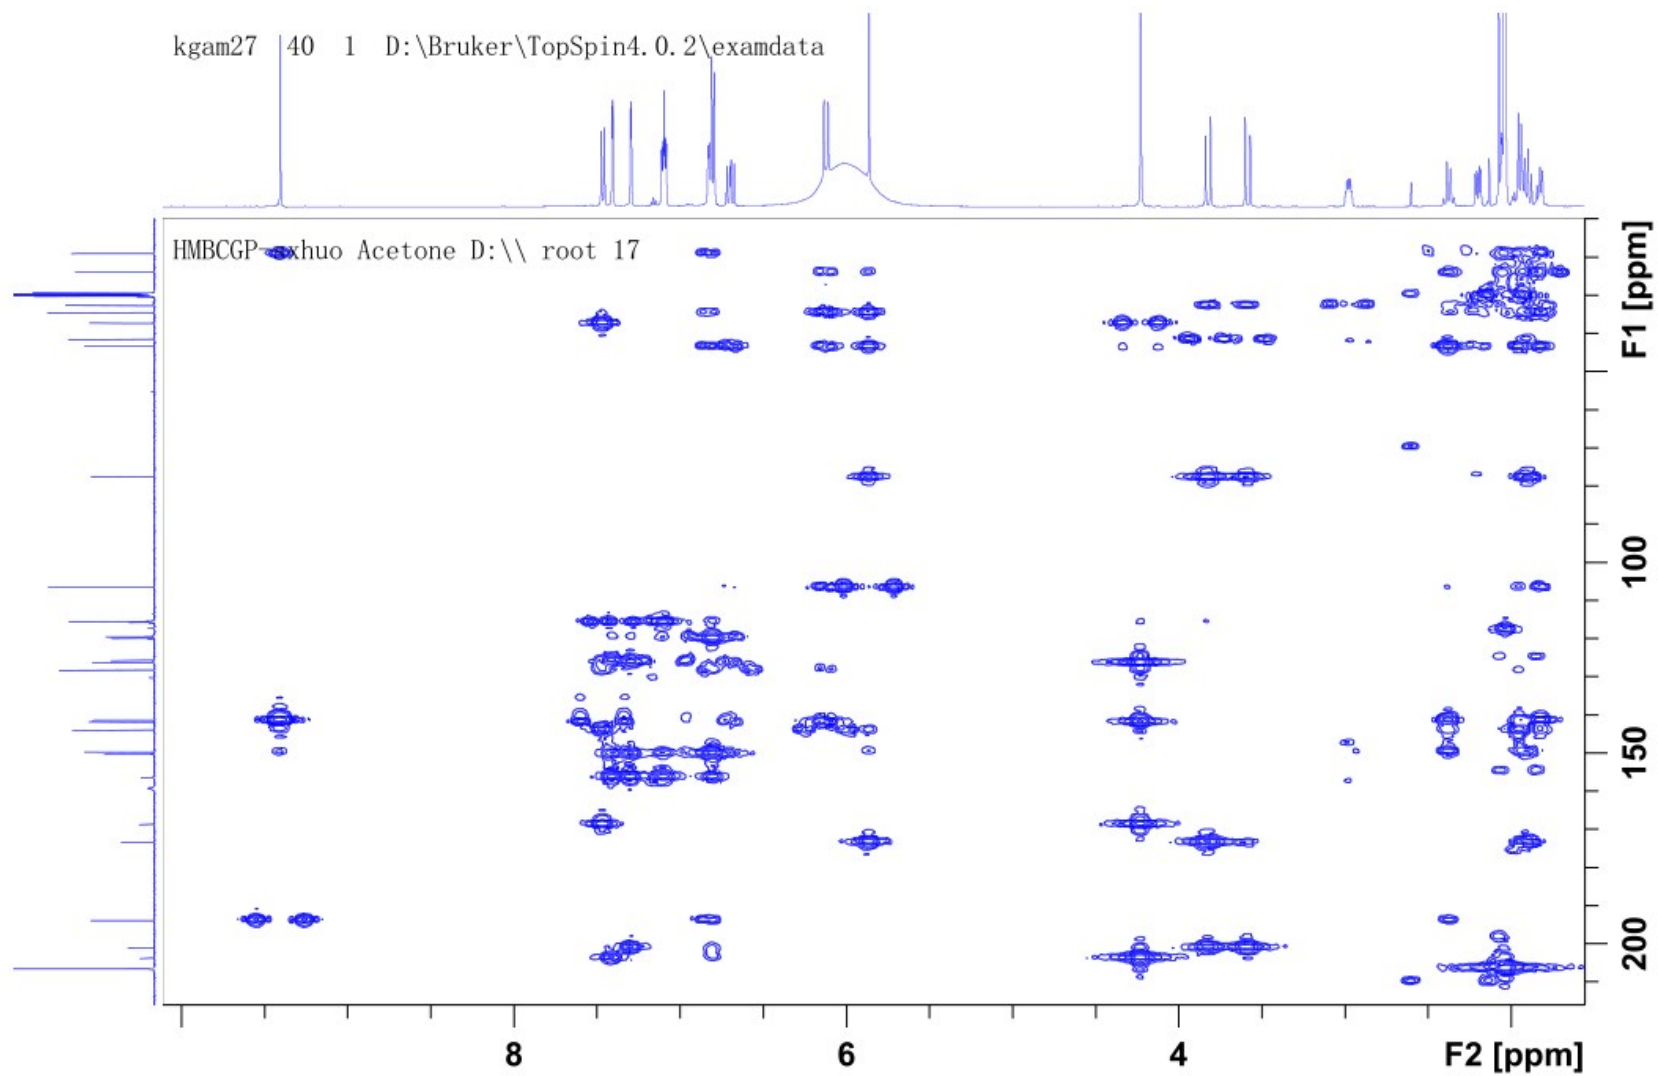

Figure S6. ROESY (600 MHz, CO(CD<sub>3</sub>)<sub>2</sub>) spectrum of applanmerotic acid A (1).

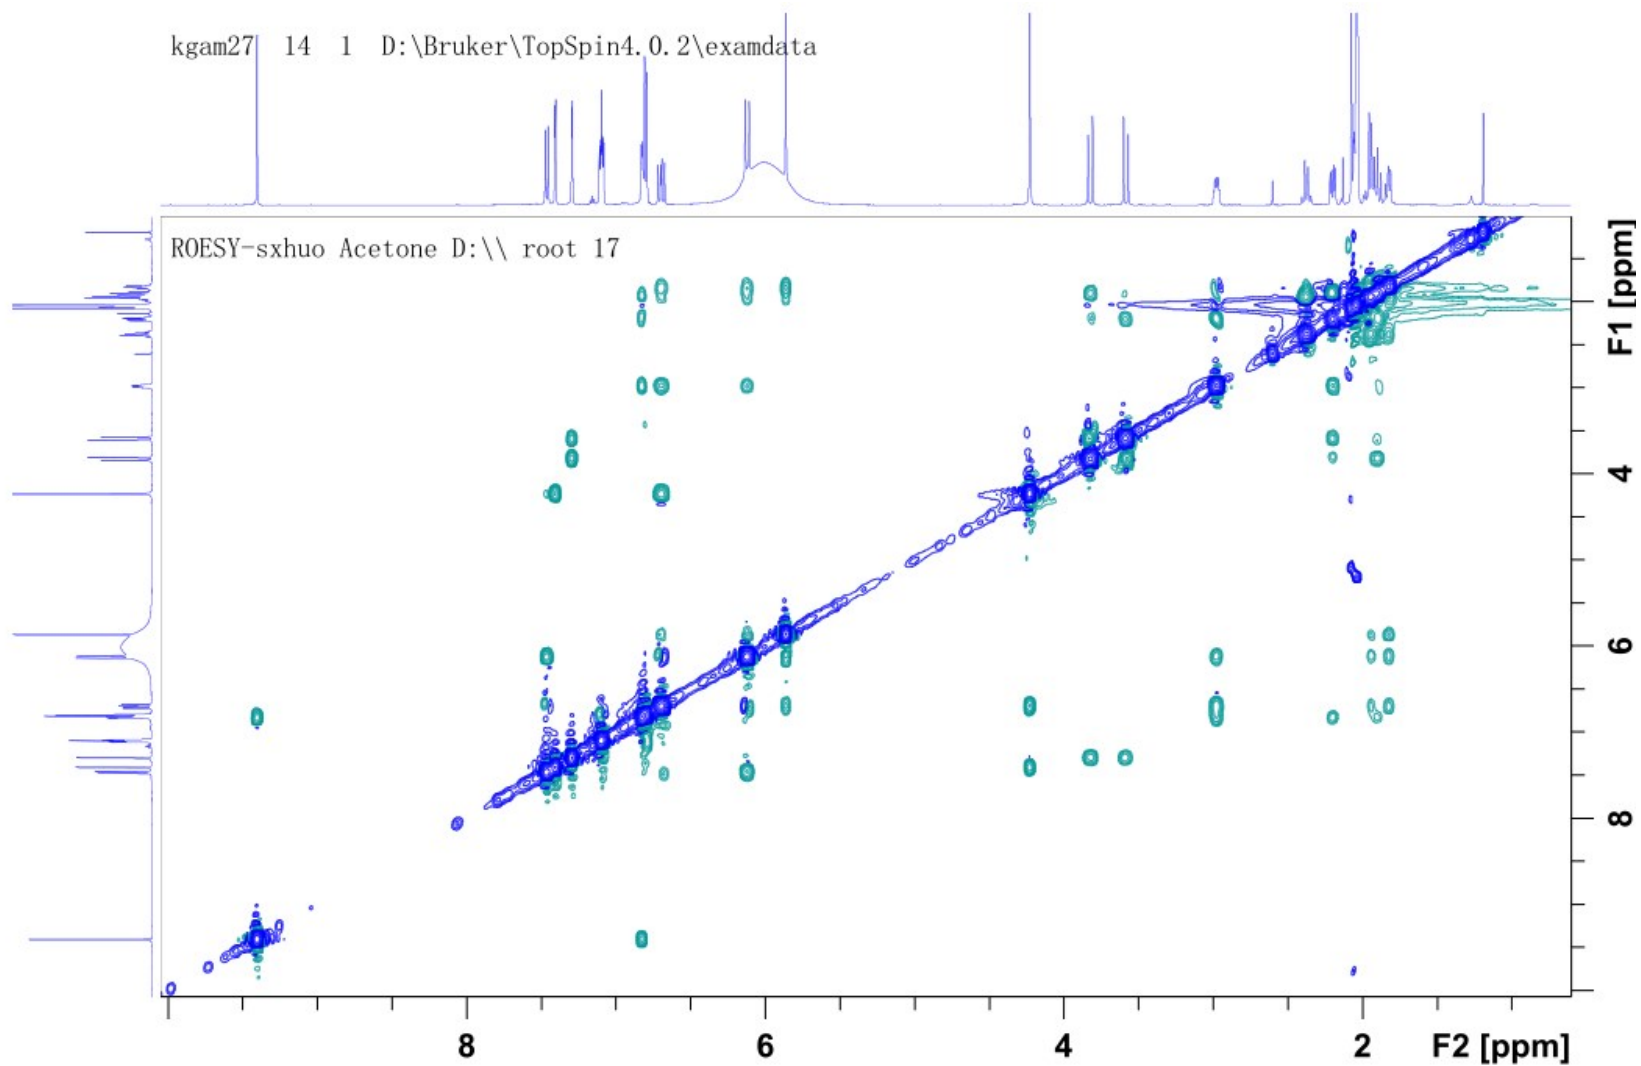



# HRESIMS, CD spectra, as well as computational NMR and ECD data of 1

Figure S7. HRESIMS spectrum of applanmerotic acid A (1).

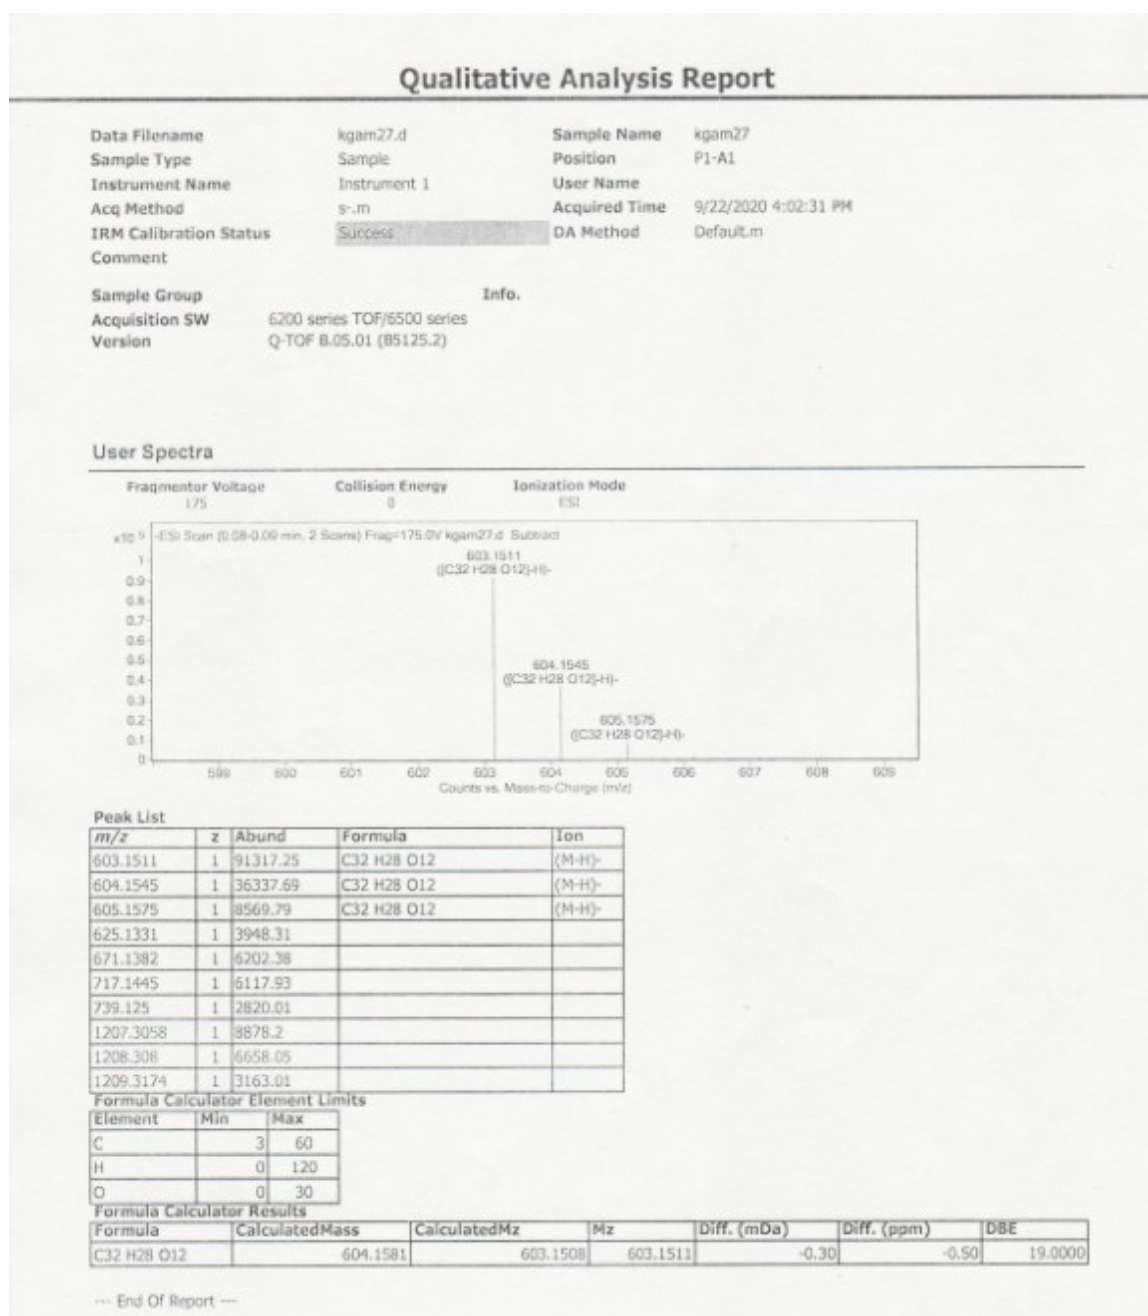

**Figure S8. CD spectrum of applanmerotic acid A (1).**

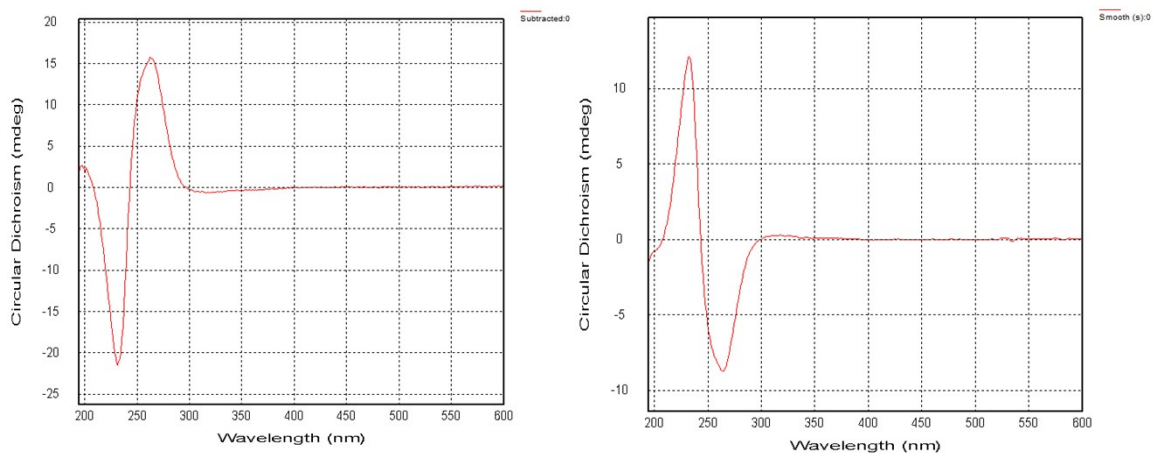

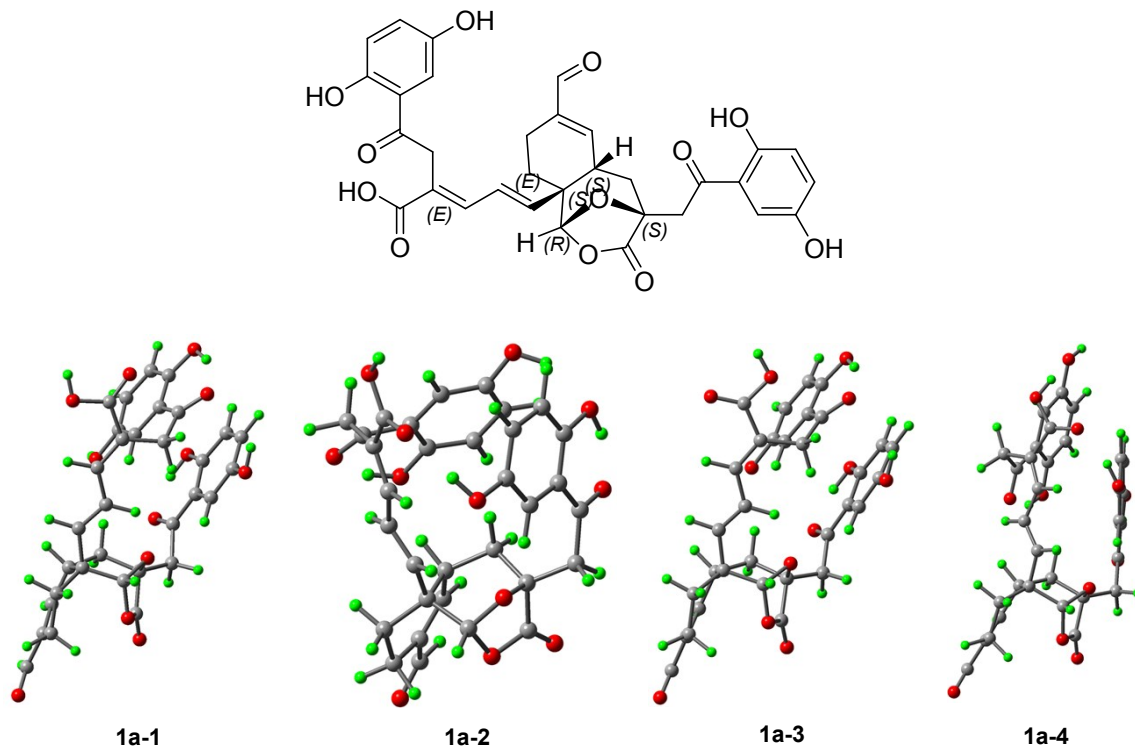

**Figure S9.** Four optimized conformers of **1a**.

**Table S2.** Conformational analysis of the four optimized conformers of **1a** in the gas phase (T = 298.15 K)

| Conformer   | E (Hartree)  | C (Hartree) | G (kcal/mol)    | $\Delta G$ (kcal/mol) | Population |
|-------------|--------------|-------------|-----------------|-----------------------|------------|
| <b>1a-1</b> | -2138.819426 | 0.478133    | -1341809.161188 | 0.0                   | 50.43%     |
| <b>1a-2</b> | -2138.823225 | 0.48257     | -1341808.760818 | 0.40037               | 25.64%     |
| <b>1a-3</b> | -2138.81886  | 0.478321    | -1341808.688185 | 0.473003              | 22.68%     |
| <b>1a-4</b> | -2138.818979 | 0.48118     | -1341806.968697 | 2.192491              | 1.24%      |

Electronic energy obtained at M062X/6-311+G(2d,p) (Solvent=Methanol) level of theory; Thermal correction to Gibbs free energy obtained at B3LYP/6-31G(d), EmpiricalDispersion=GD3 level of theory; Gibbs free energy (E + C); The relative Gibbs free energy; The Boltzmann distribution of each conformer.

**Table S3.** Experimental and calculated  $^{13}\text{C}$ -NMR chemical shifts of **1a**

| No.        | $\delta_{\text{exptl.}}$ | <b>1a</b> - $\delta_{\text{calcd.}}$ |
|------------|--------------------------|--------------------------------------|
| <b>1a</b>  | 156.4                    | 154.1                                |
| <b>2a</b>  | 119.9                    | 116                                  |
| <b>3a</b>  | 115.5                    | 116.7                                |
| <b>4a</b>  | 150.2                    | 143.4                                |
| <b>5a</b>  | 125.7                    | 123.8                                |
| <b>6a</b>  | 119.4                    | 115.9                                |
| <b>7a</b>  | 203.8                    | 205.5                                |
| <b>8a</b>  | 37.3                     | 43.7                                 |
| <b>9a</b>  | 126.3                    | 123.6                                |
| <b>10a</b> | 141.8                    | 144.7                                |
| <b>11a</b> | 128.2                    | 124.2                                |
| <b>12a</b> | 143.9                    | 153.3                                |
| <b>13a</b> | 43.4                     | 44.5                                 |
| <b>14a</b> | 24.0                     | 31.9                                 |
| <b>15a</b> | 106.5                    | 106.6                                |
| <b>16a</b> | 168.7                    | 166                                  |
| <b>1b</b>  | 156.4                    | 153.5                                |
| <b>2b</b>  | 120.0                    | 119                                  |
| <b>3b</b>  | 115.7                    | 116.8                                |
| <b>4b</b>  | 150.3                    | 144.8                                |
| <b>5b</b>  | 125.7                    | 125.6                                |
| <b>6b</b>  | 119.5                    | 118.3                                |
| <b>7b</b>  | 201.0                    | 201.4                                |
| <b>8b</b>  | 41.5                     | 46.6                                 |
| <b>9b</b>  | 77.7                     | 80.1                                 |
| <b>10b</b> | 32.7                     | 32.6                                 |
| <b>11b</b> | 34.6                     | 40.8                                 |
| <b>12b</b> | 149.6                    | 156.6                                |
| <b>13b</b> | 141.4                    | 140.9                                |
| <b>14b</b> | 19.0                     | 22.2                                 |
| <b>15b</b> | 193.9                    | 191.6                                |
| <b>16b</b> | 173.4                    | 172                                  |

**Table S4.** Atomic coordinates (Å) of **1a-1** obtained at the B3LYP/6-31G(d,p) level of theory in the gas phase.

|   |           |           |           |   |           |           |           |
|---|-----------|-----------|-----------|---|-----------|-----------|-----------|
| C | 4.513413  | -0.105604 | -1.031035 | H | 1.585254  | 1.381562  | 1.744490  |
| C | 3.370260  | 0.478922  | -0.426842 | H | 0.276302  | 3.886232  | -0.740818 |
| C | 2.110155  | 0.275310  | -1.020250 | H | -0.342138 | 1.564696  | 1.231766  |
| C | 1.980484  | -0.455921 | -2.188531 | H | -1.871267 | 2.921858  | -1.046351 |
| C | 3.124741  | -0.965357 | -2.819694 | H | -4.106351 | 3.018206  | -0.684785 |
| C | 4.376019  | -0.789861 | -2.244805 | H | -3.978751 | 3.027538  | 1.066630  |
| C | 3.507529  | 1.188247  | 0.849815  | H | -2.582426 | 1.257539  | 2.261783  |
| C | 2.370671  | 2.051851  | 1.386296  | H | 0.345025  | -1.359372 | 2.150200  |
| C | 1.823157  | 3.055866  | 0.399981  | H | 4.593180  | -1.864416 | 1.988411  |
| C | 0.532932  | 3.132548  | -0.001477 | H | 4.371070  | -3.238320 | -0.063854 |
| C | -0.535785 | 2.252185  | 0.417829  | H | -1.330491 | -2.792489 | 1.839355  |
| C | -1.724731 | 2.236187  | -0.211511 | H | -2.202230 | -3.490486 | 0.468269  |
| C | -2.940686 | 1.390427  | 0.089171  | H | -1.268966 | -0.695494 | -1.254832 |
| C | -4.138398 | 2.374158  | 0.201582  | H | -2.680341 | -1.696369 | -1.582961 |
| C | -2.739551 | 0.607761  | 1.401672  | H | -2.815964 | 0.871511  | -2.015685 |
| C | 2.838553  | 3.964386  | -0.170575 | H | -4.785494 | -0.752663 | -2.059115 |
| C | 2.235431  | -3.077291 | -0.138476 | H | -6.292071 | 2.481944  | 0.088386  |
| C | 1.070204  | -2.587855 | 0.513316  | H | -5.723985 | 1.324678  | 1.272442  |
| C | 1.213857  | -1.798688 | 1.675084  | H | -7.033666 | -0.680339 | -1.831216 |
| C | 2.471240  | -1.513924 | 2.182298  | H | 3.102214  | 5.451484  | -1.291006 |
| C | 3.609814  | -2.074388 | 1.578363  | O | 2.184489  | -3.776319 | -1.288348 |
| C | 3.492860  | -2.840417 | 0.431577  | O | -1.673359 | -0.311338 | 1.305794  |
| C | -0.243254 | -2.916943 | -0.039996 | O | -4.444060 | -2.346802 | 1.126578  |
| C | -1.513509 | -2.695577 | 0.766766  | O | 4.530985  | 1.061291  | 1.545549  |
| C | -2.241661 | -1.377298 | 0.518809  | O | -3.894549 | -0.225045 | 1.681965  |

|   |           |           |           |   |           |           |           |
|---|-----------|-----------|-----------|---|-----------|-----------|-----------|
| C | -2.294943 | -0.900187 | -0.939146 | O | 4.037435  | 3.846032  | 0.035319  |
| C | -3.162193 | 0.381138  | -1.095014 | O | -8.040861 | 0.584089  | -0.606118 |
| C | -4.608405 | 0.036897  | -1.328874 | O | 2.338977  | 4.943545  | -0.957668 |
| C | -5.663354 | 0.621635  | -0.736631 | O | 2.564383  | -0.679409 | 3.270323  |
| C | -5.522892 | 1.723955  | 0.272815  | O | -0.361341 | -3.443406 | -1.161422 |
| C | -7.006909 | 0.140740  | -1.084663 | H | 0.719766  | -1.354028 | -3.340629 |
| C | -3.657081 | -1.435720 | 1.120384  | H | 5.612021  | 0.361001  | 0.425143  |
| H | 1.209713  | 0.637992  | -0.547068 | H | 3.456410  | -0.292082 | 3.288910  |
| H | 3.029983  | -1.524964 | -3.746416 | H | 1.228594  | -3.795109 | -1.557252 |
| H | 5.262095  | -1.214644 | -2.704387 | O | 0.711353  | -0.643295 | -2.680245 |
| H | 2.779573  | 2.561368  | 2.263593  | O | 5.740936  | -0.041834 | -0.470782 |

**Table S5.** Atomic coordinates (Å) of **1a-2** obtained at the B3LYP/6-31G(d,p) level of theory in the gas phase.

|   |           |           |           |   |           |           |           |
|---|-----------|-----------|-----------|---|-----------|-----------|-----------|
| C | 0.352482  | -1.443074 | 2.635071  | H | 3.430767  | -3.444403 | 0.505144  |
| C | 1.477298  | -1.853232 | 1.870497  | H | 1.563115  | -1.285079 | -2.590825 |
| C | 2.622198  | -1.028943 | 1.839737  | H | -0.317139 | -2.548131 | -0.471921 |
| C | 2.660880  | 0.160862  | 2.551213  | H | -0.514965 | -0.457582 | -2.694405 |
| C | 1.513169  | 0.588163  | 3.244366  | H | -2.839415 | -2.770556 | -1.167372 |
| C | 0.373905  | -0.200395 | 3.280366  | H | -3.301096 | -2.034431 | -2.696166 |
| C | 1.408536  | -3.109521 | 1.117907  | H | -2.823526 | 0.471786  | -3.107878 |
| C | 2.439433  | -3.426540 | 0.046347  | H | 0.416690  | 2.081915  | -2.082696 |
| C | 2.452940  | -2.479261 | -1.143114 | H | 4.548073  | 1.022037  | -1.825918 |
| C | 1.367394  | -1.915084 | -1.729938 | H | 4.718735  | 2.151845  | 0.375785  |
| C | -0.009718 | -1.919473 | -1.298282 | H | -1.071099 | 3.859946  | -1.253408 |
| C | -0.870915 | -1.043747 | -1.850924 | H | -1.766893 | 3.953605  | 0.374076  |
| C | -2.255818 | -0.713929 | -1.326578 | H | -0.369856 | 0.741831  | 0.394980  |
| C | -3.251571 | -1.859675 | -1.615866 | H | -1.640134 | 1.239552  | 1.511894  |
| C | -2.641732 | 0.602742  | -2.041087 | H | -1.556765 | -1.217241 | 0.661725  |
| C | 3.753958  | -2.135142 | -1.757372 | H | -3.530743 | -0.206307 | 1.935904  |
| C | 2.658654  | 2.737252  | 0.417352  | H | -5.235288 | -2.538194 | -1.080532 |
| C | 1.417674  | 2.736865  | -0.271418 | H | -5.204693 | -0.891628 | -1.670969 |
| C | 1.348954  | 2.114481  | -1.537548 | H | -5.714984 | -0.760299 | 2.212399  |
| C | 2.455048  | 1.478600  | -2.081774 | H | 5.609680  | -2.403778 | -1.597656 |
| C | 3.680174  | 1.508984  | -1.393537 | O | 2.804778  | 3.273522  | 1.659395  |
| C | 3.780727  | 2.141898  | -0.165783 | O | -1.612845 | 1.547409  | -1.851847 |
| C | 0.232950  | 3.304539  | 0.385968  | O | -4.100537 | 2.801465  | 0.143805  |
| C | -1.137651 | 3.351817  | -0.285703 | O | 0.485904  | -3.922007 | 1.309928  |
| C | -1.837494 | 2.009364  | -0.505590 | O | -3.807888 | 1.237887  | -1.466142 |

|   |           |           |           |   |           |           |           |
|---|-----------|-----------|-----------|---|-----------|-----------|-----------|
| C | -1.446187 | 0.900879  | 0.489872  | O | 3.926817  | -1.396629 | -2.726435 |
| C | -2.176395 | -0.436912 | 0.208594  | O | -6.887511 | -1.625688 | 0.801335  |
| C | -3.502979 | -0.554569 | 0.903668  | O | 4.803743  | -2.708166 | -1.138168 |
| C | -4.607103 | -1.097826 | 0.362512  | O | 2.328492  | 0.842395  | -3.288205 |
| C | -4.654727 | -1.610056 | -1.050835 | O | 0.308907  | 3.775886  | 1.534889  |
| C | -5.820930 | -1.166270 | 1.184646  | H | 3.599790  | 1.827644  | 2.602133  |
| C | -3.370998 | 2.120391  | -0.527760 | H | -0.564389 | -3.056746 | 2.297133  |
| H | 3.498445  | -1.320898 | 1.272824  | H | 2.980995  | 0.108177  | -3.308251 |
| H | 1.531352  | 1.536036  | 3.773620  | H | 1.902556  | 3.612407  | 1.918688  |
| H | -0.506286 | 0.114693  | 3.830681  | O | 3.827223  | 0.874567  | 2.588799  |
| H | 2.227514  | -4.447065 | -0.289047 | O | -0.770005 | -2.190426 | 2.737650  |



**Table S6.** Atomic coordinates (Å) of **1a-3** obtained at the B3LYP/6-31G(d,p) level of theory in the gas phase.

|   |           |           |           |   |           |           |           |
|---|-----------|-----------|-----------|---|-----------|-----------|-----------|
| C | 4.484219  | -0.161242 | -1.062397 | H | 1.604092  | 1.416334  | 1.712014  |
| C | 3.353243  | 0.451235  | -0.460784 | H | 0.289542  | 3.890479  | -0.783284 |
| C | 2.086529  | 0.255974  | -1.043943 | H | -0.323447 | 1.558608  | 1.187000  |
| C | 1.939238  | -0.491824 | -2.199119 | H | -1.869870 | 2.925448  | -1.073143 |
| C | 3.071788  | -1.031876 | -2.826754 | H | -4.099605 | 3.022117  | -0.712761 |
| C | 4.328552  | -0.866183 | -2.262266 | H | -3.963809 | 3.049509  | 1.037853  |
| C | 3.512522  | 1.186085  | 0.797590  | H | -2.568562 | 1.287062  | 2.244878  |
| C | 2.392998  | 2.073644  | 1.336470  | H | 0.332450  | -1.326279 | 2.156571  |
| C | 1.834354  | 3.072446  | 0.349588  | H | 4.580714  | -1.844023 | 2.029616  |
| C | 0.541949  | 3.130606  | -0.047182 | H | 4.367571  | -3.248882 | -0.002196 |
| C | -0.522148 | 2.248809  | 0.376246  | H | -1.339629 | -2.774933 | 1.859862  |
| C | -1.718013 | 2.238262  | -0.240579 | H | -2.208531 | -3.480352 | 0.490688  |
| C | -2.935485 | 1.398872  | 0.072759  | H | -1.277610 | -0.707004 | -1.256983 |
| C | -4.129519 | 2.387571  | 0.180468  | H | -2.694171 | -1.705916 | -1.568327 |
| C | -2.731950 | 0.628970  | 1.392338  | H | -2.821359 | 0.858015  | -2.027180 |
| C | 2.757122  | 4.062940  | -0.255264 | H | -4.797230 | -0.758923 | -2.045957 |
| C | 2.232957  | -3.082685 | -0.094001 | H | -6.283296 | 2.501465  | 0.076478  |
| C | 1.065131  | -2.579303 | 0.542247  | H | -5.713457 | 1.354242  | 1.269410  |
| C | 1.203219  | -1.774008 | 1.693143  | H | -7.043848 | -0.677775 | -1.807797 |
| C | 2.458213  | -1.484581 | 2.203975  | H | 4.572578  | 4.577233  | -0.273080 |
| C | 3.599153  | -2.056963 | 1.616449  | O | 2.187355  | -3.799941 | -1.232871 |
| C | 3.487203  | -2.840618 | 0.480825  | O | -1.669637 | -0.294973 | 1.301520  |
| C | -0.246259 | -2.913454 | -0.013991 | O | -4.447749 | -2.322544 | 1.155166  |
| C | -1.519532 | -2.684562 | 0.786129  | O | 4.552357  | 1.082577  | 1.472471  |
| C | -2.244850 | -1.366828 | 0.527841  | O | -3.888577 | -0.197011 | 1.686194  |

|   |           |           |           |   |           |           |           |
|---|-----------|-----------|-----------|---|-----------|-----------|-----------|
| C | -2.302741 | -0.904571 | -0.934554 | O | 2.451220  | 4.929124  | -1.057883 |
| C | -3.165732 | 0.378426  | -1.100159 | O | -8.041521 | 0.601447  | -0.590291 |
| C | -4.614204 | 0.037087  | -1.324227 | O | 4.029803  | 3.904671  | 0.180150  |
| C | -5.664549 | 0.630903  | -0.732816 | O | 2.543790  | -0.633136 | 3.278995  |
| C | -5.515772 | 1.742781  | 0.264899  | O | -0.359041 | -3.451267 | -1.130337 |
| C | -7.011159 | 0.150567  | -1.069535 | H | 0.658261  | -1.387237 | -3.330825 |
| C | -3.657726 | -1.414285 | 1.136156  | H | 5.602191  | 0.326217  | 0.371593  |
| H | 1.194880  | 0.642311  | -0.573346 | H | 3.448483  | -0.280647 | 3.326901  |
| H | 2.962806  | -1.605942 | -3.742992 | H | 1.233975  | -3.817398 | -1.509876 |
| H | 5.205278  | -1.312921 | -2.718861 | O | 0.665584  | -0.664002 | -2.684168 |
| H | 2.818755  | 2.585018  | 2.204255  | O | 5.716460  | -0.104817 | -0.513675 |

**Table S7.** Atomic coordinates (Å) of **1a-4** obtained at the B3LYP/6-31G(d,p) level of theory in the gas phase.

|   |           |           |           |   |           |           |           |
|---|-----------|-----------|-----------|---|-----------|-----------|-----------|
| C | -2.867989 | 1.147882  | -2.106212 | H | -2.949813 | -2.993662 | -1.653822 |
| C | -3.035665 | -0.214854 | -1.733438 | H | -0.601309 | -2.834834 | 1.871396  |
| C | -4.323875 | -0.674650 | -1.384576 | H | 0.589758  | -2.091716 | -0.892947 |
| C | -5.415073 | 0.178236  | -1.407862 | H | 1.662279  | -2.149089 | 1.975482  |
| C | -5.240951 | 1.517456  | -1.799226 | H | 3.526750  | -3.060538 | -0.744066 |
| C | -3.985427 | 1.992247  | -2.142091 | H | 4.182449  | -3.052962 | 0.887747  |
| C | -1.875573 | -1.105217 | -1.733345 | H | 3.755639  | -1.029020 | 2.425148  |
| C | -1.999028 | -2.575720 | -1.326992 | H | 0.392921  | 0.736069  | 2.538231  |
| C | -1.830319 | -2.760937 | 0.172666  | H | -3.763380 | -0.199652 | 2.234432  |
| C | -0.629648 | -2.668481 | 0.799675  | H | -4.132441 | 1.815070  | 0.834050  |
| C | 0.605833  | -2.271072 | 0.173910  | H | 1.824557  | 2.734561  | 2.504289  |
| C | 1.695536  | -1.968365 | 0.901778  | H | 2.356042  | 3.584490  | 1.043981  |
| C | 2.965702  | -1.325654 | 0.379947  | H | 0.880957  | 0.660281  | -0.277005 |
| C | 3.994970  | -2.421001 | 0.012434  | H | 2.015723  | 1.654714  | -1.192189 |
| C | 3.443908  | -0.444243 | 1.559424  | H | 2.000711  | -0.922254 | -1.525510 |
| C | -3.001463 | -3.048409 | 1.020707  | H | 3.814104  | 0.649482  | -2.423660 |
| C | -2.085421 | 2.439759  | 0.890848  | H | 5.892754  | -2.677172 | -0.995860 |
| C | -0.775831 | 2.137535  | 1.359971  | H | 5.940781  | -1.469982 | 0.269941  |
| C | -0.590417 | 0.998113  | 2.174337  | H | 5.943191  | 0.417156  | -3.159970 |
| C | -1.649247 | 0.161187  | 2.490019  | H | -4.794237 | -3.628149 | 0.977740  |
| C | -2.933853 | 0.460659  | 1.999843  | O | -2.356436 | 3.520340  | 0.133616  |
| C | -3.146524 | 1.585776  | 1.220113  | O | 2.406184  | 0.432452  | 1.931648  |
| C | 0.346936  | 2.979639  | 0.938752  | O | 4.640833  | 2.557049  | 0.427700  |
| C | 1.779114  | 2.732089  | 1.410019  | O | -0.747891 | -0.686856 | -2.060031 |
| C | 2.467909  | 1.457339  | 0.918560  | O | 4.536850  | 0.434508  | 1.203352  |

|   |           |           |           |   |           |           |           |
|---|-----------|-----------|-----------|---|-----------|-----------|-----------|
| C | 1.939562  | 0.889874  | -0.412402 | O | -3.053179 | -2.912821 | 2.243074  |
| C | 2.684483  | -0.401930 | -0.844450 | O | 7.291214  | -0.912969 | -2.433069 |
| C | 3.914841  | -0.126160 | -1.664635 | O | -4.070678 | -3.496766 | 0.335083  |
| C | 5.082050  | -0.783791 | -1.553400 | O | -1.412128 | -0.925097 | 3.288432  |
| C | 5.314362  | -1.867744 | -0.537703 | O | 0.172579  | 3.949821  | 0.178903  |
| C | 6.181521  | -0.399224 | -2.446501 | H | -7.304764 | 0.366630  | -1.109082 |
| C | 3.994067  | 1.616213  | 0.807866  | H | -1.017644 | 0.930776  | -2.373226 |
| H | -4.484752 | -1.701040 | -1.082964 | H | -2.064771 | -1.627745 | 3.068523  |
| H | -6.096642 | 2.187650  | -1.828396 | H | -1.480012 | 3.944985  | -0.059826 |
| H | -3.839660 | 3.028682  | -2.422352 | O | -6.635254 | -0.333606 | -1.052033 |
| H | -1.206509 | -3.106039 | -1.860353 | O | -1.670796 | 1.675694  | -2.428918 |

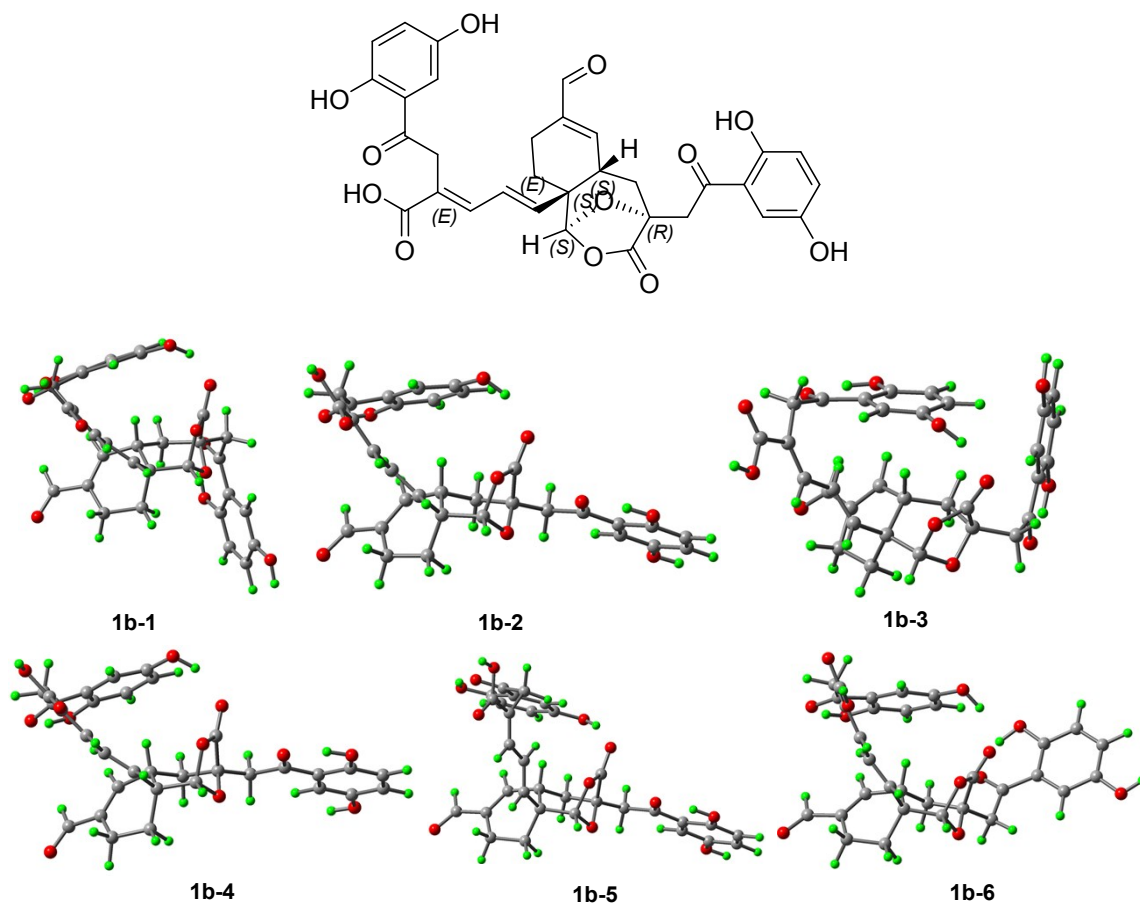

**Figure S10.** Six optimized conformers of **1b**.

**Table S8.** Conformational analysis of the six optimized conformers of **1b** in the gas phase (T = 298.15 K)

| Conformer   | E (Hartree)  | C (Hartree) | G (kcal/mol) | $\Delta G$ (kcal/mol) | Population |
|-------------|--------------|-------------|--------------|-----------------------|------------|
| <b>1b-1</b> | -2138.816862 | 0.475607    | -1341829.238 | 0                     | 52.07%     |
| <b>1b-2</b> | -2138.817508 | 0.477072    | -1341828.724 | 0.51371057            | 21.87%     |
| <b>1b-3</b> | -2138.818121 | 0.478368    | -1341828.295 | 0.942638346           | 10.60%     |
| <b>1b-4</b> | -2138.816881 | 0.477272    | -1341828.205 | 1.032648294           | 9.10%      |
| <b>1b-5</b> | -2138.815366 | 0.476522    | -1341827.725 | 1.512956539           | 4.04%      |
| <b>1b-6</b> | -2138.815463 | 0.477144    | -1341827.396 | 1.842254647           | 2.32%      |

Electronic energy obtained at M062X/6-311+G(2d,p) (Solvent=Methanol) level of theory; Thermal correction to Gibbs free energy obtained at B3LYP/6-31G(d), EmpiricalDispersion=GD3 level of theory; Gibbs free energy (E + C); The relative Gibbs free energy; The Boltzmann distribution of each conformer.

**Table S9.** Experimental and calculated  $^{13}\text{C}$ -NMR chemical shifts of **1b**

| No.        | $\delta_{\text{exptl.}}$ | <b>1b</b> - $\delta_{\text{calcd.}}$ |
|------------|--------------------------|--------------------------------------|
| <b>1a</b>  | 156.4                    | 154.9                                |
| <b>2a</b>  | 119.9                    | 118.9                                |
| <b>3a</b>  | 115.5                    | 119.7                                |
| <b>4a</b>  | 150.2                    | 146.2                                |
| <b>5a</b>  | 125.7                    | 129.1                                |
| <b>6a</b>  | 119.4                    | 117.0                                |
| <b>7a</b>  | 203.8                    | 206.7                                |
| <b>8a</b>  | 37.3                     | 45.3                                 |
| <b>9a</b>  | 126.3                    | 122.5                                |
| <b>10a</b> | 141.8                    | 140.5                                |
| <b>11a</b> | 128.2                    | 127.6                                |
| <b>12a</b> | 143.9                    | 145.1                                |
| <b>13a</b> | 43.4                     | 45.9                                 |
| <b>14a</b> | 24.0                     | 25.2                                 |
| <b>15a</b> | 106.5                    | 109.9                                |
| <b>16a</b> | 168.7                    | 165.3                                |
| <b>1b</b>  | 156.4                    | 155.8                                |
| <b>2b</b>  | 120.0                    | 116.4                                |
| <b>3b</b>  | 115.7                    | 114.9                                |
| <b>4b</b>  | 150.3                    | 144.6                                |
| <b>5b</b>  | 125.7                    | 124.0                                |
| <b>6b</b>  | 119.5                    | 117.6                                |
| <b>7b</b>  | 201.0                    | 200.1                                |
| <b>8b</b>  | 41.5                     | 43.3                                 |
| <b>9b</b>  | 77.7                     | 81.3                                 |
| <b>10b</b> | 32.7                     | 32.0                                 |
| <b>11b</b> | 34.6                     | 36.0                                 |
| <b>12b</b> | 149.6                    | 152.7                                |
| <b>13b</b> | 141.4                    | 139.9                                |
| <b>14b</b> | 19.0                     | 21.5                                 |
| <b>15b</b> | 193.9                    | 194.3                                |
| <b>16b</b> | 173.4                    | 174.8                                |

**Table S10.** Parameters of calculated  $^{13}\text{C}$  NMR method for **1a** and **1b**

|                | <b>1a (green)</b>      | <b>1b (red)</b>        |
|----------------|------------------------|------------------------|
| Liner equation | $y = 0.9649x + 4.5486$ | $y = 0.9787x + 2.6778$ |
| $R^2$          | 0.9952                 | 0.9973                 |
| MAE            | 3.1                    | 2.4                    |
| CMAE           | 2.7                    | 2.2                    |

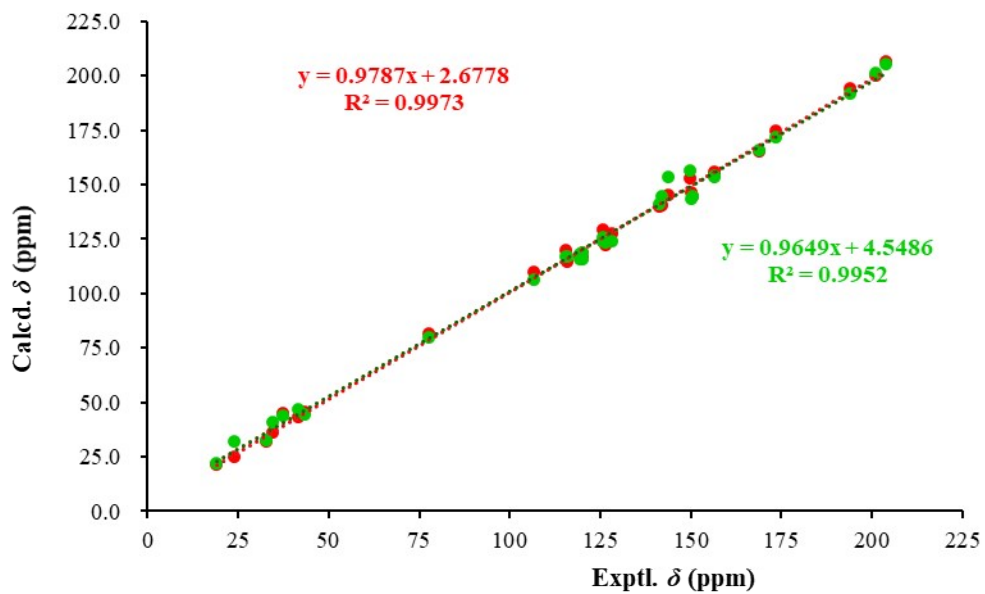

**Table S11.** Atomic coordinates (Å) of **1b-1** obtained at the B3LYP/6-31G(d,p) level of theory in the gas phase.

|   |           |           |           |   |           |           |           |
|---|-----------|-----------|-----------|---|-----------|-----------|-----------|
| C | -2.647976 | 0.638272  | 2.776362  | H | -3.276376 | -2.252624 | 1.046006  |
| C | -3.36645  | -0.300271 | 1.989895  | H | 0.189671  | -1.165065 | 3.298456  |
| C | -2.768683 | -1.542589 | 1.687846  | H | -0.846209 | 1.019892  | 3.874379  |
| C | -1.488765 | -1.845504 | 2.124477  | H | -6.504992 | -0.484558 | 0.604327  |
| C | -0.806302 | -0.92316  | 2.942973  | H | -5.583565 | -1.822985 | 1.255105  |
| C | -1.378158 | 0.297809  | 3.263856  | H | -3.994596 | -1.482995 | -2.497225 |
| C | -4.652909 | 0.086727  | 1.397657  | H | -3.021387 | 0.512977  | -0.32933  |
| C | -5.501558 | -0.919581 | 0.637489  | H | -1.775169 | -0.718825 | -2.831881 |
| C | -5.116035 | -1.347206 | -0.768916 | H | 0.473777  | 2.418809  | -2.382345 |
| C | -4.051118 | -0.994087 | -1.526884 | H | -0.500847 | 1.605639  | -3.604995 |
| C | -2.950008 | -0.115987 | -1.203989 | H | 0.638036  | -0.620037 | -2.952086 |
| C | -1.821277 | -0.101594 | -1.933844 | H | 5.665974  | 1.448097  | 0.942195  |
| C | -0.567425 | 0.681324  | -1.629162 | H | 9.601521  | -0.106514 | 0.323587  |
| C | -0.486205 | 1.922446  | -2.556294 | H | 8.660583  | -2.073924 | -0.854156 |
| C | 0.632291  | -0.238699 | -1.931173 | H | 3.715632  | 1.479766  | -0.078026 |
| C | -6.043239 | -2.324219 | -1.408395 | H | 3.409056  | 0.468439  | 1.326067  |
| C | 6.623078  | -1.446068 | -0.635498 | H | 1.339588  | 2.336034  | 0.048717  |
| C | 5.752629  | -0.441975 | -0.131462 | H | 0.983165  | 1.324658  | 1.455719  |
| C | 6.304004  | 0.6706    | 0.539857  | H | -0.893308 | 0.309191  | 0.468334  |
| C | 7.674038  | 0.795628  | 0.707977  | H | -1.478082 | 2.585652  | 1.188009  |
| C | 8.525826  | -0.200132 | 0.198553  | H | -1.4552   | 3.849023  | -2.791268 |
| C | 8.006519  | -1.302601 | -0.461918 | H | -2.573919 | 2.505589  | -2.701225 |
| C | 4.306232  | -0.586927 | -0.30847  | H | -2.756065 | 4.388533  | 0.719707  |
| C | 3.373576  | 0.487603  | 0.230451  | H | -3.981807 | 1.951672  | 2.563637  |
| C | 1.938436  | 0.306391  | -0.218357 | H | 0.025712  | -2.855359 | 1.558863  |



|   |           |           |           |   |           |           |           |
|---|-----------|-----------|-----------|---|-----------|-----------|-----------|
| C | 0.972974  | 1.354153  | 0.361965  | H | 5.19117   | -2.479058 | -1.298259 |
| C | -0.483314 | 1.123955  | -0.137939 | H | 9.109041  | 1.857776  | 1.420975  |
| C | -1.303936 | 2.346228  | 0.140649  | H | -7.617222 | -3.308492 | -1.095418 |
| C | -1.823764 | 3.142415  | -0.811167 | O | -5.104158 | 1.235778  | 1.54424   |
| C | -1.636225 | 2.895583  | -2.283944 | O | -3.184951 | 5.069182  | -1.142942 |
| C | -2.643914 | 4.282522  | -0.379564 | O | 8.140574  | 1.898849  | 1.370556  |
| C | 1.358851  | -1.088088 | 0.03153   | O | -7.069991 | -2.671948 | -0.597793 |

**Table S12.** Atomic coordinates (Å) of **1b-2** obtained at the B3LYP/6-31G(d,p) level of theory in the gas phase.

|   |           |           |           |   |           |           |           |
|---|-----------|-----------|-----------|---|-----------|-----------|-----------|
| C | -2.647976 | 0.638272  | 2.776362  | H | -3.276376 | -2.252624 | 1.046006  |
| C | -3.36645  | -0.300271 | 1.989895  | H | 0.189671  | -1.165065 | 3.298456  |
| C | -2.768683 | -1.542589 | 1.687846  | H | -0.846209 | 1.019892  | 3.874379  |
| C | -1.488765 | -1.845504 | 2.124477  | H | -6.504992 | -0.484558 | 0.604327  |
| C | -0.806302 | -0.92316  | 2.942973  | H | -5.583565 | -1.822985 | 1.255105  |
| C | -1.378158 | 0.297809  | 3.263856  | H | -3.994596 | -1.482995 | -2.497225 |
| C | -4.652909 | 0.086727  | 1.397657  | H | -3.021387 | 0.512977  | -0.32933  |
| C | -5.501558 | -0.919581 | 0.637489  | H | -1.775169 | -0.718825 | -2.831881 |
| C | -5.116035 | -1.347206 | -0.768916 | H | 0.473777  | 2.418809  | -2.382345 |
| C | -4.051118 | -0.994087 | -1.526884 | H | -0.500847 | 1.605639  | -3.604995 |
| C | -2.950008 | -0.115987 | -1.203989 | H | 0.638036  | -0.620037 | -2.952086 |
| C | -1.821277 | -0.101594 | -1.933844 | H | 5.665974  | 1.448097  | 0.942195  |
| C | -0.567425 | 0.681324  | -1.629162 | H | 9.601521  | -0.106514 | 0.323587  |
| C | -0.486205 | 1.922446  | -2.556294 | H | 8.660583  | -2.073924 | -0.854156 |
| C | 0.632291  | -0.238699 | -1.931173 | H | 3.715632  | 1.479766  | -0.078026 |
| C | -6.043239 | -2.324219 | -1.408395 | H | 3.409056  | 0.468439  | 1.326067  |
| C | 6.623078  | -1.446068 | -0.635498 | H | 1.339588  | 2.336034  | 0.048717  |
| C | 5.752629  | -0.441975 | -0.131462 | H | 0.983165  | 1.324658  | 1.455719  |
| C | 6.304004  | 0.6706    | 0.539857  | H | -0.893308 | 0.309191  | 0.468334  |
| C | 7.674038  | 0.795628  | 0.707977  | H | -1.478082 | 2.585652  | 1.188009  |
| C | 8.525826  | -0.200132 | 0.198553  | H | -1.4552   | 3.849023  | -2.791268 |
| C | 8.006519  | -1.302601 | -0.461918 | H | -2.573919 | 2.505589  | -2.701225 |
| C | 4.306232  | -0.586927 | -0.30847  | H | -2.756065 | 4.388533  | 0.719707  |
| C | 3.373576  | 0.487603  | 0.230451  | H | -3.981807 | 1.951672  | 2.563637  |
| C | 1.938436  | 0.306391  | -0.218357 | H | 0.025712  | -2.855359 | 1.558863  |

|   |           |           |           |   |           |           |           |
|---|-----------|-----------|-----------|---|-----------|-----------|-----------|
| C | 0.972974  | 1.354153  | 0.361965  | H | 5.19117   | -2.479058 | -1.298259 |
| C | -0.483314 | 1.123955  | -0.137939 | H | 9.109041  | 1.857776  | 1.420975  |
| C | -1.303936 | 2.346228  | 0.140649  | H | -7.617222 | -3.308492 | -1.095418 |
| C | -1.823764 | 3.142415  | -0.811167 | O | -5.104158 | 1.235778  | 1.54424   |
| C | -1.636225 | 2.895583  | -2.283944 | O | -3.184951 | 5.069182  | -1.142942 |
| C | -2.643914 | 4.282522  | -0.379564 | O | 8.140574  | 1.898849  | 1.370556  |
| C | 1.358851  | -1.088088 | 0.03153   | O | -7.069991 | -2.671948 | -0.597793 |

**Table S13.** Atomic coordinates (Å) of **1b-3** obtained at the B3LYP/6-31G(d,p) level of theory in the gas phase.

|   |           |           |           |   |           |           |           |
|---|-----------|-----------|-----------|---|-----------|-----------|-----------|
| C | -0.759887 | -1.801126 | 1.856241  | H | -2.824661 | -2.194512 | -0.851325 |
| C | -1.96664  | -1.821536 | 1.107345  | H | 1.376653  | -2.945523 | -0.528505 |
| C | -1.926826 | -2.222311 | -0.245464 | H | 1.344306  | -2.227293 | 1.840666  |
| C | -0.731627 | -2.580245 | -0.848044 | H | -5.301148 | -1.315369 | 1.783383  |
| C | 0.447129  | -2.615244 | -0.077754 | H | -4.645729 | -2.503849 | 0.682185  |
| C | 0.432414  | -2.226028 | 1.252407  | H | -4.657648 | 0.883672  | -1.635016 |
| C | -3.206339 | -1.321392 | 1.715484  | H | -2.430697 | 0.564846  | 0.492951  |
| C | -4.543525 | -1.460555 | 1.006915  | H | -2.621291 | 1.993369  | -2.201823 |
| C | -4.904327 | -0.578783 | -0.176457 | H | 0.385821  | 3.866415  | -0.584855 |
| C | -4.199443 | 0.414013  | -0.769198 | H | -1.154638 | 4.192398  | -1.376743 |
| C | -2.872677 | 0.882606  | -0.439475 | H | -0.480233 | 2.521728  | -3.23073  |
| C | -2.155365 | 1.650091  | -1.277484 | H | 3.430879  | -1.451524 | -1.387533 |
| C | -0.720405 | 2.07532   | -1.077433 | H | 5.073337  | -3.351732 | 2.07363   |
| C | -0.663956 | 3.559235  | -0.629527 | H | 6.086831  | -1.206463 | 2.795212  |
| C | -0.007959 | 1.944466  | -2.436248 | H | 3.671242  | 0.215103  | -2.704478 |
| C | -6.241139 | -0.932517 | -0.720964 | H | 3.675159  | 1.98117   | -2.631577 |
| C | 5.352068  | -0.096611 | 1.114576  | H | 2.034094  | 2.028752  | 0.169053  |
| C | 4.592452  | -0.150023 | -0.085962 | H | 1.959804  | 0.266653  | 0.267999  |
| C | 4.026733  | -1.37987  | -0.486151 | H | -0.33203  | 0.150477  | -0.191641 |
| C | 4.197552  | -2.522176 | 0.278083  | H | 0.029775  | 0.85497   | 2.137688  |
| C | 4.941381  | -2.458143 | 1.468893  | H | -1.101082 | 4.748383  | 1.130715  |
| C | 5.511289  | -1.262167 | 1.877535  | H | -2.417009 | 3.700701  | 0.644997  |
| C | 4.358126  | 1.080973  | -0.844915 | H | -0.783753 | 2.119772  | 3.828668  |
| C | 3.450146  | 1.074644  | -2.067596 | H | -1.618051 | -1.050702 | 3.3566    |
| C | 1.941748  | 1.104754  | -1.746483 | H | 0.093416  | -2.534393 | -2.566604 |

|   |           |          |           |   |           |           |           |
|---|-----------|----------|-----------|---|-----------|-----------|-----------|
| C | 1.56141   | 1.138139 | -0.255173 | H | 5.691392  | 1.74417   | 0.906977  |
| C | 0.02371   | 1.176827 | -0.049138 | H | 3.752071  | -4.38696  | 0.480495  |
| C | -0.271472 | 1.563822 | 1.368587  | H | -7.526686 | -0.49415  | -2.019357 |
| C | -0.871803 | 2.712413 | 1.728796  | O | -3.201917 | -0.825739 | 2.85601   |
| C | -1.324158 | 3.750933 | 0.738094  | O | -1.678244 | 3.927786  | 3.612157  |
| C | -1.126589 | 2.935733 | 3.158948  | O | 3.617577  | -3.680551 | -0.171628 |
| C | 1.14265   | 0.001757 | -2.454822 | O | -6.650209 | -0.15881  | -1.753415 |

**Table S14.** Atomic coordinates (Å) of **1b-4** obtained at the B3LYP/6-31G(d,p) level of theory in the gas phase.

|   |           |           |           |   |           |           |           |
|---|-----------|-----------|-----------|---|-----------|-----------|-----------|
| C | -2.641604 | 0.634362  | 2.777577  | H | -3.272522 | -2.254388 | 1.044534  |
| C | -3.361211 | -0.303241 | 1.991014  | H | 0.196574  | -1.169827 | 3.29372   |
| C | -2.763914 | -1.545201 | 1.686596  | H | -0.838429 | 1.014517  | 3.87378   |
| C | -1.48336  | -1.848598 | 2.120976  | H | -6.501919 | -0.48555  | 0.610266  |
| C | -0.799807 | -0.92734  | 2.939814  | H | -5.579806 | -1.824917 | 1.258128  |
| C | -1.371153 | 0.293274  | 3.262934  | H | -3.997265 | -1.481538 | -2.496662 |
| C | -4.648506 | 0.084501  | 1.4011    | H | -3.019939 | 0.511648  | -0.328099 |
| C | -5.498564 | -0.9209   | 0.641333  | H | -1.777561 | -0.716859 | -2.834167 |
| C | -5.115613 | -1.347193 | -0.766223 | H | 0.471475  | 2.420415  | -2.384341 |
| C | -4.051884 | -0.993703 | -1.525677 | H | -0.504599 | 1.608144  | -3.606407 |
| C | -2.949984 | -0.116271 | -1.203625 | H | 0.636031  | -0.617953 | -2.956761 |
| C | -1.822418 | -0.100843 | -1.935233 | H | 5.65619   | 1.448787  | 0.928469  |
| C | -0.568336 | 0.68198   | -1.631338 | H | 9.598923  | -0.101325 | 0.343201  |
| C | -0.488615 | 1.923974  | -2.557436 | H | 8.659157  | -2.08543  | -0.838412 |
| C | 0.631462  | -0.237328 | -1.935587 | H | 3.71538   | 1.482117  | -0.089178 |
| C | -6.044445 | -2.323061 | -1.405144 | H | 3.41114   | 0.474256  | 1.31843   |
| C | 6.622457  | -1.448202 | -0.629319 | H | 1.339486  | 2.336584  | 0.045032  |
| C | 5.753532  | -0.441399 | -0.132953 | H | 0.985856  | 1.323931  | 1.451823  |
| C | 6.307764  | 0.675011  | 0.536933  | H | -0.891131 | 0.30766   | 0.466304  |
| C | 7.676764  | 0.794403  | 0.707438  | H | -1.477032 | 2.582936  | 1.188769  |
| C | 8.52767   | -0.207819 | 0.205345  | H | -1.458295 | 3.850592  | -2.789328 |
| C | 8.008168  | -1.309027 | -0.451003 | H | -2.576636 | 2.506842  | -2.699249 |
| C | 4.308688  | -0.584846 | -0.313859 | H | -2.755762 | 4.386115  | 0.7236    |
| C | 3.375106  | 0.490294  | 0.22277   | H | -3.975715 | 1.948017  | 2.568319  |
| C | 1.939623  | 0.307535  | -0.224333 | H | 0.030437  | -2.857592 | 1.552164  |

|   |           |           |           |   |           |           |           |
|---|-----------|-----------|-----------|---|-----------|-----------|-----------|
| C | 0.974139  | 1.354164  | 0.358092  | H | 5.191009  | -2.479317 | -1.294688 |
| C | -0.482671 | 1.123285  | -0.139848 | H | 7.589243  | 2.472181  | 1.643471  |
| C | -1.303654 | 2.344832  | 0.140976  | H | -7.618608 | -3.306574 | -1.090624 |
| C | -1.824538 | 3.141914  | -0.809502 | O | -5.099428 | 1.233455  | 1.549562  |
| C | -1.638513 | 2.896614  | -2.282731 | O | -3.186023 | 5.069089  | -1.13788  |
| C | -2.644406 | 4.281492  | -0.375893 | O | 8.271231  | 1.848047  | 1.346822  |
| C | 1.36136   | -1.087491 | 0.025586  | O | -7.070066 | -2.670982 | -0.593213 |

**Table S15.** Atomic coordinates (Å) of **1b-5** obtained at the B3LYP/6-31G(d,p) level of theory in the gas phase.

|   |           |           |           |   |           |           |           |
|---|-----------|-----------|-----------|---|-----------|-----------|-----------|
| C | -3.711628 | 1.074807  | 2.678334  | H | -1.54456  | -1.489705 | 1.963957  |
| C | -3.272839 | -0.181145 | 2.173314  | H | -0.73928  | 2.251423  | 3.862496  |
| C | -1.905368 | -0.530898 | 2.318414  | H | -3.140751 | 2.89575   | 3.654556  |
| C | -1.002742 | 0.336962  | 2.919707  | H | -4.352857 | -3.153659 | 1.317808  |
| C | -1.456347 | 1.580206  | 3.400735  | H | -2.783844 | -2.532404 | 0.837416  |
| C | -2.785593 | 1.939867  | 3.284533  | H | -4.085391 | -1.597161 | -2.618985 |
| C | -4.252313 | -1.044918 | 1.49876   | H | -2.099679 | -0.865262 | -0.348422 |
| C | -3.854607 | -2.337664 | 0.789766  | H | -2.188552 | -0.053215 | -3.294526 |
| C | -4.323766 | -2.297475 | -0.654387 | H | 0.570401  | 2.332951  | -2.820253 |
| C | -3.675079 | -1.592891 | -1.612533 | H | -0.34241  | 1.426342  | -4.022526 |
| C | -2.479175 | -0.828165 | -1.360201 | H | 0.69909   | -0.753223 | -3.151874 |
| C | -1.822841 | -0.086934 | -2.269083 | H | 5.579748  | 1.369767  | 0.860179  |
| C | -0.541745 | 0.675912  | -1.991079 | H | 9.416929  | -0.508484 | 0.677613  |
| C | -0.383414 | 1.829595  | -3.004012 | H | 8.396898  | -2.541287 | -0.309887 |
| C | 0.647888  | -0.305291 | -2.161004 | H | 3.695964  | 1.40703   | -0.252213 |
| C | -5.567774 | -2.99671  | -1.050468 | H | 3.217592  | 0.581242  | 1.223222  |
| C | 6.402503  | -1.756439 | -0.294255 | H | 1.349841  | 2.421776  | -0.417427 |
| C | 5.58319   | -0.641349 | 0.030578  | H | 0.892529  | 1.604283  | 1.086763  |
| C | 6.178985  | 0.507343  | 0.594702  | H | -0.944729 | 0.516194  | 0.140046  |
| C | 7.543662  | 0.560758  | 0.829598  | H | -1.573461 | 2.804953  | 0.607456  |
| C | 8.345357  | -0.545702 | 0.498016  | H | -1.307033 | 3.742391  | -3.452688 |
| C | 7.781788  | -1.685025 | -0.054858 | H | -2.450975 | 2.427684  | -3.331942 |
| C | 4.142117  | -0.709947 | -0.214747 | H | -2.810511 | 4.582903  | -0.08796  |
| C | 3.260906  | 0.480009  | 0.132111  | H | -5.490456 | 0.752677  | 2.160679  |
| C | 1.851368  | 0.347069  | -0.407633 | H | 0.604391  | -0.659759 | 2.483429  |



|   |           |           |           |   |           |           |           |
|---|-----------|-----------|-----------|---|-----------|-----------|-----------|
| C | 0.925312  | 1.503639  | -0.001491 | H | 4.93519   | -2.767575 | -0.91315  |
| C | -0.508943 | 1.251731  | -0.539744 | H | 9.014529  | 1.607188  | 1.489742  |
| C | -1.346331 | 2.486218  | -0.409038 | H | -6.938148 | -4.106168 | -0.394219 |
| C | -1.810725 | 3.199601  | -1.44993  | O | -5.454535 | -0.728707 | 1.448473  |
| C | -1.53407  | 2.834332  | -2.88418  | O | -3.130806 | 5.097596  | -2.023838 |
| C | -2.641876 | 4.37695   | -1.1657   | O | 8.055069  | 1.704701  | 1.380156  |
| C | 1.160295  | -0.985446 | -0.078663 | O | -6.136029 | -3.684286 | -0.032682 |

**Table S16.** Atomic coordinates (Å) of **1b-6** obtained at the B3LYP/6-31G(d,p) level of theory in the gas phase.

|   |           |           |           |   |           |           |           |
|---|-----------|-----------|-----------|---|-----------|-----------|-----------|
| C | -1.549816 | -0.732143 | 2.657221  | H | -2.033374 | -2.780674 | -0.046175 |
| C | -2.253671 | -1.464138 | 1.664796  | H | 1.6302    | -1.630746 | 1.843166  |
| C | -1.523223 | -2.250756 | 0.749462  | H | 0.371259  | -0.25966  | 3.484542  |
| C | -0.13891  | -2.30208  | 0.794023  | H | -5.547532 | -2.066189 | 0.891872  |
| C | 0.546119  | -1.593707 | 1.802092  | H | -4.22247  | -3.188293 | 0.695448  |
| C | -0.151751 | -0.82305  | 2.718954  | H | -3.921237 | -0.925933 | -2.713715 |
| C | -3.706602 | -1.295671 | 1.531432  | H | -2.838254 | 0.248787  | -0.062057 |
| C | -4.508893 | -2.138493 | 0.554571  | H | -2.137208 | 0.637734  | -3.011633 |
| C | -4.478267 | -1.853431 | -0.938019 | H | -0.581976 | 3.856295  | -1.479338 |
| C | -3.80447  | -0.906449 | -1.633807 | H | -1.633397 | 3.34144   | -2.797545 |
| C | -2.887406 | 0.089692  | -1.128671 | H | 0.105523  | 1.558383  | -3.398834 |
| C | -2.059743 | 0.779136  | -1.933045 | H | 5.486148  | 0.884847  | -1.619312 |
| C | -0.979126 | 1.732125  | -1.478367 | H | 7.75091   | -2.535691 | -0.425759 |
| C | -1.418661 | 3.197071  | -1.732804 | H | 6.487674  | -2.651992 | 1.705903  |
| C | 0.274407  | 1.443508  | -2.328699 | H | 3.821777  | 1.870735  | -1.388082 |
| C | -5.330945 | -2.816646 | -1.682641 | H | 3.325765  | 2.943993  | -0.072932 |
| C | 5.270888  | -0.942653 | 1.276742  | H | 0.899673  | 3.049339  | 0.474825  |
| C | 4.959211  | 0.072505  | 0.329569  | H | 1.119773  | 1.519819  | 1.329657  |
| C | 5.684575  | 0.120286  | -0.879015 | H | -0.676009 | 0.457399  | 0.232013  |
| C | 6.686154  | -0.799289 | -1.150954 | H | -1.524284 | 1.953655  | 1.991873  |
| C | 6.97249   | -1.806819 | -0.215114 | H | -2.823942 | 4.641607  | -0.930021 |
| C | 6.27059   | -1.876848 | 0.9788    | H | -3.546373 | 3.093101  | -1.31241  |
| C | 3.862145  | 0.997611  | 0.625108  | H | -3.231907 | 3.310747  | 2.584192  |
| C | 3.278971  | 1.915841  | -0.445517 | H | -3.131419 | 0.07615   | 3.286817  |
| C | 1.816694  | 1.563698  | -0.727178 | H | 1.31477   | -2.533078 | -0.416526 |

|   |           |          |           |   |           |           |           |
|---|-----------|----------|-----------|---|-----------|-----------|-----------|
| C | 0.827959  | 1.961555 | 0.376444  | H | 4.016504  | -0.28669  | 2.520484  |
| C | -0.618252 | 1.531163 | 0.0218    | H | 8.021034  | -1.384703 | -2.404919 |
| C | -1.582304 | 2.220642 | 0.938396  | H | -5.968591 | -3.294828 | -3.384232 |
| C | -2.491033 | 3.128657 | 0.538794  | O | -4.324449 | -0.49454  | 2.254181  |
| C | -2.645841 | 3.561827 | -0.894022 | O | -4.27219  | 4.506103  | 1.317268  |
| C | -3.393531 | 3.689644 | 1.553444  | O | 7.355532  | -0.681169 | -2.339617 |
| C | 1.624597  | 0.095166 | -1.130385 | O | -5.390203 | -2.600367 | -3.017494 |

**Figure S11. Calculated and experimental ECD curves of 1b, 1-1 and 1-2.**

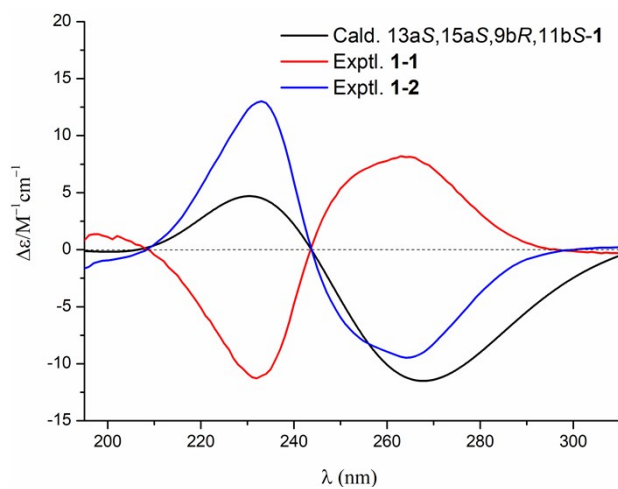

## 1D and 2D NMR spectra of compound 2

Figure S12.  $^1\text{H}$  NMR spectrum (600 MHz,  $\text{CO}(\text{CD})_3$ ) of compound 2.

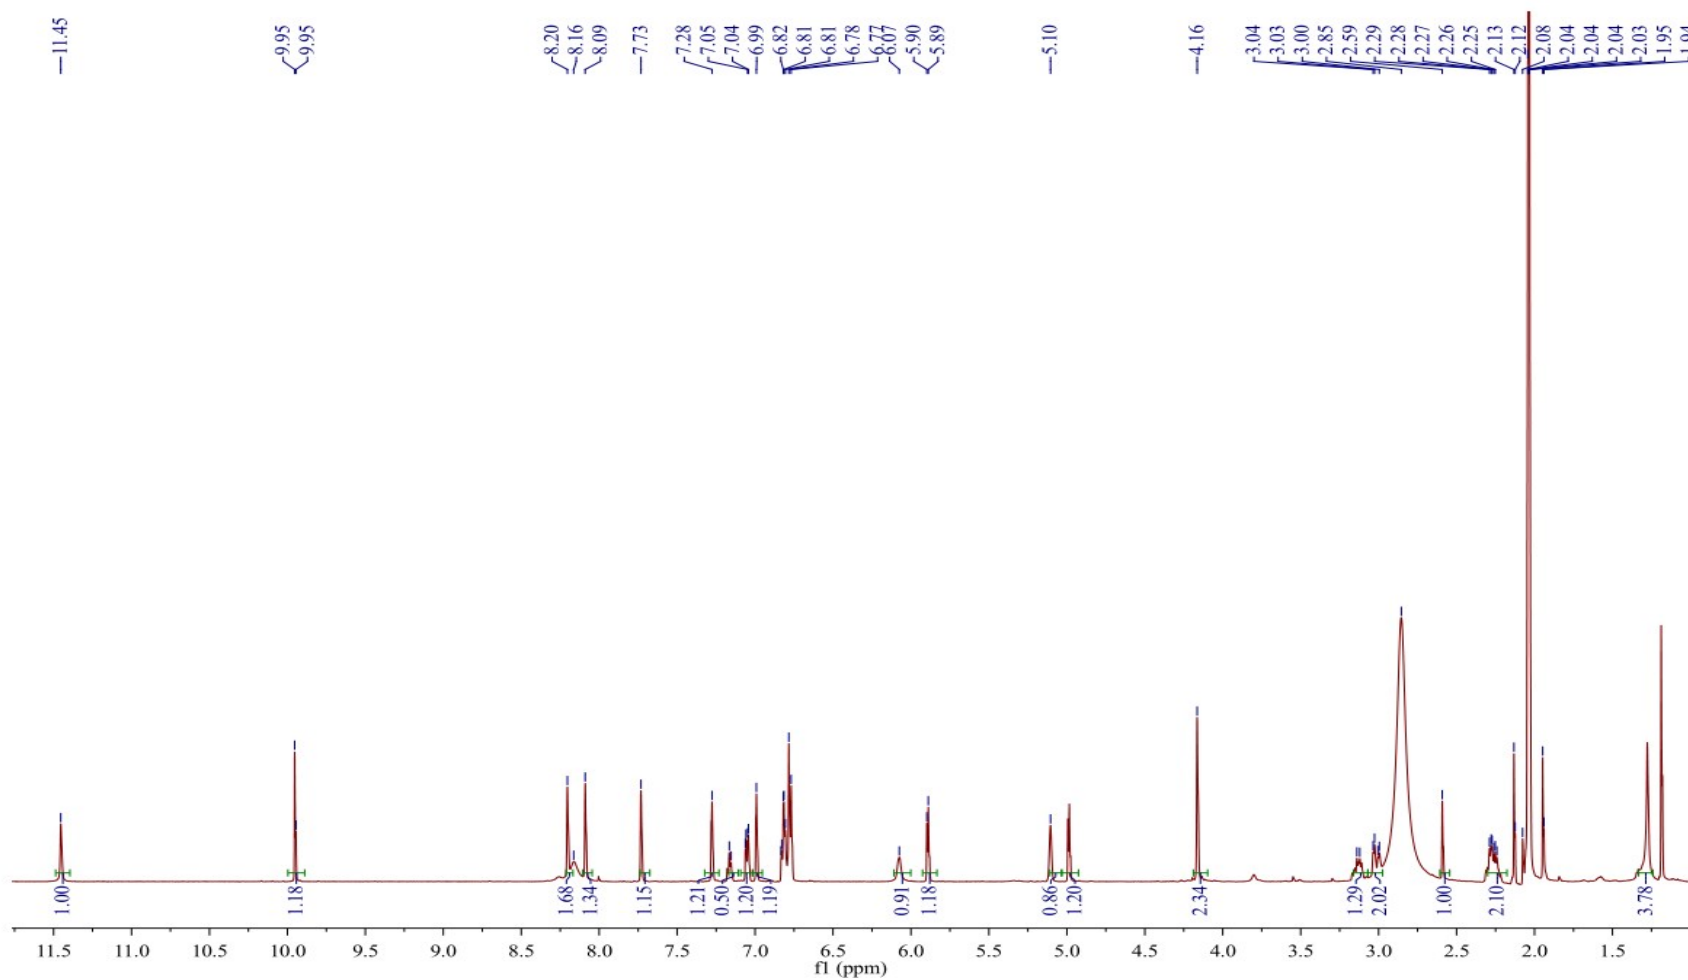

Figure S13.  $^{13}\text{C}$  NMR spectrum (150 MHz,  $\text{CO}(\text{CD})_3$ ) of compound 2.

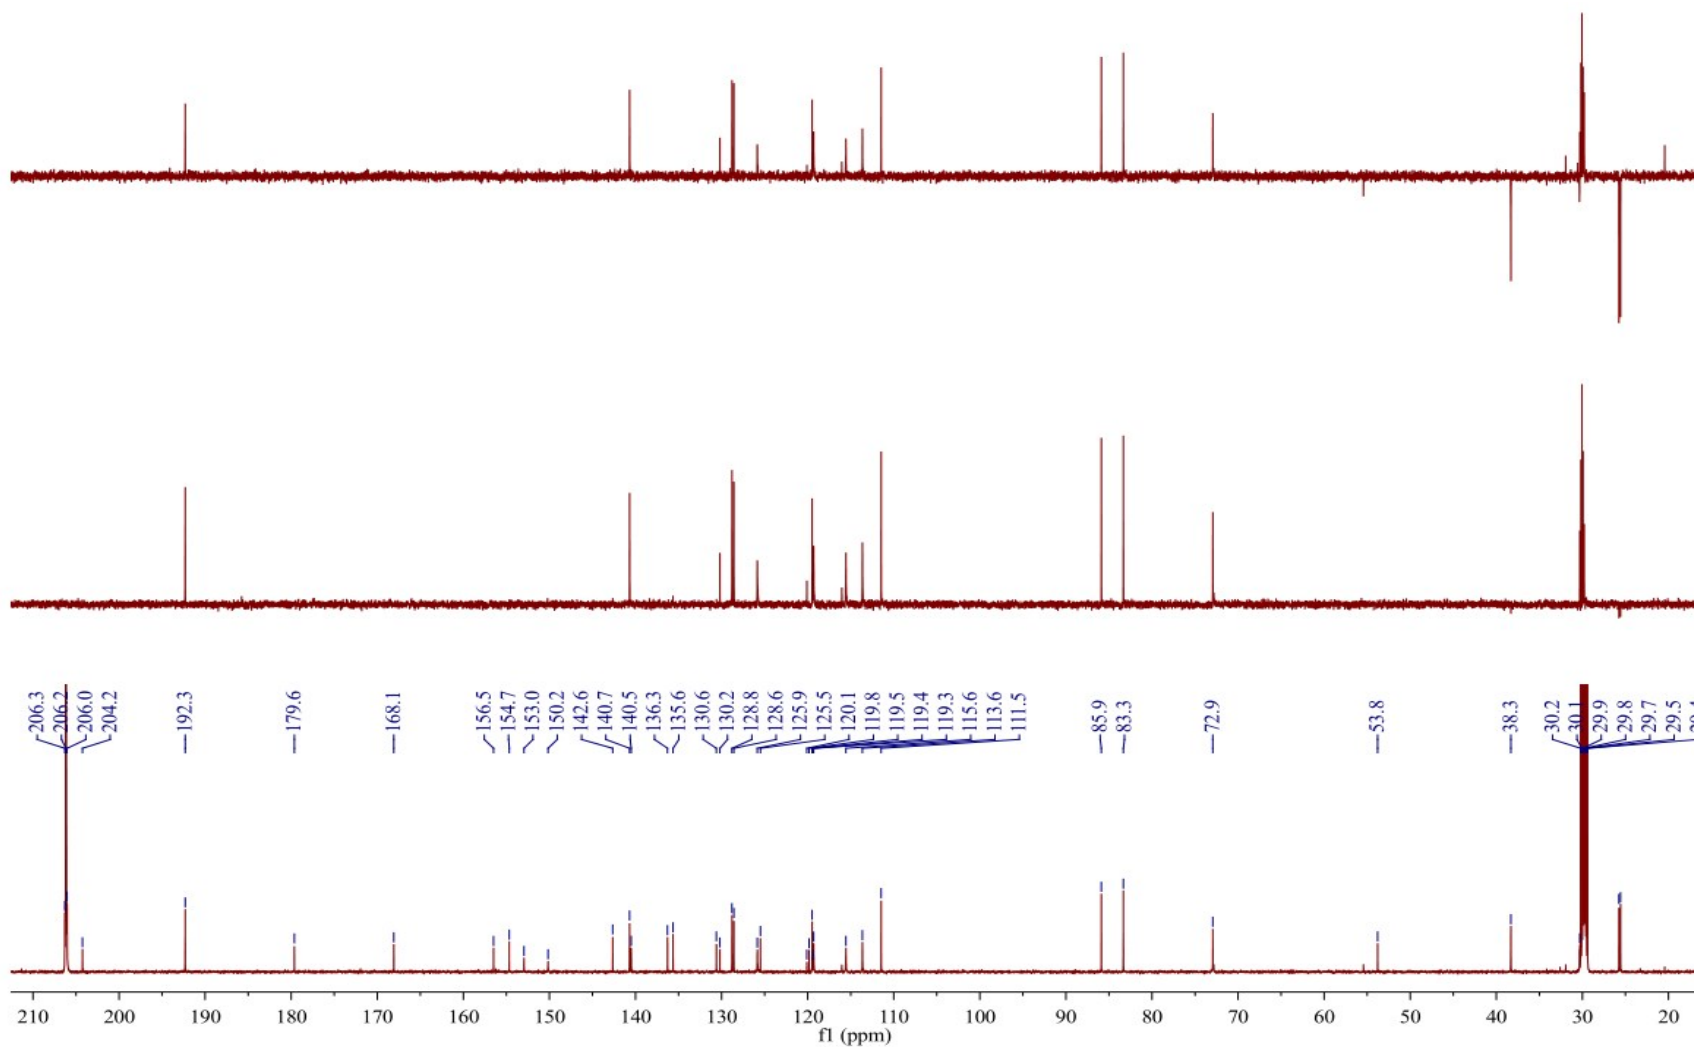

Figure S14. HSQC spectrum (100/150 MHz, CO(CD)<sub>3</sub>) of compound 2.

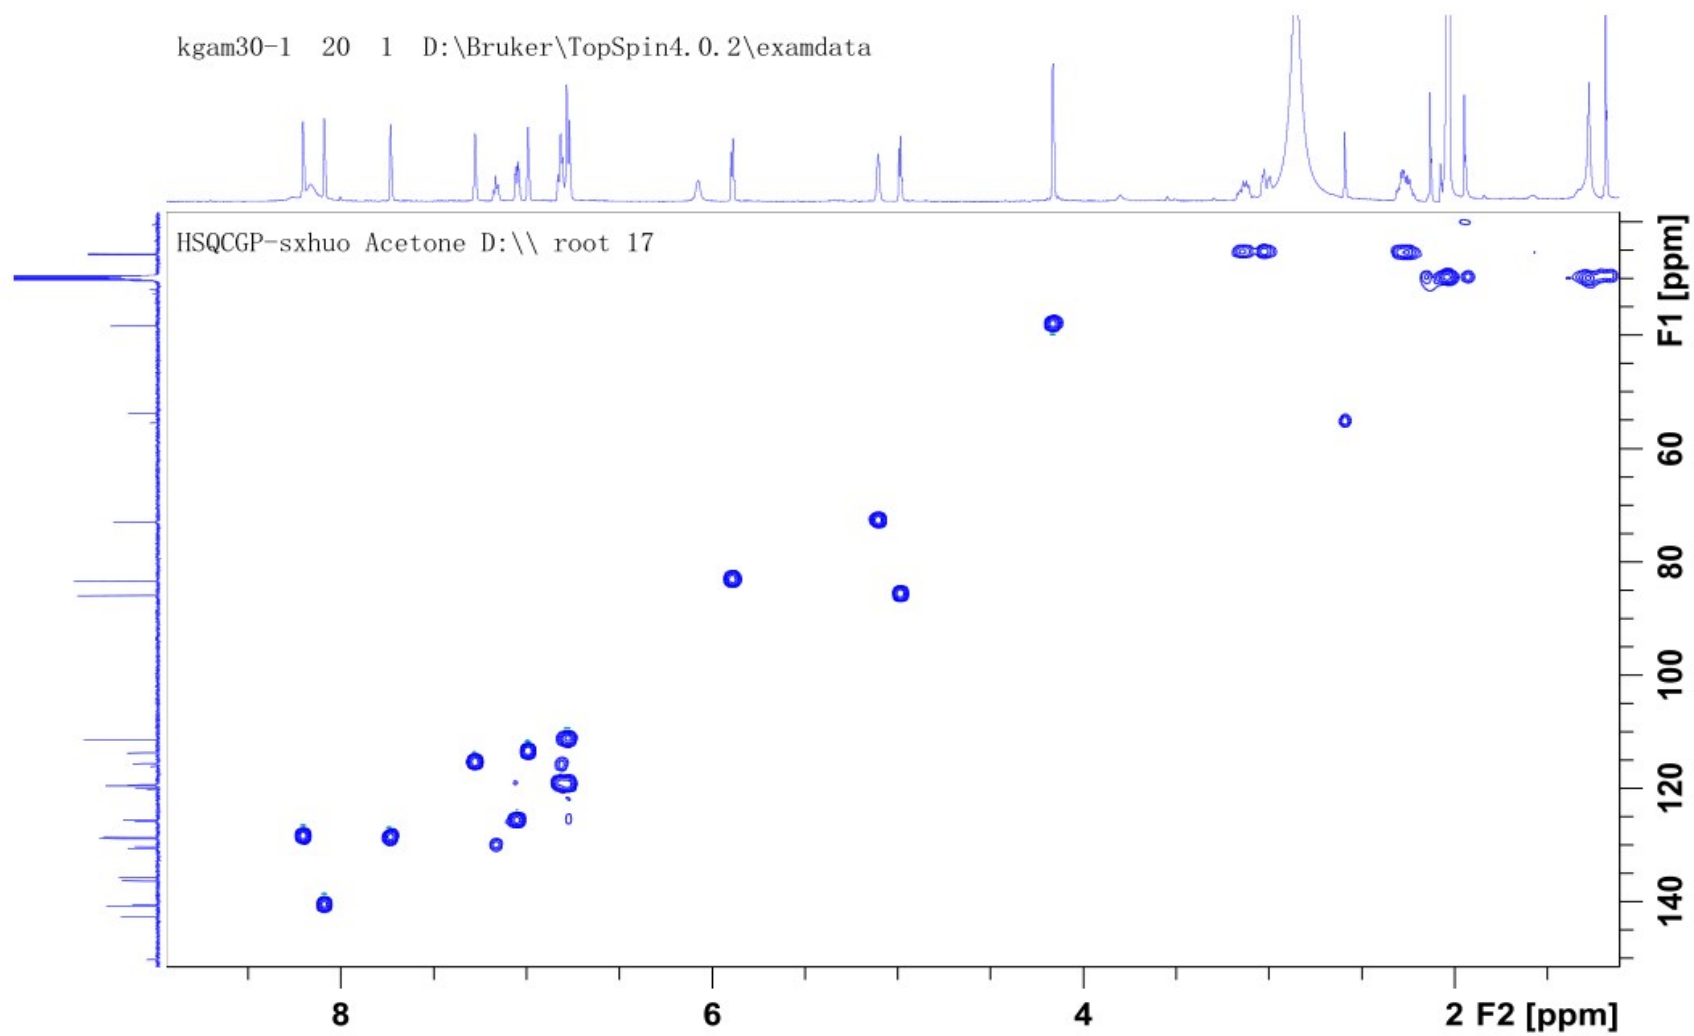

Figure S15. HMBC spectrum (600/150 MHz, CO(CD)<sub>3</sub>) of compound 2.

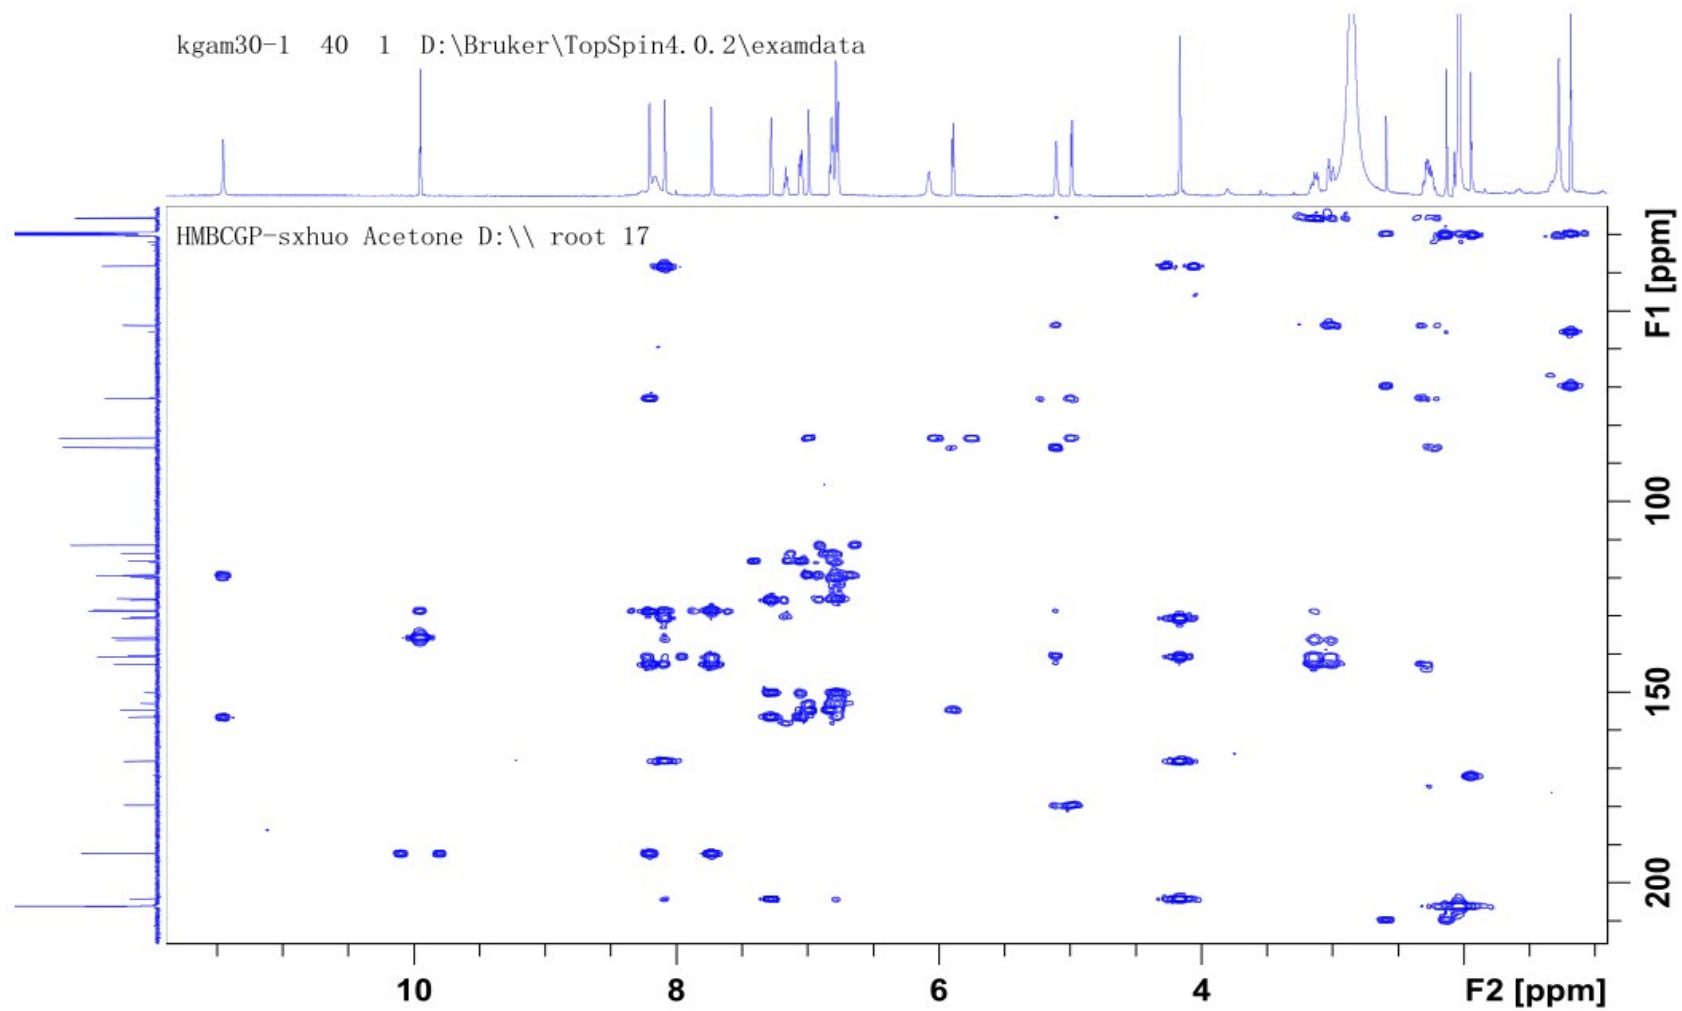



Figure S16.  $^1\text{H}$ - $^1\text{H}$  COSY spectrum (600 MHz,  $\text{CO}(\text{CD})_3$ ) of compound 2.

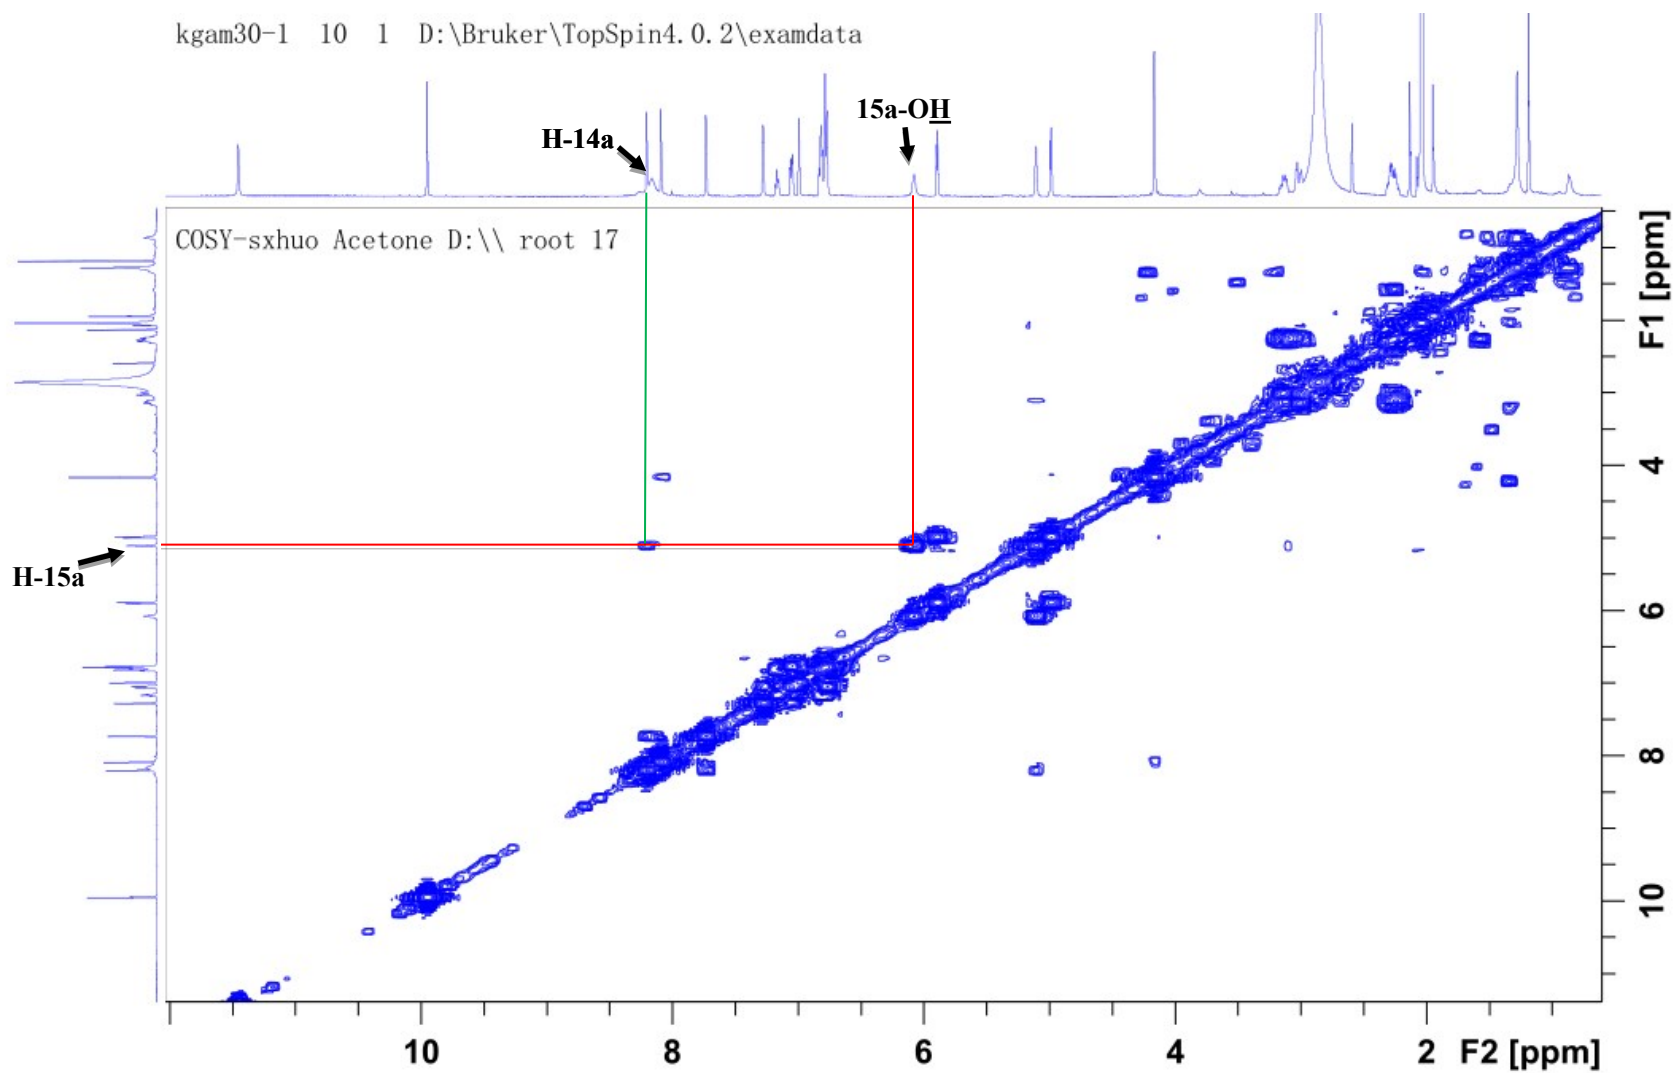

Figure S17. ROESY spectrum (600 MHz, CO(CD)<sub>3</sub>) of compound 2.

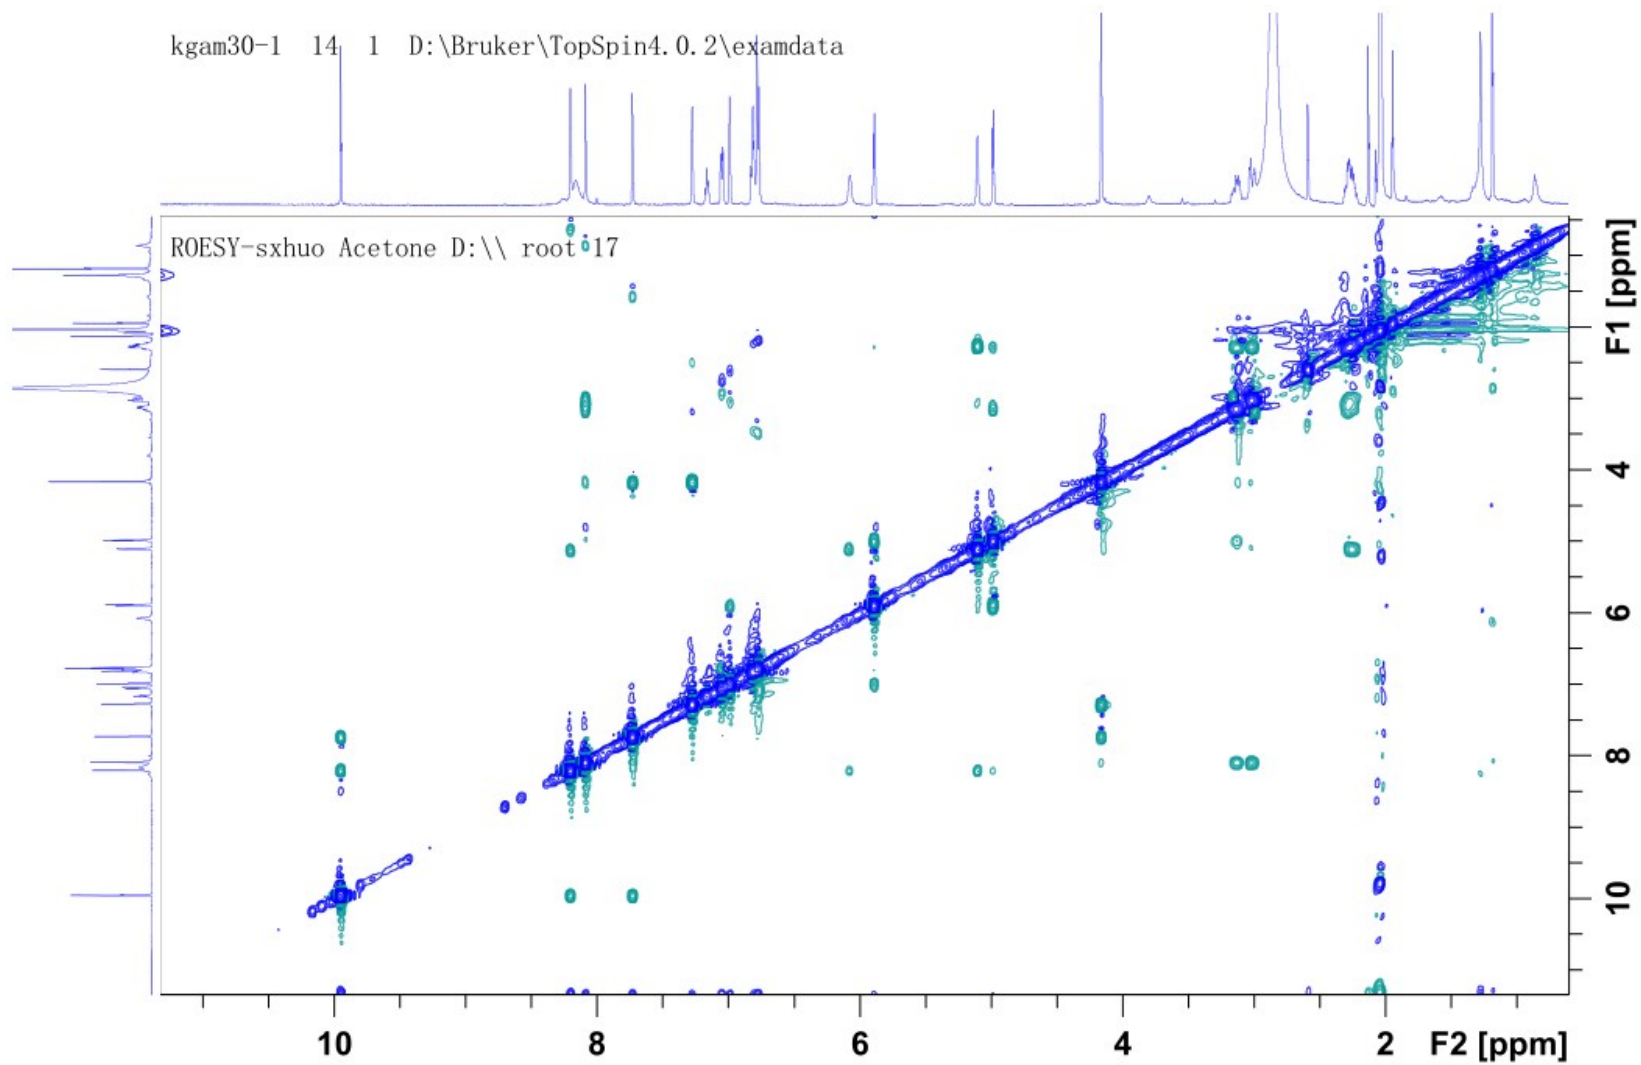

Figure S18. HSMQC spectrum (800 MHz, CO(CD)<sub>3</sub>) of compound 2.

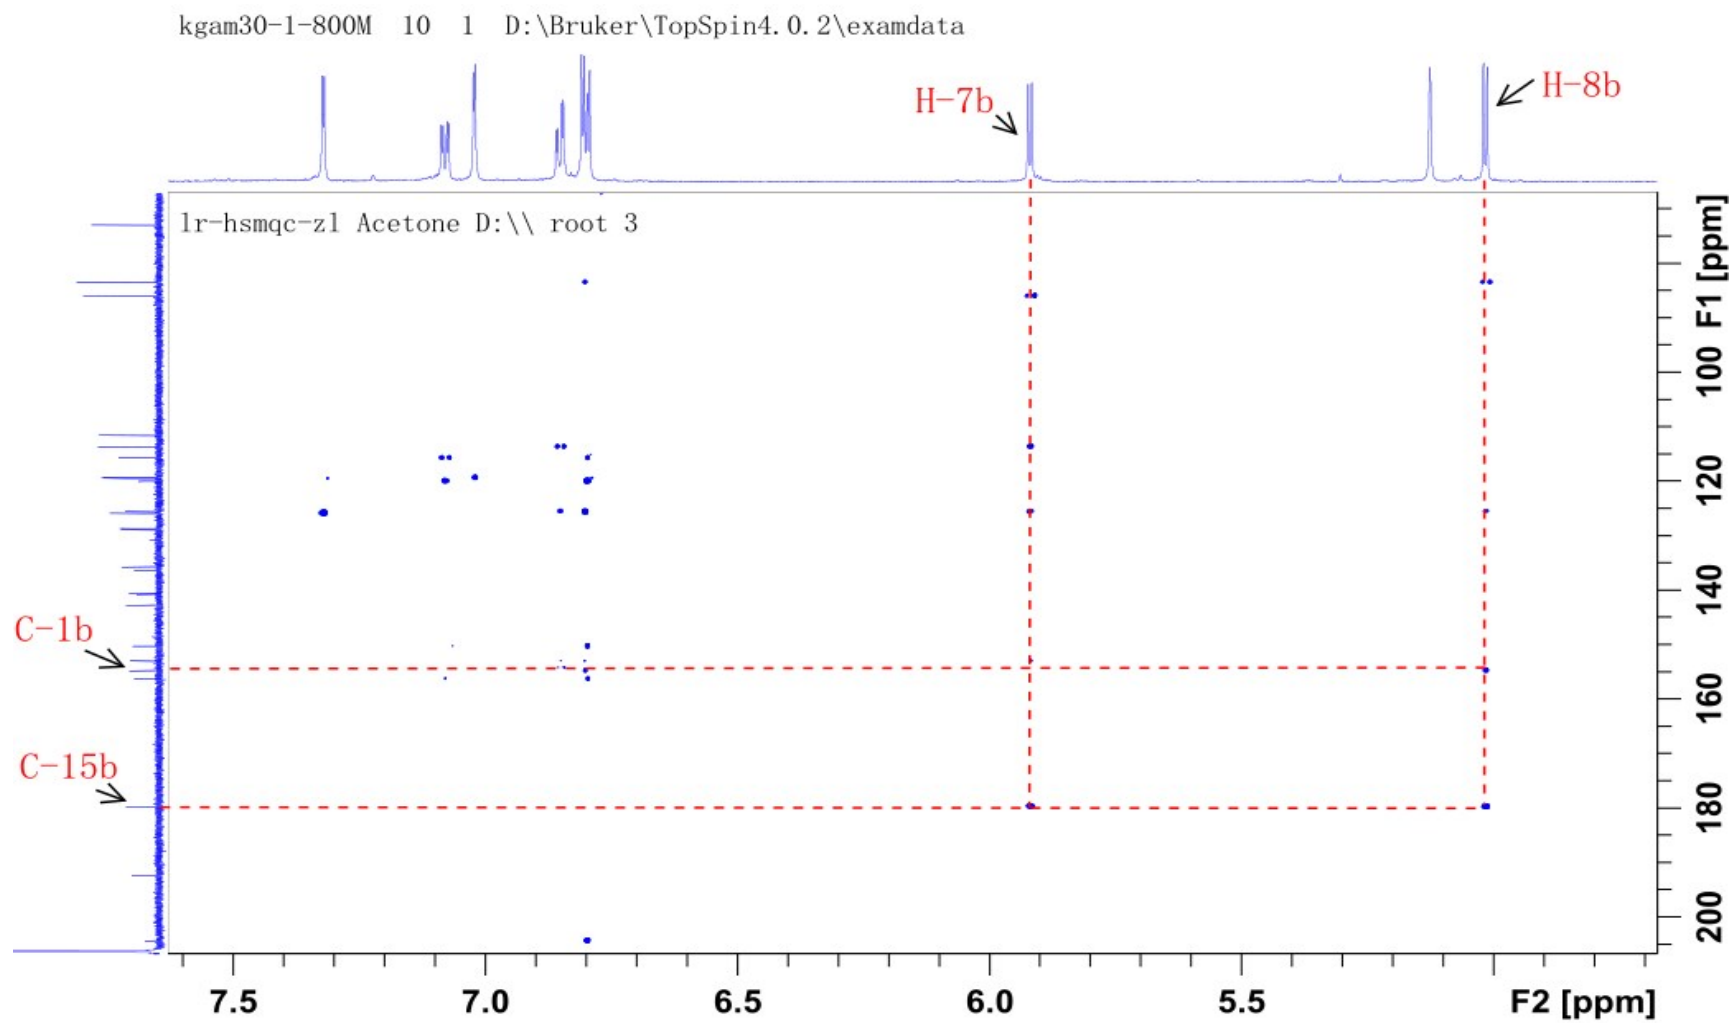

HRESIMS, CD spectra, as well as computational ECD data of 2

Figure S19. HRESIMS spectrum of applanmerotic acid B (2).

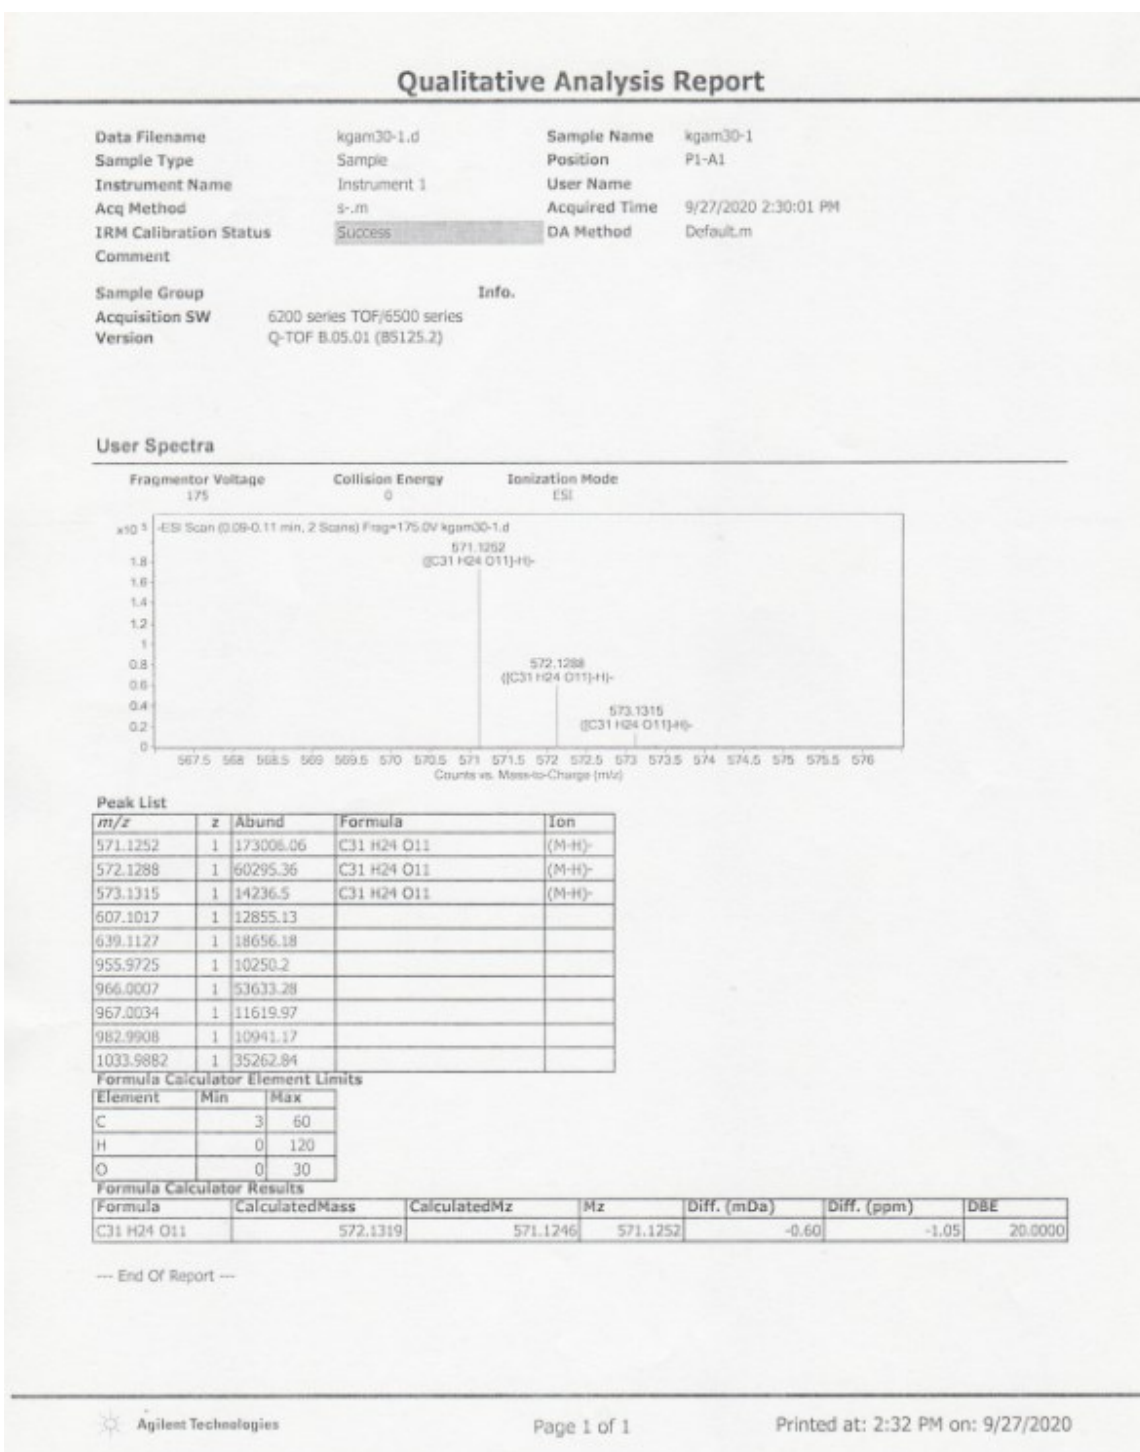

Figure S20. CD spectrum of applanmerotic acid B (2).

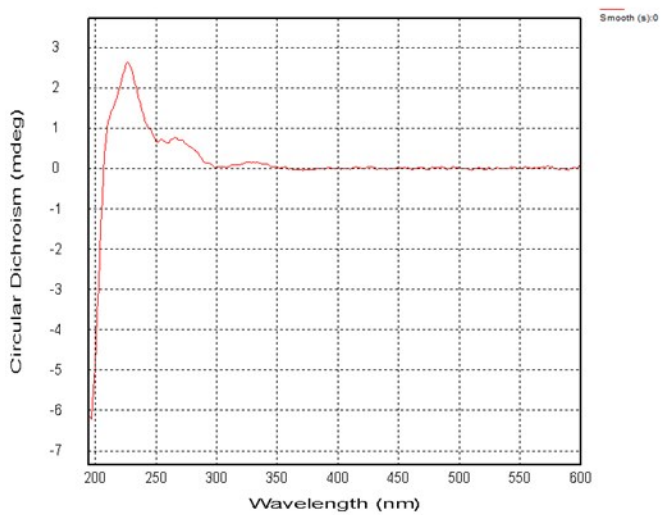

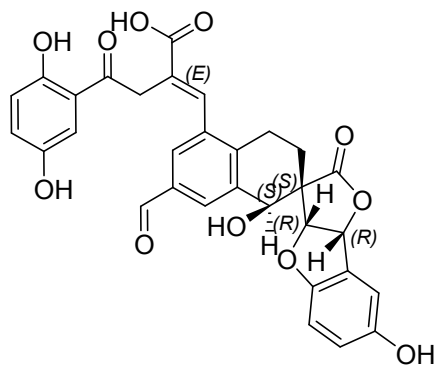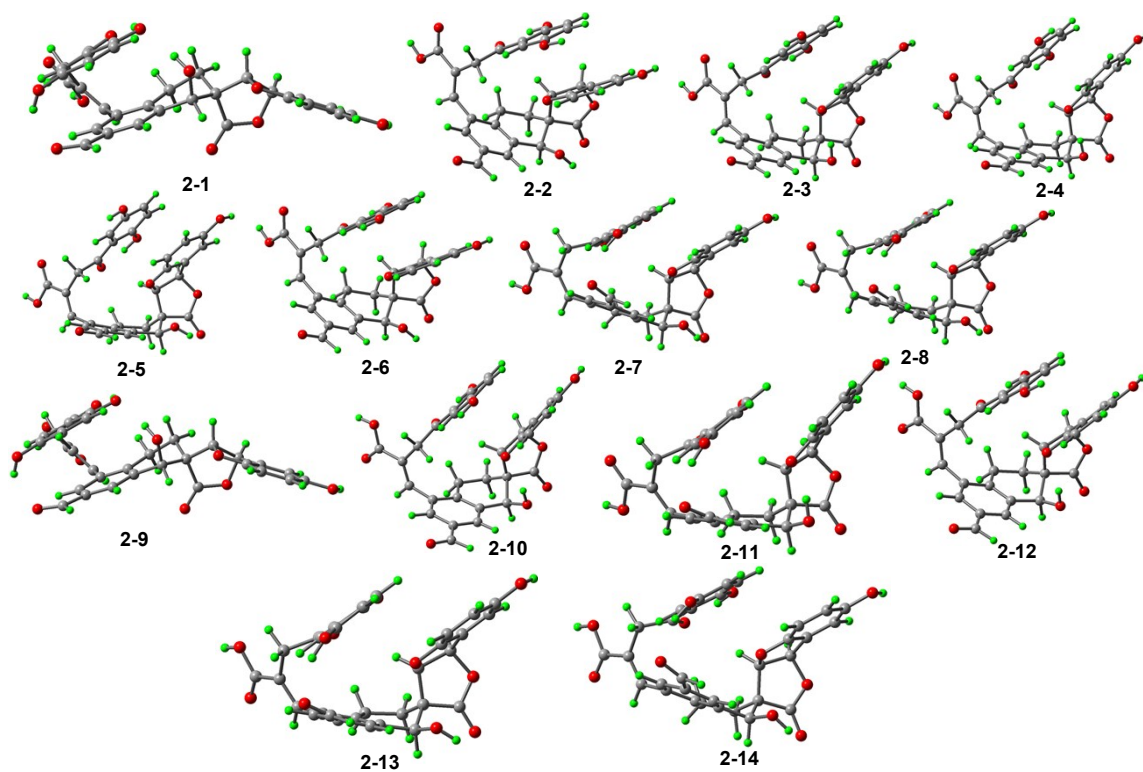

**Figure S21.** Fourteen optimized conformers of **2**.

**Table S17.** Conformational analysis of the 14 optimized conformers of **2** in the gas phase (T = 298.15 K)

| Conformer   | E (Hartree)  | C (Hartree) | G (kcal/mol) | $\Delta G$ (kcal/mol) | Population |
|-------------|--------------|-------------|--------------|-----------------------|------------|
| <b>2b-1</b> | -2023.111577 | 0.428064    | -1269252.918 | 0                     | 28.25%     |
| <b>2b-2</b> | -2023.108869 | 0.426017    | -1269252.503 | 0.414626836           | 14.02%     |
| <b>2b-3</b> | -2023.10953  | 0.427011    | -1269252.294 | 0.624051823           | 9.85%      |
| <b>2b-4</b> | -2023.109522 | 0.427025    | -1269252.28  | 0.637417773           | 9.63%      |
| <b>2b-5</b> | -2023.108054 | 0.426126    | -1269251.923 | 0.994727901           | 5.26%      |
| <b>2b-6</b> | -2023.108052 | 0.426137    | -1269251.915 | 1.002496467           | 5.20%      |
| <b>2b-7</b> | -2023.109773 | 0.427892    | -1269251.894 | 1.023825512           | 5.01%      |
| <b>2b-8</b> | -2023.109774 | 0.427893    | -1269251.894 | 1.023938464           | 5.01%      |
| <b>2b-9</b> | -2023.109696 | 0.428045    | -1269251.749 | 1.168253075           | 3.93%      |

|              |              |          |              |             |       |
|--------------|--------------|----------|--------------|-------------|-------|
| <b>2b-10</b> | -2023.108473 | 0.42691  | -1269251.694 | 1.223367226 | 3.58% |
| <b>2b-11</b> | -2023.111362 | 0.429818 | -1269251.682 | 1.235892314 | 3.50% |
| <b>2b-12</b> | -2023.108621 | 0.427412 | -1269251.472 | 1.445718907 | 2.46% |
| <b>2b-13</b> | -2023.108401 | 0.427924 | -1269251.013 | 1.905024412 | 1.13% |
| <b>2b-14</b> | -2023.1084   | 0.42793  | -1269251.008 | 1.909831134 | 1.12% |

Electronic energy obtained at M062X/6-311+G(2d,p) (Solvent=Methanol) level of theory; Thermal correction to Gibbs free energy obtained at B3LYP/6-31G(d), EmpiricalDispersion=GD3 level of theory; Gibbs free energy (E + C); The relative Gibbs free energy; The Boltzmann distribution of each conformer.

**Table S18.** Atomic coordinates (Å) of **2-1** obtained at the B3LYP/6-31G(d,p) level of theory in the gas phase.

|   |           |           |           |   |           |           |           |
|---|-----------|-----------|-----------|---|-----------|-----------|-----------|
| C | 2.235245  | -1.6632   | -1.822606 | H | 1.174673  | -3.509724 | -2.050217 |
| C | 3.360399  | -1.004427 | -1.262675 | H | 5.096442  | 0.647026  | 0.045194  |
| C | 4.276722  | -1.768799 | -0.512913 | H | 5.210031  | 1.667696  | -1.376335 |
| C | 4.075587  | -3.125019 | -0.29891  | H | 2.367625  | 3.21432   | 1.323676  |
| C | 2.96235   | -3.75961  | -0.870792 | H | 3.759905  | 0.155521  | 2.163447  |
| C | 2.053491  | -3.036097 | -1.626975 | H | 0.398109  | -2.43016  | 1.525391  |
| C | 3.46997   | 0.454808  | -1.40035  | H | 2.316683  | -3.304857 | 2.642291  |
| C | 4.510626  | 1.261954  | -0.638295 | H | -7.075657 | 2.03586   | -0.049604 |
| C | 3.884997  | 2.426835  | 0.10641   | H | -8.259848 | -2.084359 | 0.322863  |
| C | 2.788863  | 2.317383  | 0.878016  | H | -5.910047 | -2.835383 | -0.108513 |
| C | 2.096197  | 1.030573  | 1.112442  | H | -4.308557 | 2.183297  | -1.154142 |
| C | 2.756195  | 0.006896  | 1.780255  | H | -3.127048 | 0.194423  | -2.04811  |
| C | 2.148831  | -1.246828 | 1.934012  | H | -0.749381 | 0.934872  | -1.880824 |
| C | 0.864972  | -1.453265 | 1.428968  | H | -1.655698 | 2.337461  | -1.335888 |
| C | 2.896849  | -2.370843 | 2.510519  | H | 0.844562  | 2.408117  | -0.830916 |
| C | 4.541742  | 3.744258  | -0.099773 | H | -0.193501 | 2.703306  | 0.552565  |
| C | -5.202521 | -0.803412 | -0.317426 | H | -1.747915 | -1.349949 | 0.885413  |
| C | -5.524489 | 0.551282  | -0.303999 | O | 5.4936    | 3.921871  | -0.840787 |
| C | -6.825922 | 0.97834   | -0.064753 | H | 4.482584  | 5.557844  | 0.39573   |
| C | -7.808005 | 0.005263  | 0.15846   | O | 2.688679  | 1.081518  | -2.139701 |
| C | -7.473371 | -1.357568 | 0.147049  | O | 1.282062  | -0.992966 | -2.5217   |
| C | -6.164699 | -1.78139  | -0.094014 | O | -1.968741 | 1.37575   | 2.116506  |
| C | -4.252486 | 1.311966  | -0.501787 | O | -3.735772 | 1.763487  | 0.793952  |
| C | -3.269604 | 0.212451  | -0.966007 | O | -9.120225 | 0.321442  | 0.394913  |
| C | -1.988809 | 0.500187  | -0.187713 | O | -3.874214 | -1.045755 | -0.570116 |
| C | -1.08725  | 1.470068  | -0.986388 | O | -1.034388 | -1.602397 | -0.977192 |
| C | 0.116512  | 1.932942  | -0.165574 | H | -0.304531 | -1.264557 | -1.533978 |



|   |           |           |           |   |           |           |           |
|---|-----------|-----------|-----------|---|-----------|-----------|-----------|
| C | 0.794807  | 0.81738   | 0.591983  | H | 5.123359  | -3.371626 | 1.286134  |
| C | 0.181436  | -0.431006 | 0.763972  | H | 1.615081  | -0.053327 | -2.601172 |
| C | -1.175614 | -0.760676 | 0.165142  | O | 3.986875  | 4.746566  | 0.614575  |
| C | -2.517423 | 1.22753   | 1.048489  | O | 4.088433  | -2.334138 | 2.800379  |
| H | 5.143498  | -1.299921 | -0.063614 | O | 4.925769  | -3.876822 | 0.475076  |
| H | 2.812511  | -4.818812 | -0.689498 | H | -9.223111 | 1.28664   | 0.384266  |

**Table S19.** Atomic coordinates (Å) of **2-2** obtained at the B3LYP/6-31G(d,p) level of theory in the gas phase.

|   |           |           |           |   |           |           |           |
|---|-----------|-----------|-----------|---|-----------|-----------|-----------|
| C | 1.047714  | 2.622331  | -1.257237 | H | 3.116943  | 3.062154  | -1.594136 |
| C | 0.010235  | 2.51407   | -0.293862 | H | -2.016    | 1.213424  | 1.124674  |
| C | 0.305235  | 2.786509  | 1.05853   | H | -2.629226 | 2.829874  | 0.78989   |
| C | 1.583999  | 3.147247  | 1.449719  | H | -4.86971  | -0.400389 | -0.680805 |
| C | 2.599158  | 3.262486  | 0.485046  | H | -3.921396 | -0.615896 | 2.449216  |
| C | 2.332624  | 2.999426  | -0.847894 | H | -0.538094 | -3.259979 | 2.370656  |
| C | -1.318778 | 2.059176  | -0.709669 | H | -1.580915 | -2.818574 | 4.460322  |
| C | -2.409717 | 1.857767  | 0.334961  | H | 5.035447  | -0.035614 | -1.225595 |
| C | -3.661154 | 1.263171  | -0.256634 | H | 4.334192  | 0.652634  | 2.963766  |
| C | -3.967257 | -0.043514 | -0.19073  | H | 1.905428  | 0.106107  | 2.678     |
| C | -3.097798 | -1.029636 | 0.500804  | H | 2.290908  | 0.006727  | -2.563079 |
| C | -3.178951 | -1.168006 | 1.882381  | H | 0.107491  | -0.097797 | -1.604865 |
| C | -2.281428 | -2.003395 | 2.561436  | H | -0.657423 | -1.755122 | -3.363976 |
| C | -1.278066 | -2.662298 | 1.849208  | H | -1.10184  | -3.319561 | -2.694902 |
| C | -2.355511 | -2.154279 | 4.024362  | H | -2.114742 | -0.547358 | -1.992079 |
| C | -4.526987 | 2.2225    | -0.987628 | H | -3.012243 | -2.029879 | -2.160298 |
| C | 2.145574  | -0.2746   | 0.566812  | H | -0.341552 | -4.120776 | -0.702521 |
| C | 3.010434  | -0.32013  | -0.522383 | O | -4.301118 | 3.418576  | -1.053122 |
| C | 4.358613  | -0.010452 | -0.375696 | H | -6.092533 | 2.373681  | -2.019078 |
| C | 4.820448  | 0.344054  | 0.897016  | O | -1.562228 | 1.79562   | -1.902229 |
| C | 3.941804  | 0.37291   | 1.991369  | O | 0.861878  | 2.342036  | -2.568369 |
| C | 2.590513  | 0.062363  | 1.839185  | O | 1.67862   | -4.040399 | -2.522009 |
| C | 2.214472  | -0.69746  | -1.733822 | O | 2.578838  | -2.005235 | -2.266881 |
| C | 0.778098  | -0.831404 | -1.164759 | O | 6.128539  | 0.675648  | 1.141736  |
| C | 0.342256  | -2.270956 | -1.49617  | O | 0.843001  | -0.54822  | 0.248287  |
| C | -0.880803 | -2.281109 | -2.430096 | O | 1.065744  | -3.364208 | 0.598409  |
| C | -2.08725  | -1.612563 | -1.741999 | H | 1.545738  | -4.142873 | 0.276386  |

|   |           |           |           |   |           |           |           |
|---|-----------|-----------|-----------|---|-----------|-----------|-----------|
| C | -2.127471 | -1.751453 | -0.232834 | H | 2.756194  | 3.527346  | 2.922674  |
| C | -1.188471 | -2.528731 | 0.464902  | H | -0.09822  | 2.111011  | -2.667119 |
| C | -0.031838 | -3.155037 | -0.28155  | O | -5.599762 | 1.655082  | -1.580138 |
| C | 1.567652  | -2.891078 | -2.155122 | O | -3.183563 | -1.611543 | 4.740134  |
| H | -0.45993  | 2.696136  | 1.81991   | O | 1.810031  | 3.363259  | 2.782241  |
| H | 3.606473  | 3.532495  | 0.789446  | H | 6.631064  | 0.619844  | 0.313156  |

**Table S20.** Atomic coordinates (Å) of **2-3** obtained at the B3LYP/6-31G(d,p) level of theory in the gas phase.

|   |           |           |           |   |           |           |           |
|---|-----------|-----------|-----------|---|-----------|-----------|-----------|
| C | -1.312731 | -2.487626 | -1.028187 | H | -3.417648 | -2.869455 | -1.154649 |
| C | -0.173009 | -2.450802 | -0.183738 | H | 2.121596  | -1.382569 | 1.02355   |
| C | -0.32744  | -2.769617 | 1.186531  | H | 2.537649  | -3.026079 | 0.548578  |
| C | -1.565746 | -3.114514 | 1.698621  | H | 4.844768  | 0.076274  | -1.092722 |
| C | -2.683173 | -3.165479 | 0.844292  | H | 4.303068  | 0.296354  | 2.126248  |
| C | -2.55706  | -2.855818 | -0.495876 | H | 1.179536  | 3.220289  | 2.487157  |
| C | 1.126369  | -2.073964 | -0.740401 | H | 2.429884  | 2.655513  | 4.428354  |
| C | 2.35186   | -2.017399 | 0.164098  | H | -5.01032  | 0.105209  | -1.539886 |
| C | 3.568278  | -1.503016 | -0.560327 | H | -4.84655  | -0.659003 | 2.692558  |
| C | 3.980604  | -0.225782 | -0.506224 | H | -2.440953 | 0.036354  | 2.758212  |
| C | 3.278465  | 0.805692  | 0.29972   | H | -2.193479 | 0.37626   | -2.537606 |
| C | 3.542714  | 0.91479   | 1.660629  | H | -0.190112 | 0.219941  | -1.211815 |
| C | 2.810585  | 1.810622  | 2.45167   | H | 0.46592   | 1.840424  | -3.230073 |
| C | 1.788025  | 2.563817  | 1.873169  | H | 1.142803  | 3.330523  | -2.589891 |
| C | 3.080775  | 1.932527  | 3.894867  | H | 1.940425  | 0.452968  | -2.055479 |
| C | 4.261145  | -2.502258 | -1.412578 | H | 2.954838  | 1.842761  | -2.318716 |
| C | -2.418444 | 0.463447  | 0.640691  | H | 0.637924  | 4.181885  | -0.471489 |
| C | -3.123055 | 0.486393  | -0.557035 | O | 3.924849  | -3.671488 | -1.487693 |
| C | -4.45697  | 0.095455  | -0.604761 | H | 5.682349  | -2.741812 | -2.621047 |
| C | -5.065496 | -0.318165 | 0.586373  | O | 1.244674  | -1.769337 | -1.94302  |
| C | -4.34383  | -0.327193 | 1.790176  | O | -1.262727 | -2.15988  | -2.338659 |
| C | -3.005038 | 0.06299   | 1.832824  | O | -1.495176 | 4.344909  | -2.140915 |
| C | -2.204615 | 0.980592  | -1.630414 | O | -2.515734 | 2.35117   | -2.025193 |
| C | -0.837549 | 1.039679  | -0.911968 | O | -6.369405 | -0.731299 | 0.644167  |
| C | -0.265725 | 2.42051   | -1.255967 | O | -1.104845 | 0.867653  | 0.510777  |
| C | 0.847826  | 2.31218   | -2.318878 | O | -0.650948 | 3.528378  | 0.914069  |
| C | 2.050645  | 1.509484  | -1.793337 | H | -0.955741 | 2.668424  | 1.258277  |

|   |           |           |           |   |           |           |           |
|---|-----------|-----------|-----------|---|-----------|-----------|-----------|
| C | 2.286539  | 1.616153  | -0.301823 | H | -0.94545  | -3.350688 | 3.502747  |
| C | 1.513404  | 2.463569  | 0.508911  | H | -0.30965  | -1.964907 | -2.538381 |
| C | 0.321892  | 3.213871  | -0.067809 | O | 5.306979  | -2.003328 | -2.105623 |
| C | -1.457657 | 3.175159  | -1.839047 | O | 3.940351  | 1.307326  | 4.496562  |
| H | 0.532752  | -2.739707 | 1.846811  | O | -1.783237 | -3.413275 | 3.016049  |
| H | -3.648224 | -3.432084 | 1.261154  | H | -6.763161 | -0.675309 | -0.241283 |

**Table S21.** Atomic coordinates (Å) of **2-4** obtained at the B3LYP/6-31G(d,p) level of theory in the gas phase.

|   |           |           |           |   |           |           |           |
|---|-----------|-----------|-----------|---|-----------|-----------|-----------|
| C | -1.28874  | -2.540472 | -1.007121 | H | -3.389989 | -2.925697 | -1.165121 |
| C | -0.171701 | -2.452401 | -0.133865 | H | 2.093396  | -1.331261 | 1.074873  |
| C | -0.366225 | -2.669644 | 1.247749  | H | 2.523651  | -2.995004 | 0.694488  |
| C | -1.621679 | -2.967014 | 1.750324  | H | 4.872251  | 0.027214  | -1.031738 |
| C | -2.71266  | -3.081662 | 0.870655  | H | 4.29589   | 0.398212  | 2.151558  |
| C | -2.546785 | -2.868076 | -0.486421 | H | 1.160265  | 3.324016  | 2.356259  |
| C | 1.145433  | -2.11493  | -0.67717  | H | 2.400378  | 2.855699  | 4.329012  |
| C | 2.346263  | -2.007531 | 0.254653  | H | -5.012532 | 0.032561  | -1.506778 |
| C | 3.578769  | -1.52601  | -0.464951 | H | -4.830752 | -0.530909 | 2.756339  |
| C | 3.993718  | -0.248555 | -0.453731 | H | -2.420367 | 0.15198   | 2.776397  |
| C | 3.280119  | 0.816363  | 0.297274  | H | -2.195132 | 0.234601  | -2.527863 |
| C | 3.536033  | 0.990983  | 1.652919  | H | -0.184575 | 0.146795  | -1.208891 |
| C | 2.796008  | 1.920131  | 2.396649  | H | 0.483155  | 1.671229  | -3.292707 |
| C | 1.774379  | 2.641416  | 1.777335  | H | 1.149878  | 3.193337  | -2.721262 |
| C | 3.05747   | 2.111268  | 3.833962  | H | 1.959975  | 0.349275  | -2.049401 |
| C | 4.288462  | -2.561339 | -1.25837  | H | 2.967401  | 1.731561  | -2.368611 |
| C | -2.407638 | 0.480572  | 0.641318  | H | 0.634176  | 4.142262  | -0.649414 |
| C | -3.11816  | 0.450323  | -0.552647 | O | 3.959045  | -3.734643 | -1.282273 |
| C | -4.454426 | 0.065237  | -0.575015 | H | 5.729484  | -2.850916 | -2.431974 |
| C | -5.058675 | -0.288938 | 0.637214  | O | 1.297005  | -1.884015 | -1.891751 |
| C | -4.330951 | -0.244972 | 1.836713  | O | -1.201378 | -2.295308 | -2.334275 |
| C | -2.989942 | 0.139865  | 1.854096  | O | -1.49017  | 4.218372  | -2.336542 |
| C | -2.20196  | 0.885748  | -1.653373 | O | -2.511445 | 2.233887  | -2.118452 |
| C | -0.831713 | 0.9786    | -0.943422 | O | -6.363836 | -0.693618 | 0.720575  |
| C | -0.261512 | 2.342647  | -1.352224 | O | -1.092803 | 0.871199  | 0.486312  |
| C | 0.857906  | 2.187859  | -2.403145 | O | -0.660691 | 3.554274  | 0.759171  |
| C | 2.061904  | 1.417036  | -1.833936 | H | -0.960299 | 2.712388  | 1.149069  |

|   |           |           |           |   |           |           |           |
|---|-----------|-----------|-----------|---|-----------|-----------|-----------|
| C | 2.288547  | 1.59336   | -0.347544 | H | -2.68321  | -3.291915 | 3.317673  |
| C | 1.508214  | 2.475743  | 0.417818  | H | -0.243503 | -2.11162  | -2.518901 |
| C | 0.318262  | 3.194223  | -0.200765 | O | 5.342339  | -2.090487 | -1.958985 |
| C | -1.452913 | 3.065817  | -1.9747   | O | 3.916479  | 1.519445  | 4.469205  |
| H | 0.462964  | -2.595356 | 1.940803  | O | -1.750366 | -3.131766 | 3.10298   |
| H | -3.699337 | -3.31297  | 1.261595  | H | -6.761428 | -0.678082 | -0.164785 |

**Table S22.** Atomic coordinates (Å) of **2-5** obtained at the B3LYP/6-31G(d,p) level of theory in the gas phase.

|   |           |           |           |   |           |           |           |
|---|-----------|-----------|-----------|---|-----------|-----------|-----------|
| C | 1.071301  | 2.548247  | -1.309539 | H | 3.144196  | 2.999252  | -1.61378  |
| C | 0.003897  | 2.49631   | -0.377559 | H | -2.067609 | 1.296038  | 1.067105  |
| C | 0.247363  | 2.886816  | 0.959728  | H | -2.669915 | 2.878226  | 0.582184  |
| C | 1.504081  | 3.306624  | 1.359366  | H | -4.841429 | -0.470833 | -0.725736 |
| C | 2.552091  | 3.358685  | 0.422465  | H | -3.920221 | -0.447152 | 2.446233  |
| C | 2.337234  | 2.982524  | -0.889672 | H | -0.53722  | -3.090713 | 2.570114  |
| C | -1.304125 | 1.99556   | -0.802371 | H | -1.581482 | -2.492325 | 4.620026  |
| C | -2.43283  | 1.873846  | 0.214665  | H | 5.03146   | -0.113635 | -1.289648 |
| C | -3.662513 | 1.229936  | -0.371058 | H | 4.368019  | 0.863412  | 2.84773   |
| C | -3.957887 | -0.073623 | -0.232277 | H | 1.940814  | 0.282553  | 2.627869  |
| C | -3.094018 | -1.006067 | 0.535586  | H | 2.276862  | -0.189232 | -2.598931 |
| C | -3.176949 | -1.040222 | 1.923558  | H | 0.103927  | -0.228456 | -1.610162 |
| C | -2.280264 | -1.822428 | 2.664395  | H | -0.646703 | -2.013879 | -3.259882 |
| C | -1.276523 | -2.533592 | 2.004661  | H | -1.092809 | -3.52389  | -2.477293 |
| C | -2.354593 | -1.861483 | 4.134592  | H | -2.102275 | -0.705149 | -1.979201 |
| C | -4.512965 | 2.130543  | -1.18968  | H | -3.003808 | -2.194142 | -2.046498 |
| C | 2.161212  | -0.24233  | 0.545588  | H | -0.338773 | -4.177573 | -0.433997 |
| C | 3.015423  | -0.358433 | -0.546846 | O | -4.283886 | 3.318043  | -1.342599 |
| C | 4.363209  | -0.032178 | -0.436537 | H | -6.055676 | 2.201174  | -2.263378 |
| C | 4.836022  | 0.411323  | 0.803699  | O | -1.503031 | 1.634486  | -1.978148 |
| C | 3.967994  | 0.512633  | 1.901968  | O | 0.934627  | 2.167985  | -2.600718 |
| C | 2.617022  | 0.186028  | 1.786143  | O | 1.690823  | -4.226106 | -2.247453 |
| C | 2.211469  | -0.829848 | -1.718976 | O | 2.580533  | -2.172362 | -2.154684 |
| C | 0.781158  | -0.928993 | -1.128625 | O | 6.145183  | 0.76339   | 1.011486  |
| C | 0.348925  | -2.389516 | -1.356034 | O | 0.857929  | -0.549051 | 0.261714  |
| C | -0.872031 | -2.468661 | -2.28993  | O | 1.066553  | -3.332705 | 0.813171  |
| C | -2.079044 | -1.750599 | -1.655572 | H | 1.54813   | -4.131055 | 0.546423  |



|   |           |           |           |   |           |          |           |
|---|-----------|-----------|-----------|---|-----------|----------|-----------|
| C | -2.123056 | -1.781178 | -0.140609 | H | 1.015039  | 3.573534 | 3.198957  |
| C | -1.18538  | -2.504603 | 0.614288  | H | -0.018892 | 1.915514 | -2.713686 |
| C | -0.028009 | -3.184766 | -0.08245  | O | -5.574441 | 1.51915  | -1.758278 |
| C | 1.57546   | -3.052435 | -1.969363 | O | -3.181013 | -1.26352 | 4.807001  |
| H | -0.556053 | 2.84637   | 1.687495  | O | 1.805175  | 3.671535 | 2.643364  |
| H | 3.534793  | 3.676724  | 0.753443  | H | 6.639962  | 0.649744 | 0.184149  |

**Table S23.** Atomic coordinates (Å) of **2-6** obtained at the B3LYP/6-31G(d,p) level of theory in the gas phase.

|   |           |           |           |   |           |           |           |
|---|-----------|-----------|-----------|---|-----------|-----------|-----------|
| C | 1.072199  | 2.549107  | -1.309385 | H | 3.14515   | 2.999504  | -1.613988 |
| C | 0.00506   | 2.497052  | -0.377111 | H | -2.065528 | 1.294765  | 1.067275  |
| C | 0.249015  | 2.886863  | 0.960289  | H | -2.668118 | 2.877635  | 0.584754  |
| C | 1.505993  | 3.306048  | 1.359792  | H | -4.841925 | -0.468893 | -0.724604 |
| C | 2.553766  | 3.358133  | 0.422629  | H | -3.920359 | -0.44884  | 2.446946  |
| C | 2.338396  | 2.982695  | -0.88964  | H | -0.537497 | -3.092731 | 2.568088  |
| C | -1.303145 | 1.996697  | -0.801737 | H | -1.581571 | -2.496274 | 4.618643  |
| C | -2.43126  | 1.873719  | 0.21585   | H | 5.031772  | -0.115644 | -1.287162 |
| C | -3.661424 | 1.230737  | -0.369941 | H | 4.365239  | 0.860469  | 2.849948  |
| C | -3.957829 | -0.072613 | -0.231395 | H | 1.937757  | 0.281554  | 2.627585  |
| C | -3.094313 | -1.006003 | 0.53577   | H | 2.278012  | -0.188101 | -2.598842 |
| C | -3.177212 | -1.041551 | 1.923684  | H | 0.104074  | -0.227373 | -1.612459 |
| C | -2.280537 | -1.824567 | 2.663697  | H | -0.648583 | -2.013032 | -3.261422 |
| C | -1.276822 | -2.535053 | 2.003197  | H | -1.094715 | -3.522614 | -2.478042 |
| C | -2.354858 | -1.865133 | 4.133855  | H | -2.10191  | -0.702974 | -1.978973 |
| C | -4.511799 | 2.132437  | -1.187465 | H | -3.004878 | -2.191013 | -2.047405 |
| C | 2.159701  | -0.242591 | 0.545301  | H | -0.338437 | -4.176972 | -0.436127 |
| C | 3.014854  | -0.359169 | -0.546343 | O | -4.283668 | 3.320484  | -1.337439 |
| C | 4.362774  | -0.033923 | -0.434657 | H | -6.053775 | 2.204138  | -2.262182 |
| C | 4.83476   | 0.408862  | 0.806157  | O | -1.50267  | 1.636784  | -1.977784 |
| C | 3.965801  | 0.510418  | 1.903666  | O | 0.935004  | 2.169444  | -2.600685 |
| C | 2.614683  | 0.184893  | 1.786448  | O | 1.689171  | -4.224794 | -2.25133  |
| C | 2.211564  | -0.829374 | -1.71944  | O | 2.580093  | -2.171701 | -2.155905 |
| C | 0.780713  | -0.92804  | -1.13029  | O | 6.143972  | 0.760006  | 1.015228  |
| C | 0.348139  | -2.388453 | -1.358035 | O | 0.856407  | -0.548021 | 0.260043  |
| C | -0.873418 | -2.467389 | -2.291172 | O | 1.066839  | -3.331639 | 0.810782  |
| C | -2.079622 | -1.74872  | -1.656208 | H | 1.547579  | -4.130833 | 0.545077  |

|   |           |           |           |   |           |           |           |
|---|-----------|-----------|-----------|---|-----------|-----------|-----------|
| C | -2.123468 | -1.780575 | -0.141276 | H | 1.017625  | 3.571896  | 3.199696  |
| C | -1.185695 | -2.504675 | 0.612858  | H | -0.018718 | 1.917724  | -2.713582 |
| C | -0.028146 | -3.184081 | -0.08445  | O | -5.572071 | 1.521317  | -1.758603 |
| C | 1.574383  | -3.051415 | -1.971889 | O | -3.181419 | -1.268055 | 4.806868  |
| H | -0.554271 | 2.846422  | 1.688208  | O | 1.807517  | 3.67036   | 2.643846  |
| H | 3.536677  | 3.675668  | 0.753486  | H | 6.639476  | 0.646034  | 0.188371  |

**Table S24.** Atomic coordinates (Å) of **2-7** obtained at the B3LYP/6-31G(d,p) level of theory in the gas phase.

|   |           |           |           |   |           |           |           |
|---|-----------|-----------|-----------|---|-----------|-----------|-----------|
| C | 0.054128  | 1.931362  | -1.68359  | H | 1.856227  | 3.083838  | -1.787014 |
| C | -1.230248 | 1.808526  | -1.088924 | H | -3.865088 | 1.530288  | -0.482951 |
| C | -1.603196 | 2.729332  | -0.084028 | H | -4.095439 | 1.115376  | -2.162735 |
| C | -0.735959 | 3.725919  | 0.336247  | H | -4.152806 | -2.313806 | 0.287285  |
| C | 0.506308  | 3.870233  | -0.306328 | H | -3.640156 | 0.835729  | 1.778655  |
| C | 0.88819   | 2.993341  | -1.308164 | H | 0.309393  | 0.163275  | 3.33759   |
| C | -2.125041 | 0.739004  | -1.537562 | H | -0.864168 | 2.153876  | 3.979196  |
| C | -3.617045 | 0.782553  | -1.234572 | H | 5.372327  | -0.729872 | -2.111372 |
| C | -4.189947 | -0.568159 | -0.87023  | H | 5.087639  | 2.886709  | 0.202611  |
| C | -3.728196 | -1.32443  | 0.141046  | H | 2.795125  | 2.242538  | 0.983929  |
| C | -2.628863 | -0.916858 | 1.039915  | H | 2.60697   | -1.971253 | -2.26379  |
| C | -2.738474 | 0.234298  | 1.811607  | H | 0.563811  | -1.232594 | -1.166396 |
| C | -1.675632 | 0.641743  | 2.629709  | H | 0.309109  | -3.842011 | -0.964757 |
| C | -0.523403 | -0.144467 | 2.715196  | H | 0.145729  | -4.354316 | 0.707762  |
| C | -1.699019 | 1.953021  | 3.281367  | H | -1.533882 | -2.419612 | -0.896395 |
| C | -5.283303 | -1.063819 | -1.746188 | H | -2.03429  | -3.592135 | 0.294236  |
| C | 2.826488  | 0.402189  | -0.143751 | H | 0.689952  | -3.049643 | 2.493423  |
| C | 3.540713  | -0.42805  | -1.001479 | O | -5.697735 | -0.464133 | -2.72385  |
| C | 4.812744  | -0.079004 | -1.444799 | H | -6.484395 | -2.486861 | -2.010727 |
| C | 5.356864  | 1.131816  | -1.001167 | O | -1.704573 | -0.191141 | -2.252965 |
| C | 4.633791  | 1.957142  | -0.125614 | O | 0.513097  | 1.069522  | -2.616312 |
| C | 3.358066  | 1.602513  | 0.315144  | O | 2.923093  | -4.090258 | 1.261979  |
| C | 2.731318  | -1.666632 | -1.224538 | O | 3.334491  | -2.804161 | -0.527757 |
| C | 1.404163  | -1.346036 | -0.483513 | O | 6.60004   | 1.567014  | -1.382597 |
| C | 1.219971  | -2.510267 | 0.505905  | O | 1.583218  | -0.070918 | 0.171478  |
| C | 0.110486  | -3.481201 | 0.049414  | O | 1.915101  | -1.403374 | 2.61299   |
| C | -1.281143 | -2.819887 | 0.092986  | H | 2.544373  | -2.068982 | 2.932745  |

|   |           |           |          |   |           |           |           |
|---|-----------|-----------|----------|---|-----------|-----------|-----------|
| C | -1.436879 | -1.681091 | 1.077834 | H | -1.742397 | 4.212988  | 1.902182  |
| C | -0.399815 | -1.296579 | 1.941592 | H | -0.192647 | 0.380291  | -2.722098 |
| C | 0.874135  | -2.10811  | 1.957966 | O | -5.790562 | -2.256019 | -1.364974 |
| C | 2.559643  | -3.230927 | 0.488197 | O | -2.537271 | 2.822599  | 3.051754  |
| H | -2.561408 | 2.641087  | 0.410312 | O | -1.035053 | 4.597494  | 1.348344  |
| H | 1.17154   | 4.667071  | 0.011327 | H | 6.998647  | 0.910187  | -1.975798 |

**Table S25.** Atomic coordinates (Å) of **2-8** obtained at the B3LYP/6-31G(d,p) level of theory in the gas phase.

|   |           |           |           |   |           |           |           |
|---|-----------|-----------|-----------|---|-----------|-----------|-----------|
| C | 0.054072  | 1.93142   | -1.683031 | H | 1.856205  | 3.08391   | -1.785732 |
| C | -1.230523 | 1.808578  | -1.088813 | H | -3.86559  | 1.53022   | -0.483688 |
| C | -1.60385  | 2.729372  | -0.084049 | H | -4.095411 | 1.114853  | -2.163433 |
| C | -0.736776 | 3.72593   | 0.336586  | H | -4.152353 | -2.314197 | 0.286609  |
| C | 0.505749  | 3.870234  | -0.305512 | H | -3.640203 | 0.835398  | 1.778074  |
| C | 0.887997  | 2.993393  | -1.307239 | H | 0.309049  | 0.163053  | 3.337754  |
| C | -2.125091 | 0.739053  | -1.537732 | H | -0.864517 | 2.15367   | 3.978946  |
| C | -3.617167 | 0.782361  | -1.235073 | H | 5.372084  | -0.729436 | -2.112151 |
| C | -4.189895 | -0.568403 | -0.870632 | H | 5.088141  | 2.886856  | 0.202355  |
| C | -3.727916 | -1.324728 | 0.140497  | H | 2.795902  | 2.242557  | 0.984385  |
| C | -2.628703 | -0.917111 | 1.03945   | H | 2.606881  | -1.9711   | -2.263633 |
| C | -2.738494 | 0.234022  | 1.811152  | H | 0.564013  | -1.232095 | -1.165923 |
| C | -1.675848 | 0.641473  | 2.629505  | H | 0.30978   | -3.841797 | -0.964962 |
| C | -0.523604 | -0.144697 | 2.715174  | H | 0.146272  | -4.354366 | 0.707462  |
| C | -1.699433 | 1.952698  | 3.281228  | H | -1.53347  | -2.419766 | -0.896644 |
| C | -5.283403 | -1.064063 | -1.746409 | H | -2.03379  | -3.592412 | 0.293909  |
| C | 2.826906  | 0.402358  | -0.14353  | H | 0.689878  | -3.049882 | 2.493416  |
| C | 3.540846  | -0.427765 | -1.001617 | O | -5.698004 | -0.464389 | -2.723997 |
| C | 4.812722  | -0.078654 | -1.445313 | H | -6.484448 | -2.48718  | -2.010825 |
| C | 5.356969  | 1.132126  | -1.001732 | O | -1.704324 | -0.191026 | -2.253075 |
| C | 4.634191  | 1.957327  | -0.125824 | O | 0.513361  | 1.069619  | -2.615607 |
| C | 3.358629  | 1.602625  | 0.315331  | O | 2.923709  | -4.089719 | 1.262291  |
| C | 2.731438  | -1.666382 | -1.224433 | O | 3.3348    | -2.803783 | -0.527639 |
| C | 1.404436  | -1.345757 | -0.483163 | O | 6.599995  | 1.567389  | -1.383557 |
| C | 1.220274  | -2.510145 | 0.506049  | O | 1.583739  | -0.070795 | 0.172034  |
| C | 0.11099   | -3.481162 | 0.049236  | O | 1.914905  | -1.403583 | 2.613533  |
| C | -1.28074  | -2.82005  | 0.092737  | H | 2.54424   | -2.069224 | 2.933099  |

|   |           |           |          |   |           |           |           |
|---|-----------|-----------|----------|---|-----------|-----------|-----------|
| C | -1.436714 | -1.681313 | 1.07761  | H | -1.743506 | 4.212735  | 1.90239   |
| C | -0.399842 | -1.296796 | 1.94159  | H | -0.192354 | 0.380395  | -2.721888 |
| C | 0.874135  | -2.108261 | 1.95814  | O | -5.790558 | -2.256298 | -1.365153 |
| C | 2.560075  | -3.230574 | 0.488408 | O | -2.537886 | 2.822134  | 3.051811  |
| H | -2.562268 | 2.641116  | 0.409896 | O | -1.036274 | 4.597485  | 1.348571  |
| H | 1.170855  | 4.667064  | 0.012421 | H | 6.998352  | 0.910715  | -1.977091 |

**Table S26.** Atomic coordinates (Å) of **2-9** obtained at the B3LYP/6-31G(d,p) level of theory in the gas phase.

|   |           |           |           |   |           |           |           |
|---|-----------|-----------|-----------|---|-----------|-----------|-----------|
| C | 2.232047  | -1.64908  | -1.823236 | H | 1.173686  | -3.495626 | -2.060547 |
| C | 3.356914  | -0.991947 | -1.260318 | H | 5.103103  | 0.65649   | 0.04507   |
| C | 4.275379  | -1.759559 | -0.516498 | H | 5.201836  | 1.668486  | -1.379671 |
| C | 4.07655   | -3.117307 | -0.310728 | H | 2.376656  | 3.202239  | 1.353282  |
| C | 2.963456  | -3.750054 | -0.885099 | H | 3.749789  | 0.130895  | 2.165705  |
| C | 2.052496  | -3.023421 | -1.635679 | H | 0.381389  | -2.441734 | 1.510815  |
| C | 3.46393   | 0.467935  | -1.389581 | H | 2.296112  | -3.327425 | 2.625822  |
| C | 4.510431  | 1.274262  | -0.630288 | H | -7.081469 | 2.049637  | -0.038087 |
| C | 3.882702  | 2.429992  | 0.132019  | H | -8.27413  | -2.070988 | 0.301656  |
| C | 2.784478  | 2.302808  | 0.897327  | H | -5.925423 | -2.823322 | -0.133492 |
| C | 2.089003  | 1.016933  | 1.118859  | H | -4.313328 | 2.200035  | -1.1394   |
| C | 2.74601   | -0.012728 | 1.780807  | H | -3.135231 | 0.215763  | -2.047821 |
| C | 2.135041  | -1.265526 | 1.927419  | H | -0.756909 | 0.950177  | -1.874084 |
| C | 0.851034  | -1.465609 | 1.420225  | H | -1.660246 | 2.350523  | -1.31855  |
| C | 2.879026  | -2.394352 | 2.499607  | H | 0.840196  | 2.41227   | -0.812641 |
| C | 4.475615  | 3.79303   | 0.029293  | H | -0.197042 | 2.69854   | 0.573139  |
| C | -5.213722 | -0.791199 | -0.326213 | H | -1.7609   | -1.353461 | 0.87488   |
| C | -5.533016 | 0.563999  | -0.30259  | O | 4.048164  | 4.785731  | 0.591633  |
| C | -6.833803 | 0.991771  | -0.061155 | H | 5.881358  | 4.753771  | -0.775035 |
| C | -7.818024 | 0.018942  | 0.153688  | O | 2.680264  | 1.09831   | -2.122913 |
| C | -7.486068 | -1.344416 | 0.132107  | O | 1.277753  | -0.976406 | -2.518072 |
| C | -6.178006 | -1.768965 | -0.111109 | O | -1.977043 | 1.36297   | 2.126345  |
| C | -4.259345 | 1.323684  | -0.493625 | O | -3.742571 | 1.764247  | 0.805759  |
| C | -3.278335 | 0.225817  | -0.965678 | O | -9.129844 | 0.335879  | 0.391356  |
| C | -1.997385 | 0.505176  | -0.184569 | O | -3.885681 | -1.034195 | -0.579731 |
| C | -1.093636 | 1.479314  | -0.97561  | O | -1.046148 | -1.59329  | -0.989155 |
| C | 0.111083  | 1.933286  | -0.151241 | H | -0.313006 | -1.254204 | -1.540893 |



|   |           |           |           |   |           |           |           |
|---|-----------|-----------|-----------|---|-----------|-----------|-----------|
| C | 0.786829  | 0.810468  | 0.597583  | H | 5.116104  | -3.376274 | 1.277278  |
| C | 0.170407  | -0.437423 | 0.761349  | H | 1.608254  | -0.035451 | -2.591442 |
| C | -1.186941 | -0.75991  | 0.159466  | O | 5.566914  | 3.829711  | -0.766544 |
| C | -2.525234 | 1.224232  | 1.056815  | O | 4.070075  | -2.362159 | 2.792445  |
| H | 5.141862  | -1.292243 | -0.065002 | O | 4.929274  | -3.872027 | 0.45775   |
| H | 2.815451  | -4.810537 | -0.709897 | H | -9.230863 | 1.301334  | 0.387859  |

**Table S27.** Atomic coordinates (Å) of **2-10** obtained at the B3LYP/6-31G(d,p) level of theory in the gas phase.

|   |           |           |           |   |           |           |           |
|---|-----------|-----------|-----------|---|-----------|-----------|-----------|
| C | 1.32115   | 2.503491  | -1.001607 | H | 3.427459  | 2.880385  | -1.120567 |
| C | 0.181841  | 2.451923  | -0.157456 | H | -2.107604 | 1.33193   | 1.014077  |
| C | 0.338523  | 2.736775  | 1.220111  | H | -2.519263 | 2.992963  | 0.621912  |
| C | 1.578605  | 3.063633  | 1.739346  | H | -4.848582 | -0.032043 | -1.116429 |
| C | 2.695456  | 3.131737  | 0.885339  | H | -4.330087 | -0.33844  | 2.10467   |
| C | 2.567254  | 2.854424  | -0.461622 | H | -1.214157 | -3.275137 | 2.425489  |
| C | -1.118504 | 2.090845  | -0.721419 | H | -2.477169 | -2.7495   | 4.369268  |
| C | -2.341528 | 2.004992  | 0.184407  | H | 5.007723  | -0.098386 | -1.507901 |
| C | -3.561132 | 1.51314   | -0.552422 | H | 4.817075  | 0.595938  | 2.735477  |
| C | -3.983019 | 0.239047  | -0.514759 | H | 2.408463  | -0.090476 | 2.772719  |
| C | -3.295284 | -0.812705 | 0.274463  | H | 2.195967  | -0.340471 | -2.528841 |
| C | -3.568459 | -0.949199 | 1.631122  | H | 0.183559  | -0.203401 | -1.215311 |
| C | -2.843292 | -1.863016 | 2.408071  | H | -0.468409 | -1.790636 | -3.262213 |
| C | -1.817892 | -2.605576 | 1.821012  | H | -1.151795 | -3.288208 | -2.646913 |
| C | -3.12296  | -2.014055 | 3.84671   | H | -1.938605 | -0.41595  | -2.065517 |
| C | -4.304948 | 2.457828  | -1.430102 | H | -2.958668 | -1.794379 | -2.362118 |
| C | 2.399293  | -0.48298  | 0.648397  | H | -0.652084 | -4.17778  | -0.544945 |
| C | 3.112162  | -0.488562 | -0.544614 | O | -5.262568 | 2.171036  | -2.125645 |
| C | 4.447953  | -0.102415 | -0.576537 | H | -4.330986 | 4.260504  | -1.979711 |
| C | 5.049663  | 0.288845  | 0.625532  | O | -1.240583 | 1.817687  | -1.931213 |
| C | 4.319597  | 0.280793  | 1.824267  | O | 1.269278  | 2.205212  | -2.318901 |
| C | 2.979035  | -0.104641 | 1.851058  | O | 1.485534  | -4.313975 | -2.206649 |
| C | 2.199432  | -0.96105  | -1.632545 | O | 2.509552  | -2.32493  | -2.049925 |
| C | 0.827378  | -1.029164 | -0.924118 | O | 6.354598  | 0.696105  | 0.69928   |
| C | 0.255045  | -2.403174 | -1.29427  | O | 1.085229  | -0.880463 | 0.502817  |
| C | -0.854293 | -2.275123 | -2.359434 | O | 0.628924  | -3.548086 | 0.85859   |
| C | -2.05578  | -1.476865 | -1.824887 | H | 0.930385  | -2.694448 | 1.220846  |

|   |           |           |           |   |           |           |           |
|---|-----------|-----------|-----------|---|-----------|-----------|-----------|
| C | -2.300939 | -1.61306  | -0.337229 | H | 0.962459  | 3.249132  | 3.550741  |
| C | -1.533915 | -2.477558 | 0.460884  | H | 0.315484  | 2.018445  | -2.522714 |
| C | -0.338809 | -3.216775 | -0.122813 | O | -3.79731  | 3.709206  | -1.376412 |
| C | 1.448625  | -3.149663 | -1.884419 | O | -3.984886 | -1.399304 | 4.455762  |
| H | -0.52095  | 2.693037  | 1.880495  | O | 1.798761  | 3.327206  | 3.063706  |
| H | 3.66182   | 3.384381  | 1.307726  | H | 6.754175  | 0.653649  | -0.184293 |

**Table S28.** Atomic coordinates (Å) of **2-11** obtained at the B3LYP/6-31G(d,p) level of theory in the gas phase.

|   |           |           |           |   |           |           |           |
|---|-----------|-----------|-----------|---|-----------|-----------|-----------|
| C | 0.096167  | 1.978081  | -1.490653 | H | 1.84668   | 3.204973  | -1.377979 |
| C | -1.241729 | 1.794006  | -1.049331 | H | -3.913513 | 1.381406  | -0.741404 |
| C | -1.76703  | 2.686321  | -0.08705  | H | -3.942066 | 0.970961  | -2.438468 |
| C | -0.995737 | 3.70975   | 0.441608  | H | -4.066002 | -2.478253 | -0.016562 |
| C | 0.307685  | 3.910245  | -0.047245 | H | -3.917111 | 0.670196  | 1.53518   |
| C | 0.837705  | 3.065672  | -1.008274 | H | -0.106203 | 0.263675  | 3.476166  |
| C | -2.031365 | 0.693385  | -1.607794 | H | -1.481014 | 2.145845  | 4.021776  |
| C | -3.546948 | 0.656027  | -1.465988 | H | 5.356184  | -0.860547 | -2.235567 |
| C | -4.078771 | -0.728188 | -1.169551 | H | 5.32062   | 2.945906  | -0.227409 |
| C | -3.685713 | -1.465336 | -0.116177 | H | 3.137354  | 2.383522  | 0.867906  |
| C | -2.713946 | -0.997796 | 0.894288  | H | 2.666764  | -2.147769 | -1.948516 |
| C | -2.982738 | 0.133372  | 1.656512  | H | 0.718243  | -1.078708 | -0.918882 |
| C | -2.0388   | 0.604527  | 2.578359  | H | 0.572653  | -3.827576 | -0.710211 |
| C | -0.844749 | -0.095677 | 2.767219  | H | 0.223264  | -4.239229 | 0.960738  |
| C | -2.220789 | 1.900916  | 3.236271  | H | -1.27353  | -2.394045 | -0.928636 |
| C | -5.04201  | -1.276213 | -2.159801 | H | -1.900709 | -3.593291 | 0.171445  |
| C | 3.050348  | 0.455009  | -0.100241 | H | 0.669424  | -2.823232 | 2.770014  |
| C | 3.661973  | -0.453737 | -0.954876 | O | -5.38592  | -0.689097 | -3.171692 |
| C | 4.87294   | -0.151544 | -1.568899 | H | -6.121537 | -2.764234 | -2.55818  |
| C | 5.456926  | 1.092164  | -1.297984 | O | -1.490236 | -0.203339 | -2.284031 |
| C | 4.836537  | 1.993992  | -0.419185 | O | 0.694383  | 1.152179  | -2.37596  |
| C | 3.621143  | 1.685723  | 0.194601  | O | 2.945609  | -3.934896 | 1.697295  |
| C | 2.836079  | -1.701012 | -0.968561 | O | 3.448834  | -2.728455 | -0.12605  |
| C | 1.544938  | -1.270425 | -0.237177 | O | 6.642003  | 1.487817  | -1.857324 |
| C | 1.281001  | -2.389175 | 0.775728  | O | 1.853438  | 0.000681  | 0.412479  |
| C | 0.246137  | -3.409635 | 0.247517  | O | 1.741818  | -1.137083 | 2.855873  |
| C | -1.152533 | -2.795495 | 0.085466  | H | 1.926485  | -0.376081 | 2.273644  |

|   |           |           |          |   |           |           |           |
|---|-----------|-----------|----------|---|-----------|-----------|-----------|
| C | -1.479835 | -1.67645  | 1.046533 | H | -2.207938 | 4.147721  | 1.871324  |
| C | -0.555859 | -1.225563 | 2.002786 | H | 0.032016  | 0.441324  | -2.578147 |
| C | 0.789889  | -1.920166 | 2.161649 | O | -5.513949 | -2.500749 | -1.841831 |
| C | 2.625854  | -3.102353 | 0.882073 | O | -3.08553  | 2.716032  | 2.922949  |
| H | -2.773738 | 2.556157  | 0.287399 | O | -1.445095 | 4.556385  | 1.4181    |
| H | 0.897219  | 4.729358  | 0.352598 | H | 6.972971  | 0.783566  | -2.437636 |

**Table S29.** Atomic coordinates (Å) of **2-12** obtained at the B3LYP/6-31G(d,p) level of theory in the gas phase.

|   |           |           |           |   |           |           |           |
|---|-----------|-----------|-----------|---|-----------|-----------|-----------|
| C | 1.297717  | 2.559208  | -0.978271 | H | 3.401509  | 2.933538  | -1.129095 |
| C | 0.181139  | 2.457319  | -0.105993 | H | -2.07553  | 1.275459  | 1.060928  |
| C | 0.378333  | 2.639736  | 1.28031   | H | -2.503155 | 2.95362   | 0.774844  |
| C | 1.635962  | 2.917835  | 1.788296  | H | -4.877286 | 0.021416  | -1.053737 |
| C | 2.726855  | 3.04626   | 0.910411  | H | -4.328645 | -0.447496 | 2.124792  |
| C | 2.55847   | 2.865544  | -0.451108 | H | -1.200743 | -3.384213 | 2.285274  |
| C | -1.137527 | 2.136937  | -0.655356 | H | -2.457813 | -2.962831 | 4.25727   |
| C | -2.334138 | 1.992746  | 0.277266  | H | 5.012469  | -0.029511 | -1.470548 |
| C | -3.570678 | 1.536534  | -0.45404  | H | 4.804019  | 0.455098  | 2.800868  |
| C | -3.996545 | 0.26328   | -0.461747 | H | 2.390288  | -0.21565  | 2.791747  |
| C | -3.298709 | -0.823679 | 0.269293  | H | 2.199642  | -0.195007 | -2.513572 |
| C | -3.566433 | -1.030295 | 1.618133  | H | 0.180347  | -0.127481 | -1.208078 |
| C | -2.83482  | -1.979214 | 2.34519   | H | -0.482618 | -1.613242 | -3.323609 |
| C | -1.808972 | -2.687089 | 1.717561  | H | -1.158085 | -3.141753 | -2.780428 |
| C | -3.108561 | -2.204403 | 3.775263  | H | -1.953277 | -0.305281 | -2.055694 |
| C | -4.331197 | 2.520829  | -1.271883 | H | -2.968696 | -1.671275 | -2.414363 |
| C | 2.390523  | -0.504372 | 0.650848  | H | -0.647777 | -4.133586 | -0.729225 |
| C | 3.109274  | -0.455187 | -0.537501 | O | -5.29927  | 2.265316  | -1.965179 |
| C | 4.447643  | -0.076982 | -0.543519 | H | -4.37233  | 4.348645  | -1.729651 |
| C | 5.045303  | 0.251531  | 0.679101  | O | -1.294236 | 1.943157  | -1.87567  |
| C | 4.30927   | 0.188724  | 1.872674  | O | 1.207577  | 2.345712  | -2.310616 |
| C | 2.966259  | -0.18956  | 1.873737  | O | 1.480189  | -4.18032  | -2.40539  |
| C | 2.198404  | -0.864199 | -1.652723 | O | 2.505661  | -2.203289 | -2.143958 |
| C | 0.823114  | -0.966084 | -0.953402 | O | 6.351651  | 0.648571  | 0.778474  |
| C | 0.251513  | -2.320764 | -1.391288 | O | 1.074666  | -0.88514  | 0.479694  |
| C | -0.862683 | -2.143187 | -2.444204 | O | 0.636982  | -3.572008 | 0.699228  |
| C | -2.064731 | -1.376967 | -1.865826 | H | 0.932874  | -2.737539 | 1.107407  |

|   |           |           |           |   |           |           |           |
|---|-----------|-----------|-----------|---|-----------|-----------|-----------|
| C | -2.303414 | -1.587753 | -0.385747 | H | 2.701302  | 3.197031  | 3.361714  |
| C | -1.530652 | -2.489145 | 0.364707  | H | 0.248351  | 2.173807  | -2.499088 |
| C | -0.335756 | -3.194187 | -0.260144 | O | -3.826778 | 3.76989   | -1.163873 |
| C | 1.444212  | -3.034847 | -2.021582 | O | -3.970833 | -1.625352 | 4.417817  |
| H | -0.450204 | 2.552627  | 1.972663  | O | 1.766997  | 3.049732  | 3.144219  |
| H | 3.715279  | 3.262071  | 1.305693  | H | 6.754183  | 0.649984  | -0.104811 |

**Table S30.** Atomic coordinates (Å) of **2-13** obtained at the B3LYP/6-31G(d,p) level of theory in the gas phase.

|   |           |           |           |   |           |           |           |
|---|-----------|-----------|-----------|---|-----------|-----------|-----------|
| C | 1.047714  | 2.622331  | -1.257237 | H | 3.116943  | 3.062154  | -1.594136 |
| C | 0.010235  | 2.51407   | -0.293862 | H | -2.016    | 1.213424  | 1.124674  |
| C | 0.305235  | 2.786509  | 1.05853   | H | -2.629226 | 2.829874  | 0.78989   |
| C | 1.583999  | 3.147247  | 1.449719  | H | -4.86971  | -0.400389 | -0.680805 |
| C | 2.599158  | 3.262486  | 0.485046  | H | -3.921396 | -0.615896 | 2.449216  |
| C | 2.332624  | 2.999426  | -0.847894 | H | -0.538094 | -3.259979 | 2.370656  |
| C | -1.318778 | 2.059176  | -0.709669 | H | -1.580915 | -2.818574 | 4.460322  |
| C | -2.409717 | 1.857767  | 0.334961  | H | 5.035447  | -0.035614 | -1.225595 |
| C | -3.661154 | 1.263171  | -0.256634 | H | 4.334192  | 0.652634  | 2.963766  |
| C | -3.967257 | -0.043514 | -0.19073  | H | 1.905428  | 0.106107  | 2.678     |
| C | -3.097798 | -1.029636 | 0.500804  | H | 2.290908  | 0.006727  | -2.563079 |
| C | -3.178951 | -1.168006 | 1.882381  | H | 0.107491  | -0.097797 | -1.604865 |
| C | -2.281428 | -2.003395 | 2.561436  | H | -0.657423 | -1.755122 | -3.363976 |
| C | -1.278066 | -2.662298 | 1.849208  | H | -1.10184  | -3.319561 | -2.694902 |
| C | -2.355511 | -2.154279 | 4.024362  | H | -2.114742 | -0.547358 | -1.992079 |
| C | -4.526987 | 2.2225    | -0.987628 | H | -3.012243 | -2.029879 | -2.160298 |
| C | 2.145574  | -0.2746   | 0.566812  | H | -0.341552 | -4.120776 | -0.702521 |
| C | 3.010434  | -0.32013  | -0.522383 | O | -4.301118 | 3.418576  | -1.053122 |
| C | 4.358613  | -0.010452 | -0.375696 | H | -6.092533 | 2.373681  | -2.019078 |
| C | 4.820448  | 0.344054  | 0.897016  | O | -1.562228 | 1.79562   | -1.902229 |
| C | 3.941804  | 0.37291   | 1.991369  | O | 0.861878  | 2.342036  | -2.568369 |
| C | 2.590513  | 0.062363  | 1.839185  | O | 1.67862   | -4.040399 | -2.522009 |
| C | 2.214472  | -0.69746  | -1.733822 | O | 2.578838  | -2.005235 | -2.266881 |
| C | 0.778098  | -0.831404 | -1.164759 | O | 6.128539  | 0.675648  | 1.141736  |
| C | 0.342256  | -2.270956 | -1.49617  | O | 0.843001  | -0.54822  | 0.248287  |
| C | -0.880803 | -2.281109 | -2.430096 | O | 1.065744  | -3.364208 | 0.598409  |
| C | -2.08725  | -1.612563 | -1.741999 | H | 1.545738  | -4.142873 | 0.276386  |



|   |           |           |           |   |           |           |           |
|---|-----------|-----------|-----------|---|-----------|-----------|-----------|
| C | -2.127471 | -1.751453 | -0.232834 | H | 2.756194  | 3.527346  | 2.922674  |
| C | -1.188471 | -2.528731 | 0.464902  | H | -0.09822  | 2.111011  | -2.667119 |
| C | -0.031838 | -3.155037 | -0.28155  | O | -5.599762 | 1.655082  | -1.580138 |
| C | 1.567652  | -2.891078 | -2.155122 | O | -3.183563 | -1.611543 | 4.740134  |
| H | -0.45993  | 2.696136  | 1.81991   | O | 1.810031  | 3.363259  | 2.782241  |
| H | 3.606473  | 3.532495  | 0.789446  | H | 6.631064  | 0.619844  | 0.313156  |

**Table S31.** Atomic coordinates (Å) of **2-14** obtained at the B3LYP/6-31G(d,p) level of theory in the gas phase.

|   |           |           |           |   |           |           |           |
|---|-----------|-----------|-----------|---|-----------|-----------|-----------|
| C | 0.019594  | 1.930515  | -1.668455 | H | 1.809144  | 3.102189  | -1.772888 |
| C | -1.262086 | 1.792337  | -1.071001 | H | -3.89013  | 1.474607  | -0.449578 |
| C | -1.642457 | 2.706837  | -0.062989 | H | -4.113112 | 1.095511  | -2.133874 |
| C | -0.784861 | 3.711436  | 0.357837  | H | -4.127691 | -2.36291  | 0.290678  |
| C | 0.454513  | 3.870344  | -0.286975 | H | -3.641053 | 0.785648  | 1.800609  |
| C | 0.843287  | 3.000238  | -1.291963 | H | 0.3217    | 0.154231  | 3.342656  |
| C | -2.145608 | 0.713938  | -1.520205 | H | -0.874353 | 2.127772  | 3.997248  |
| C | -3.639607 | 0.740242  | -1.213721 | H | 5.379089  | -0.681394 | -2.131452 |
| C | -4.192011 | -0.622768 | -0.853296 | H | 5.063314  | 2.93522   | 0.178547  |
| C | -3.707879 | -1.368686 | 0.15477   | H | 2.781883  | 2.266103  | 0.970982  |
| C | -2.611478 | -0.951441 | 1.050155  | H | 2.627561  | -1.953131 | -2.271571 |
| C | -2.732016 | 0.19512   | 1.827256  | H | 0.580959  | -1.2324   | -1.169402 |
| C | -1.671447 | 0.611726  | 2.643583  | H | 0.351023  | -3.845027 | -0.967589 |
| C | -0.509411 | -0.160749 | 2.721626  | H | 0.194935  | -4.357731 | 0.705543  |
| C | -1.709071 | 1.919558  | 3.301428  | H | -1.501338 | -2.433541 | -0.89557  |
| C | -5.292011 | -1.222974 | -1.658327 | H | -1.992802 | -3.614034 | 0.290579  |
| C | 2.829007  | 0.424745  | -0.154574 | H | 0.734949  | -3.049966 | 2.489627  |
| C | 3.548947  | -0.398632 | -1.014238 | O | -5.804862 | -2.307685 | -1.4444   |
| C | 4.815045  | -0.035825 | -1.463484 | H | -6.397178 | -0.90671  | -3.149661 |
| C | 5.347264  | 1.181812  | -1.024024 | O | -1.717549 | -0.208707 | -2.240172 |
| C | 4.618687  | 2.000061  | -0.146404 | O | 0.485522  | 1.07678   | -2.604989 |
| C | 3.349001  | 1.631609  | 0.300461  | O | 2.97278   | -4.068843 | 1.251946  |
| C | 2.752042  | -1.646055 | -1.233037 | O | 3.368776  | -2.776575 | -0.536831 |
| C | 1.423918  | -1.338327 | -0.488487 | O | 6.58359   | 1.630806  | -1.411652 |
| C | 1.253095  | -2.504517 | 0.500815  | O | 1.592551  | -0.061924 | 0.166665  |
| C | 0.151256  | -3.485323 | 0.04675   | O | 1.943296  | -1.391091 | 2.60616   |
| C | -1.245435 | -2.835451 | 0.092399  | H | 2.579725  | -2.050271 | 2.925063  |

|   |           |           |          |   |           |           |           |
|---|-----------|-----------|----------|---|-----------|-----------|-----------|
| C | -1.410332 | -1.701729 | 1.081402 | H | -1.79024  | 4.182474  | 1.929267  |
| C | -0.374913 | -1.308324 | 1.943047 | H | -0.212568 | 0.380011  | -2.711369 |
| C | 0.907631  | -2.106327 | 1.954068 | O | -5.683666 | -0.432449 | -2.682035 |
| C | 2.599659  | -3.212256 | 0.479769 | O | -2.559239 | 2.779389  | 3.078909  |
| H | -2.598578 | 2.607453  | 0.433315 | O | -1.090908 | 4.577437  | 1.372588  |
| H | 1.112005  | 4.673305  | 0.031365 | H | 6.986473  | 0.978695  | -2.007154 |

Figure S22. Parameters of calculated  $^{13}\text{C}$  NMR method for 2

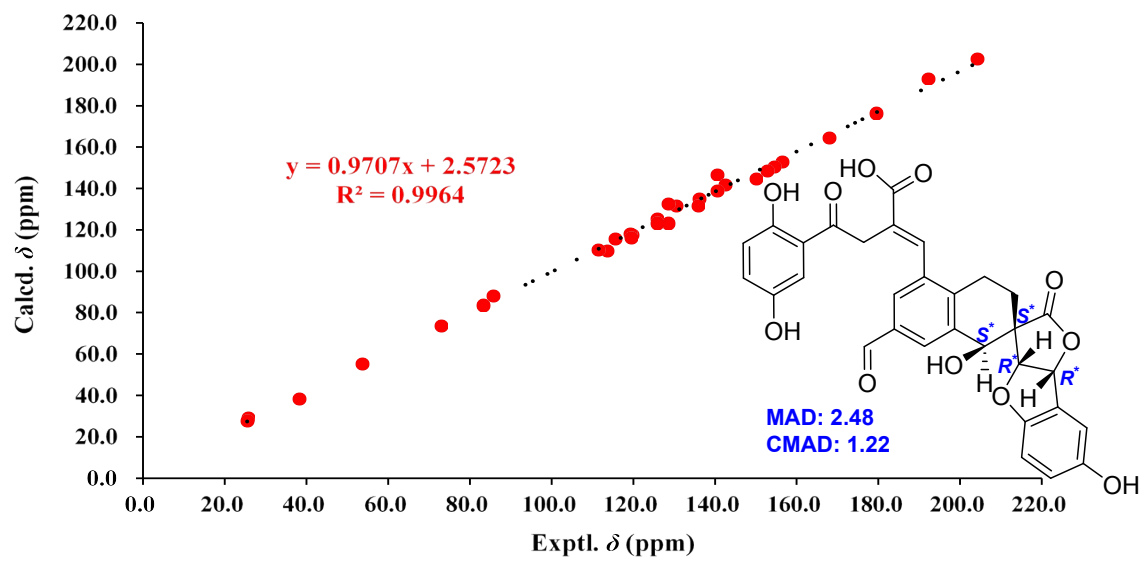

**Figure S23. Calculated and experimental ECD curves of 2.**

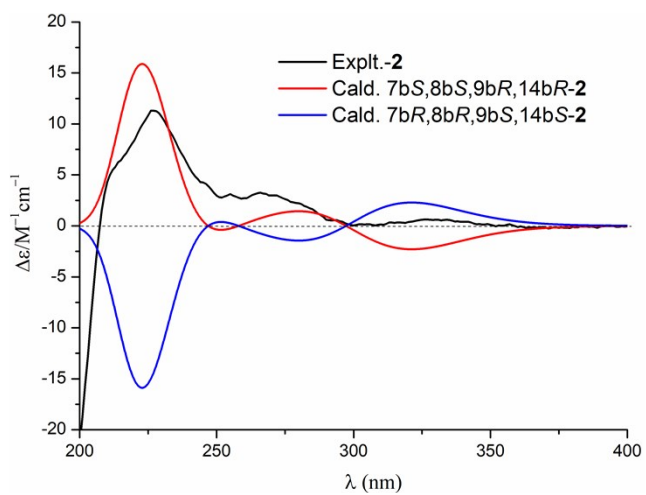

Supplement: d1qo00294e1.pdf [file d1qo00294e1.pdf]
